# Supplementary material for: Competing-risks nomogram for predicting cancer-specific death in upper tract urothelial carcinoma: a population-based analysis
Source: PubMed Central journal article supplement — BMJ Open. 2021 Jul 19;11(7):e048243. doi: 10.1136/bmjopen-2020-048243 (PMC8291317; doi:10.1136/bmjopen-2020-048243), 2021-07-19
Supplement: bmjopen-2020-048243.draft_revisions.pdf [file bmjopen-2020-048243.draft_revisions.pdf]

# BMJ Open

BMJ Open is committed to open peer review. As part of this commitment we make the peer review history of every article we publish publicly available.

When an article is published we post the peer reviewers' comments and the authors' responses online. We also post the versions of the paper that were used during peer review. These are the versions that the peer review comments apply to.

The versions of the paper that follow are the versions that were submitted during the peer review process. They are not the versions of record or the final published versions. They should not be cited or distributed as the published version of this manuscript.

BMJ Open is an open access journal and the full, final, typeset and author-corrected version of record of the manuscript is available on our site with no access controls, subscription charges or pay-per-view fees (<http://bmjopen.bmj.com>).

If you have any questions on BMJ Open's open peer review process please email [info.bmjopen@bmj.com](mailto:info.bmjopen@bmj.com)

# BMJ Open

## A competing-risks nomogram for predicting cancer-specific death in upper-tract urothelial carcinoma: a population-based analysis

|                               |                                                                                                                                                                                                                                                                                                                                                                                                                                                                                                                                                                                                                                                                                                                                                                                                                                                                                                                                                                                                                                                                                                                                                                                                                                    |
|-------------------------------|------------------------------------------------------------------------------------------------------------------------------------------------------------------------------------------------------------------------------------------------------------------------------------------------------------------------------------------------------------------------------------------------------------------------------------------------------------------------------------------------------------------------------------------------------------------------------------------------------------------------------------------------------------------------------------------------------------------------------------------------------------------------------------------------------------------------------------------------------------------------------------------------------------------------------------------------------------------------------------------------------------------------------------------------------------------------------------------------------------------------------------------------------------------------------------------------------------------------------------|
| Journal:                      | <i>BMJ Open</i>                                                                                                                                                                                                                                                                                                                                                                                                                                                                                                                                                                                                                                                                                                                                                                                                                                                                                                                                                                                                                                                                                                                                                                                                                    |
| Manuscript ID                 | bmjopen-2020-048243                                                                                                                                                                                                                                                                                                                                                                                                                                                                                                                                                                                                                                                                                                                                                                                                                                                                                                                                                                                                                                                                                                                                                                                                                |
| Article Type:                 | Original research                                                                                                                                                                                                                                                                                                                                                                                                                                                                                                                                                                                                                                                                                                                                                                                                                                                                                                                                                                                                                                                                                                                                                                                                                  |
| Date Submitted by the Author: | 22-Dec-2020                                                                                                                                                                                                                                                                                                                                                                                                                                                                                                                                                                                                                                                                                                                                                                                                                                                                                                                                                                                                                                                                                                                                                                                                                        |
| Complete List of Authors:     | <p>Li, Chengzhuo; Jinan University First Affiliated Hospital, Department of Clinical Research; Xian Jiaotong University, Department of Clinical Research</p> <p>Li, Xiang; Xian Jiaotong University</p> <p>Huang, Qiao; Wuhan University Zhongnan Hospital Department of Chemotherapy and Radiation Therapy</p> <p>Zhao, Fanfan; Jinan University First Affiliated Hospital, Department of Clinical Research; Xi'an Jiaotong University, Department of Clinical Research</p> <p>Feng, Xiaojie; Jinan University First Affiliated Hospital, Department of Clinical Research; Xi'an Jiaotong University, Department of Clinical Research</p> <p>Han, Didi; Jinan University First Affiliated Hospital, Department of Clinical Research; Xi'an Jiaotong University, Department of Clinical Research</p> <p>Xu, Fengshuo; Jinan University First Affiliated Hospital, Department of Clinical Research; Xi'an Jiaotong University, Department of Clinical Research</p> <p>Zheng, Shuai; Jinan University First Affiliated Hospital; Shaanxi University of Chinese Medicine</p> <p>Lyu, Jun; Jinan University First Affiliated Hospital, Department of Clinical Research; Xi'an Jiaotong University, Department of Clinical Research</p> |
| Keywords:                     | EPIDEMIOLOGY, UROLOGY, Urological tumours < UROLOGY                                                                                                                                                                                                                                                                                                                                                                                                                                                                                                                                                                                                                                                                                                                                                                                                                                                                                                                                                                                                                                                                                                                                                                                |
|                               |                                                                                                                                                                                                                                                                                                                                                                                                                                                                                                                                                                                                                                                                                                                                                                                                                                                                                                                                                                                                                                                                                                                                                                                                                                    |

SCHOLARONE™  
Manuscripts

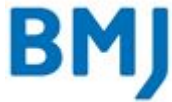

I, the Submitting Author has the right to grant and does grant on behalf of all authors of the Work (as defined in the below author licence), an exclusive licence and/or a non-exclusive licence for contributions from authors who are: i) UK Crown employees; ii) where BMJ has agreed a CC-BY licence shall apply, and/or iii) in accordance with the terms applicable for US Federal Government officers or employees acting as part of their official duties; on a worldwide, perpetual, irrevocable, royalty-free basis to BMJ Publishing Group Ltd ("BMJ") its licensees and where the relevant Journal is co-owned by BMJ to the co-owners of the Journal, to publish the Work in this journal and any other BMJ products and to exploit all rights, as set out in our [licence](#).

The Submitting Author accepts and understands that any supply made under these terms is made by BMJ to the Submitting Author unless you are acting as an employee on behalf of your employer or a postgraduate student of an affiliated institution which is paying any applicable article publishing charge ("APC") for Open Access articles. Where the Submitting Author wishes to make the Work available on an Open Access basis (and intends to pay the relevant APC), the terms of reuse of such Open Access shall be governed by a Creative Commons licence – details of these licences and which [Creative Commons](#) licence will apply to this Work are set out in our licence referred to above.

Other than as permitted in any relevant BMJ Author's Self Archiving Policies, I confirm this Work has not been accepted for publication elsewhere, is not being considered for publication elsewhere and does not duplicate material already published. I confirm all authors consent to publication of this Work and authorise the granting of this licence.

1  
2  
3  
4 **A competing-risks nomogram for predicting cancer-specific death in**  
5  
6 **upper-tract urothelial carcinoma: a population-based analysis**  
7  
8  
9

10  
11 Running Head: Nomogram for UTUC cancer-specific death  
12

13  
14 Chengzhuo Li<sup>1,2</sup>, Xiang Li<sup>3</sup>, Qiao Huang<sup>4</sup>, Fanfan Zhao<sup>1,2</sup>, Xiaojie Feng<sup>1,2</sup>, Didi Han<sup>1,2</sup>, Fengshuo  
15  
16 Xu<sup>1,2</sup>, Shuai Zheng<sup>1,5</sup>, and Jun Lyu<sup>1,2\*</sup>  
17

18  
19 \*Correspondence: [lyujun2020@jnu.edu.cn](mailto:lyujun2020@jnu.edu.cn)  
20  
21

22  
23 <sup>1</sup>Department of Clinical Research, The First Affiliated Hospital of Jinan University, Guangdong  
24  
25 Province, 510630, China  
26

27  
28 <sup>2</sup>School of Public Health, Xi'an Jiaotong University Health Science Center, Shaanxi Province,  
29  
30 710061, China  
31

32  
33 <sup>3</sup>School of Mechanical Engineering, Xian Jiaotong University, Shaanxi Province, 710049, China  
34

35  
36 <sup>4</sup>Center for Evidence-Based and Translational Medicine, Zhongnan Hospital of Wuhan University,  
37  
38 Hubei Province, 430071, China  
39

40  
41 <sup>5</sup>School of Public Health, Shaanxi University of Chinese Medicine, Xi'an 712046, Shaanxi  
42  
43 Province, China  
44

45  
46  
47  
48  
49 Correspondence to: Jun Lyu.

50  
51 Department of Clinical Research, The First Affiliated Hospital of Jinan University, 613 west  
52  
53 huangpu avenue, tianhe district, Guangzhou, Guangdong Province, 510630, China.  
54

55  
56 Telephone: +8613922274169; Email: [lyujun2020@jnu.edu.cn](mailto:lyujun2020@jnu.edu.cn).  
57  
58  
59  
60

## Abstract

**Objectives:** The purpose of this study is to use a competing-risks model to established a nomogram to more accurately analyze the prognostic factors for UTUC cancer-specific death (CSD).

**Setting:** The program has yielded a database of all cancer patients in 18 defined geographic regions of the United States.

**Participants:** We selected UTUC patients from the latest edition of the SEER database that covers from 1975 to 2016. After excluding patients with unknown histological grade, tumor size, and lymph node status, we finally selected 2576 patients.

**Primary and secondary outcome measures:** We used the Fine-Gray subdistribution proportional-hazards model for a multivariate analysis and compared the results with those obtained using Cox proportional-hazards models. We finally constructed a nomogram for the 3, 5, and 8 years CSD rates and tested these rates in a validation cohort.

**Results:** The subdistribution proportional-hazards model showed that sex, race, tumor size, distant metastasis, number of lymph nodes examined (LNE), and number of lymph nodes positive (LNP) were independent prognostic factors for CSD. The 3, 5, and 8 years C-indexes were 0.723, 0.707, and 0.696 in the training cohort, respectively, and 0.708, 0.702, and 0.701 in the validation cohort.

**Conclusions:** The competing-risks model showed that sex, race, tumor size, distant metastasis, LNE, and LNP were associated with CSD. The nomogram predicts the

1  
2  
3  
4 probability of CSD in UTUC patients at 3, 5, and 8 years, which can improve the  
5  
6 ability of clinicians to predict the survival probabilities in individual patients.  
7  
8  
9

### 10 11 **Strengths and limitations of this study:**

- 12  
13  
14 •The study established the first competing risk nomogram for predicting the 3-, 5-,  
15  
16 and 8-year specific mortality probability for UTUC based on a large retrospective  
17  
18 sample, which can improve the ability of clinicians to predict the survival  
19  
20 probabilities in individual patients.  
21  
22
- 23  
24 •The established model is not comprehensive enough, because the SEER database  
25  
26 does not include all prognostic factors for UTUC.  
27  
28
- 29  
30 •The data available on the treatment status are not sufficiently detailed to distinguish  
31  
32 the impact of various treatment plans.  
33  
34
- 35  
36 •The model requires prospective studies to confirm its reliability.  
37  
38  
39

40  
41 **Keywords:** competing risk model, upper-tract urothelial carcinoma, nomogram,  
42  
43 SEER, cancer-specific death  
44  
45  
46  
47

### 48 **Introduction**

49  
50 Urothelial carcinomas are the fourth most common type of tumor,[1] and they can  
51  
52 be located in the upper urinary tract or the lower. Upper-tract urothelial carcinoma  
53  
54 (UTUC), which includes renal pelvis and ureter carcinoma, currently accounts for 5%  
55  
56 of urothelial malignancies. [2] The annual incidence of UTUC is typically estimated  
57  
58  
59  
60

1  
2  
3  
4 at 1 or 2 per 100,000 inhabitants in Western countries.[3] However, the increasing  
5  
6 morbidity and mortality associated with UTUC[4, 5] are increasing the importance of  
7  
8  
9 this research.

10  
11 A study showed that UTUC has unique prognostic factors, which are different  
12  
13 from bladder cancer and other urinary tract cancers.[6] Most studies analyzing the  
14  
15 prognostic factors for UTUC have adopted the Kaplan-Meier (K-M) method or Cox  
16  
17 regression methods.[7–9] These methods analyze the overall cancer mortality rate  
18  
19 when determining survival parameters while ignoring the possibility of bias caused by  
20  
21 competing events. Competing events for cancer deaths refer to death from other  
22  
23 causes not related to the primary cancer, such as other diseases, car collisions, and  
24  
25 suicide. These factors are collectively classified as death events in traditional survival  
26  
27 analysis, and they undoubtedly increase the calculated cancer mortality rate and hence  
28  
29 can result in biased results. Applying standard survival analysis to competing-risks  
30  
31 data leads to false and biased results.[10] Instead, the cumulative incidence function  
32  
33 (CIF) of UTUC cancer-specific death (CSD) needs to be calculated and prognostic  
34  
35 factors for UTUC analyzed using the Fine-Gray subdistribution proportional-hazards  
36  
37 model.[11]

38  
39  
40 The purpose of our research is to identify the prognostic factors of UTUC and  
41  
42 used them to construct a nomogram to predict the survival rates of patients at the 3, 5,  
43  
44 and 8 years. A nomogram is based on a prognostic model and graphically presents the  
45  
46 predictive abilities of different prognostic factors as the lengths of line segments. This  
47  
48 format makes it easy for clinicians to make rapid and comprehensive judgments and  
49  
50  
51  
52  
53  
54  
55  
56  
57  
58  
59  
60

1  
2  
3  
4 to predict the probability of CSD, which has great clinical significance. Some studies  
5  
6 have constructed competing-risks nomograms for cancers such as sarcoma and  
7  
8 prostate cancer,[12, 13] but research related to UTUC has been lacking.  
9  
10

11 The current study was conducted to assess the effect of several factors in UTUC  
12  
13 using a competing-risks method, and to construct a comprehensive nomogram that  
14  
15 presents the impacts of these prognostic factors in order to guide clinical work.  
16  
17  
18

## 19 **Methods**

### 20 Database and patients

21  
22 The Surveillance, Epidemiology, and End Results (SEER) program has yielded a  
23  
24 database of all cancer patients in 18 defined geographic regions of the United States  
25  
26 collected by the National Cancer Institute. It is the largest cancer registry in the  
27  
28 United States and includes information on approximately 28% of the United States  
29  
30 population. Because part of the SEER research data is publicly available, no informed  
31  
32 consent or institutional review board approval is required when analyzing the data.  
33  
34 We additionally requested chemotherapy data for inclusion in our research and  
35  
36 obtained a license for using SEER software.[14, 15]  
37  
38  
39  
40  
41  
42  
43  
44

45 We selected UTUC patients from the latest edition of the SEER database that  
46  
47 covers from 1975 to 2016. The primary sites were extracted using the SEER codes of  
48  
49 “C65.9-Renal pelvis” and “C66.9-Ureter.” We included all of the histological  
50  
51 subtypes of UTUC, according to the ICD-O-3 (third revision of the International  
52  
53 Classification of Diseases for Oncology). The following demographic indicators were  
54  
55 selected: age at diagnosis, sex, race, and marital status. Primary site, histological  
56  
57  
58  
59  
60



1  
2  
3  
4 grade, tumor size, laterality, distant metastasis, surgery status, radiotherapy status,  
5  
6 chemotherapy status, number of lymph nodes examined (LNE), lymph nodes positive  
7  
8 (LNP), and lymph nodes ratio (LNR; calculated as the number of LNP divided by  
9  
10 LNE) were also included as pathological characteristics. We divided the ages into  
11  
12 four groups: 20–40, 40–60, 60–80, and >80 years. The tumor size was categorized  
13  
14 into three groups: <2, 2–4, and ≥4 cm.[1, 16] The study outcomes included survival,  
15  
16 CSD, and death due to other causes (DOC). The survival time was reported in the  
17  
18 available data in months.  
19  
20  
21  
22  
23

#### 24 Exclusion criteria

25  
26  
27 Our preliminary selection of the above methods initially identified 13,581  
28  
29 patients. Then, in order to ensure the accuracy of the study, the exclusion criteria for  
30  
31 the study data are as follows: unknown histological grade, unknown tumor size, and  
32  
33 unknown lymph nodes status. The specific data selection process is shown in  
34  
35 Figure 1. We finally chose 2576 patients for inclusion in follow-up investigations.  
36  
37  
38  
39

40 Figure 1

#### 41 42 43 Statistical methods

44  
45 We randomly divided the 2576 eligible patients into 2 groups using R software  
46  
47 (version 3.5.3, The R Foundation for Statistical Computing, Vienna, Austria;  
48  
49 <http://www.r-project.org>): 70% (n=1803) in the training cohort and 30% (n=773) in  
50  
51 the validation cohort. We first described the basic composition of each factor in the  
52  
53 two patient cohorts using SPSS software (version 23.0, Armonk, NY: IBM Corp). The  
54  
55 LNR was expressed as median and interquartile-range values, while categorical  
56  
57  
58  
59  
60

1  
2  
3  
4 variables were represented as percentages.  
5

6  
7 In a univariate analysis, R software was used to calculate the CIF to describe the  
8  
9 probability of death, while SAS software (SAS Institute, USA) was used to implement  
10  
11 Gray's test to determine the difference in CIF between each variable group. We then  
12  
13 performed a multivariate analysis using SAS. We used the Fine-Gray subdistribution  
14  
15 proportional-hazards model for the multivariate analysis and compared the results  
16  
17 with using traditional Cox proportional-hazards models. Applying the standard Cox  
18  
19 regression method ignores the presence of competing risks and hence overestimates  
20  
21 the actual incidence of beneficial events, and so may lead to inappropriate risk  
22  
23 stratification.[17] Several studies have confirmed that different approaches can be  
24  
25 used in competing-risks settings for multivariate survival analysis, but subdistribution  
26  
27 proportional-hazards model have been found to be the best predictors of survival  
28  
29 probability.[18]  
30  
31  
32  
33  
34  
35  
36

37  
38 Finally, the multivariate analysis results were used to construct a nomogram of  
39  
40 the 3, 5, and 8 years CSD rates, which was tested using the validation cohort. We used  
41  
42 the concordance index (C-index) and calibration plots to evaluate the differentiation  
43  
44 ability and consistency of the established model.  
45  
46  
47

48  
49 All statistical tests were conducted using SPSS (version 23), R software  
50  
51 (version 3.5.3), and SAS (version 9.4). Probability values of  $P < 0.05$  were considered  
52  
53 statistically significant, and all tests were two-sided. The SEER database can be  
54  
55 accessed free of charge, and this study was exempted from obtaining informed  
56  
57 consent.  
58  
59  
60

## Patient and public involvement

This research was done without patient involvement. Patients were not invited to comment on the study design and were not consulted to develop patient-relevant outcomes or interpret the results. Patients were not invited to contribute to the writing or editing of this document for readability or accuracy.

## Results

### Patient characteristics

The composition of each variable for the 2576 patients in the training and validation cohorts is presented in Table 1. This table indicates that the largest proportions of the patients were aged 60–80 years (63.0% and 61.4% in the training and validation cohorts, respectively), male (both 59.6%), white (85.0% and 85.6%), and married (86.9% and 87.5%). The main UTUC sites were in the renal pelvis (64.4% and 61.6%, respectively, in the training and validation cohorts), with the rest in the ureter. Majority of patients were in the undifferentiated stage (56.8% and 58.7%), and most of the tumors in both cohorts were larger than 4 cm. Unilateral cases were distributed relatively uniformly, with the cancer on the left accounting for 55.6% in the training cohort, and 52.9% in the validation cohort. Most patients in both cohorts had received surgery, whereas a few patients had received radiotherapy or chemotherapy. Only about 9% of patients had distant metastasis. In the training and validation cohorts, LNE was mostly within the range of 1–3 (55.6% and 56.8%, respectively); the proportions of LNP were 36.0% and 33.1%, respectively; the

1  
2  
3  
4 median LNRs were 0.00 (range, 0.00–0.46) and 0.00 (range, 0.00–0.36), respectively.  
5

6 Table 1  
7

#### 8 9 Univariate analysis

10  
11 We calculated the 3, 5, and 8 years cumulative incidence rates of CSD and DOC.  
12  
13 Laterality and marital status were not related to either outcome ( $P>0.05$ ), while sex,  
14  
15 race, histological grade, chemotherapy status, LNP, and LNR were related to both  
16  
17 outcomes ( $P<0.05$ ). Age was significantly related to DOC, while primary site, tumor  
18  
19 size, surgery status, radiotherapy status, distant metastasis, and LNE were  
20  
21 significantly related to CSD. The CIF curves of variables specifically related to CSD  
22  
23 are shown in Figure 2, while other figures are provided in Appendix 1. The  
24  
25 cumulative incidence rates of CSD and DOC are compared in Table 2.  
26  
27  
28  
29  
30  
31

32 Figure 2, Table 2  
33

#### 34 35 36 37 38 Multivariate analysis

39  
40 Our comparison of the competing-risks model with a traditional Cox regression  
41  
42 model yielded the results presented in Table 3. The Cox regression model showed that  
43  
44 tumor size, chemotherapy status, distant metastasis, and LNP were prognostic factors  
45  
46 for UTUC ( $P<0.001$ ). We then constructed the Fine-Gray subdistribution  
47  
48 proportional-hazards model. The multivariate competing-risks analysis indicated that  
49  
50 sex (hazard ratio [HR]=1.308 for female, 95% confidence interval [CI]=1.093–1.564),  
51  
52 race (HR=1.670 for other races, 95% CI=1.290–2.162), tumor size (HR=1.656 for 2–  
53  
54 4 cm, 95% CI=1.161–2.363; HR=2.065 for  $\geq 4$  cm, 95% CI=1.461–2.918), distant  
55  
56  
57  
58  
59  
60

1  
2  
3  
4 metastasis (HR=2.233 for distant, 95% CI=1.706–2.923), LNE (HR=0.711 for 4–7  
5  
6 lymph nodes, 95% CI=0.545–0.928; HR=0.698 for  $\geq 8$  lymph nodes, 95% CI=0.540–  
7  
8 0.903), and LNP (HR=2.252, 95% CI=1.580–3.211) were prognostic factors affecting  
9  
10 UTUC, as presented in Table 3.  
11  
12

13  
14 

|         |
|---------|
| Table 3 |
|---------|

  
15  
16  
17  
18  
19

### 20 Construction and verification of the nomogram

21  
22 Figure 3 shows the nomogram we constructed according to the results of the  
23  
24 multivariate competing-risks analysis for predicting the CSD probabilities at 3, 5, and  
25  
26 8 years. The figure shows that LNP had the greatest impact on the probability of CSD,  
27  
28 followed by distant metastasis, tumor size, race, LNE, and sex.  
29  
30  
31

32 We used the validation cohort to verify the nomogram after establishing it. The 3,  
33  
34 5, and 8 years C-indexes were 0.723, 0.707, and 0.696 for the training cohort,  
35  
36 respectively, and 0.708, 0.702, and 0.701 for the validation cohort. All of these values  
37  
38 exceed 0.6, which indicates that the model has good discrimination ability. We then  
39  
40 tested the prediction accuracy of the model. As shown in Figure 4, the 3, 5, and 8  
41  
42 years calibration plots for both cohorts were very close to the standard straight line,  
43  
44 demonstrating that the model was well calibrated.  
45  
46  
47  
48  
49

50 

|              |
|--------------|
| Figures 3, 4 |
|--------------|

  
51  
52  
53  
54  
55

## 56 Discussion

57  
58 The increasing incidence of UTUC[19] makes it necessary to further explore the  
59  
60

1  
2  
3  
4 prognostic factors for UTUC. The present study used a competing-risks model to  
5  
6 more accurately explore the prognostic factors for UTUC, and used these factors to  
7  
8 construct a nomogram to provide clinicians with direct guidance when they are  
9  
10 making relevant predictions.  
11  
12

13  
14 The application of study criteria resulted in the inclusion in 2576 patients from  
15  
16 the SEER database, and 1542 of these patients died during the follow-up, although  
17  
18 only 750 of the deaths were related to UTUC. This means that the number of DOC  
19  
20 patients was almost the same as that for CSD. In this situation, if the traditional K-M  
21  
22 or Cox survival analysis had been adopted, both death outcomes would have been  
23  
24 considered to be related to UTUC.[20, 21] This would overestimate the proportion of  
25  
26 CSD patients and hence not truly reflect the prognosis of CSD. We overcame this  
27  
28 shortcoming by using a subdistribution proportional-hazards model, which can  
29  
30 properly address the situation where the available data are related to multiple potential  
31  
32 outcomes.[22] This method was first proposed by Fine and Gray, and has also been  
33  
34 applied in some previous studies.[23–25] In the presence of competing risks, we used  
35  
36 the CIF and the subdistribution proportional-hazards model to explore the impact of  
37  
38 various factors on CSD.  
39  
40  
41  
42  
43  
44  
45  
46  
47

48 The univariate analysis results showed that sex, race, primary site, histological  
49  
50 grade, tumor size, surgery status, radiotherapy status, chemotherapy status, distant  
51  
52 metastasis, LNE, LNP, and LNR are influencing factors for CSD, while age, sex, race,  
53  
54 histological grade, chemotherapy status, LNP, and LNR are influencing factors for  
55  
56 DOC. The multivariate Cox regression model results showed that tumor size, distant  
57  
58  
59  
60

1  
2  
3  
4 metastasis, chemotherapy status, and LNP are prognostic factors for CSD. The  
5  
6 subdistribution proportional-hazards model showed that sex, race, tumor size, distant  
7  
8 metastasis, LNE, and LNP are independent prognostic factors for CSD.  
9  
10

11 Age is a prognostic factor for most cancers, and this has also found to be the case  
12  
13 for CSD.[26, 27] However, our univariate analysis results showed that age is only a  
14  
15 prognosis factor for DOC, and the multivariate analysis did not include age as a  
16  
17 variable, indicating that age is not a separate prognosis factor for UTUC. Previous  
18  
19 studies may have ignored competing events, and sex and race have always been  
20  
21 controversial prognostic factors. One study showed that age and race are preoperative  
22  
23 prognostic factors for UTUC patients.[28] In contrast, another study found no  
24  
25 statistically significant differences in survival between males and females.[29] The  
26  
27 competing-risks model in our study showed that sex and race are risk factors for  
28  
29 UTUC. However, since most of the patients included in the SEER database are white,  
30  
31 the results regarding race need to be further validated.  
32  
33  
34  
35  
36  
37  
38  
39

40 Tumor size has always been a prognostic factor. One study found 5-year  
41  
42 recurrence-free survival rates for patients with tumor sizes  $<3$  cm and  $\geq 3$  cm of 46.9%  
43  
44 and 25.8%, respectively.[30] The univariate and multivariate analyses performed in  
45  
46 the present study indicated that tumor size is an influencing factor for CSD, with the  
47  
48 prognosis being worse for tumors larger than 2 cm. In terms of treatment methods,  
49  
50 surgery status, radiotherapy status, and chemotherapy status were not influencing  
51  
52 factors for CSD in the subdistribution proportional-hazards model. This conflicts with  
53  
54 some previous findings,[31–33] suggesting that traditional Cox regression analysis  
55  
56  
57  
58  
59  
60

1  
2  
3  
4 overestimates the effects of surgery, radiotherapy, and chemotherapy. Of course, the  
5  
6 relative lack of information on the radiotherapy status and chemotherapy status in the  
7  
8 SEER database may also lead to inaccurate results, and so further exploration of these  
9  
10 indicators is needed.  
11  
12

13  
14 Some indicators related to lymph nodes (e.g., distant lymph node metastasis,  
15  
16 LNP, and LNE) have been found to be important clinical information for the  
17  
18 prognosis of cancer, but whether they are independent prognostic factors for UTUC  
19  
20 has not been determined. One study found that lymph node metastases were  
21  
22 significantly associated with reduced disease-specific survival in univariate  
23  
24 analysis.[34] Our research also found that distant metastasis is an important  
25  
26 prognostic factor for CSD, in both the univariate and multivariate analyses.  
27  
28  
29  
30  
31

32 It is worth noting that very few studies have investigated LNP, LNE, and LNR.  
33  
34 Our study is the first to use the SEER database to analyze the prognostic impact of  
35  
36 these indicators on UTUC, and the results may be more accurate than those of studies  
37  
38 involving small samples. LNR is an emerging indicator that has been regarded as a  
39  
40 prognostic factor in rectal cancer and breast cancer.[35, 36] We found that LNR was  
41  
42 an influencing factor for UTUC in the univariate analysis but not in the multivariate  
43  
44 analysis. Moreover, both LNE and LNP entered the subdistribution  
45  
46 proportional-hazards model, which showed that after adjusting for the effects of LNE  
47  
48 and LNP, LNR was no longer an independent prognostic indicator. After excluding  
49  
50 competing events, LNE was an independent prognostic factor for UTUC. It can be  
51  
52 seen from the results that a higher LNE decreases the probability of CSD. However,  
53  
54  
55  
56  
57  
58  
59  
60



1  
2  
3  
4 LNE did not influence DOC. This shows that LNE is more specific for UTUC, and so  
5  
6 more attention should be paid to its role as a prognostic factor for UTUC patients in  
7  
8 the future. LNP was a prognostic factor in all of the analyses, indicating that it greatly  
9  
10 influences the prognosis of UTUC.  
11  
12  
13

14 We utilized the results from the above-mentioned subdistribution  
15  
16 proportional-hazards model to construct a nomogram that graphically presents the  
17  
18 degrees of influence of various prognostic factors. This nomogram also integrates  
19  
20 various indicators to predict the 3, 5, and 8 years probabilities of CSD. The C-indexes  
21  
22 for the nomogram all exceeded 0.6, demonstrating that the model provides a good fit  
23  
24 to the available data. The prediction calibration curves in Figure 4 are very close to  
25  
26 the standard curve, which indicates that the nomogram has good predictive ability.  
27  
28 The results for the validation cohort also show that the model is stable. This model  
29  
30 can therefore help clinicians to quickly and easily determine the prognosis of  
31  
32 individual patients and provide guidance in their clinical decision-making. However,  
33  
34 the stability of the model needs further verification.  
35  
36  
37  
38  
39  
40  
41  
42

43 Inevitably, our research had some limitations. First, the established model is not  
44  
45 comprehensive enough, because the SEER database does not include all prognostic  
46  
47 factors for UTUC. Second, the data available on the treatment status are not  
48  
49 sufficiently detailed to distinguish the impact of various treatment plans. Finally, the  
50  
51 model requires prospective studies to confirm its reliability.  
52  
53  
54

## 55 **5. Conclusions**

56  
57  
58 In summary, this study used a competing-risks model to determine the prognostic  
59  
60

1  
2  
3  
4 factors for UTUC. The subdistribution proportional-hazards model showed that sex,  
5  
6 race, tumor size, distant metastasis, LNE, and LNP were associated with CSD, while  
7  
8 LNR was not. The constructed nomogram can predict the 3, 5, and 8 years CSD  
9  
10 probabilities of patients based on these relevant factors, which can support clinicians  
11  
12 to make better judgments of the survival rates of individual patients.  
13  
14  
15  
16  
17  
18

### 19 **Footnotes**

20  
21  
22 **Contributorship statement:** JL, CZL, and XL designed the study; QH, FFZ, and  
23  
24 XJF collected and analyzed the data; CZL and XL drafted the initial manuscript;  
25  
26 DDH, FSX, and SZ reviewed and edited the article; All authors read and approved the  
27  
28 final manuscript.  
29  
30  
31

32  
33 **Funding:** The study was supported by The National Social Science Foundation of  
34  
35 China (grant no. 16BGL183).  
36  
37

38 **Competing interests:** The authors declare that they have no competing interests.  
39

40  
41 **Availability of data and materials:** Ethical approval was waived, and informed  
42  
43 consent was unnecessary because the SEER research data are anonymous and  
44  
45 publicly available.  
46  
47

48 **Patient consent for publication:** Not required.  
49

50  
51 **Data availability statement:** The datasets generated and analyzed during the current  
52  
53 study are available from the corresponding author on reasonable request.  
54  
55

56  
57 **Licence statement:** Other than as permitted in any relevant BMJ Author's Self  
58  
59 Archiving Policies, I confirm this Work has not been accepted for publication  
60

1  
2  
3  
4 elsewhere, is not being considered for publication elsewhere and does not duplicate  
5  
6 material already published. I confirm all authors consent to publication of this Work  
7  
8 and authorise the granting of this licence.  
9  
10

## 11 **References**

- 14 1. Roupret M, Babjuk M, Comperat E, Zigeuner R, Sylvester RJ, Burger M, Cowan NC,  
15  
16 Gontero P, Van Rhijn BWG, Mostafid AH et al. European association of urology  
17  
18 guidelines on upper urinary tract urothelial carcinoma: 2017 update. *Eur Urol*.  
19  
20 2018;73(1):111-22.  
21  
22
- 25 2. JJ M, LM E. - upper tract urothelial neoplasms: Incidence and survival during the last 2.  
26  
27 D - 0376374. (- 0022-5347 (Print)):- 1523-5.  
28  
29
- 30 3. Roupret M, Babjuk M, Compérat E, Zigeuner R, Sylvester RJ, Burger M, Cowan NC,  
31  
32 Böhle A, Van Rhijn BWG, Kaasinen E et al. European association of urology guidelines  
33  
34 on upper urinary tract urothelial cell carcinoma: 2015 update. *European Urology*.  
35  
36 2015;68(5):868-79.  
37  
38
- 40 4. Siegel RL, Miller KD, Jemal A. Cancer statistics, 2019. *CA Cancer J Clin*.  
41  
42 2019;69(1):7-34.  
43  
44
- 45 5. Raman JD, Messer J, Sielatycki JA, Hollenbeak CS. Incidence and survival of patients  
46  
47 with carcinoma of the ureter and renal pelvis in the USA, 1973-2005. *BJU Int*.  
48  
49 2011;107(7):1059-64.  
50  
51
- 52 6. Green DA, Rink M, Xylinas E, Matin SF, Stenzl A, Roupret M, Karakiewicz PI, Scherr  
53  
54 DS, Shariat SF. Urothelial carcinoma of the bladder and the upper tract: Disparate twins.  
55  
56 *Journal of Urology*. 2013;189(4):1214-21.  
57  
58  
59  
60

- 1  
2  
3  
4 7. Lughezzani G, Jeldres C, Isbarn H, Shariat SF, Sun M, Pharand D, Widmer H, Arjane P,  
5  
6 Graefen M, Montorsi F et al. A critical appraisal of the value of lymph node dissection at  
7  
8 nephroureterectomy for upper tract urothelial carcinoma. *Urology*. 2010;75(1):118-24.  
9
- 10  
11 8. Novara G, Matsumoto K, Kassouf W, Walton TJ, Fritsche HM, Bastian PJ,  
12  
13 Martinez-Salamanca JI, Seitz C, Lemberger RJ, Burger M et al. Prognostic role of  
14  
15 lymphovascular invasion in patients with urothelial carcinoma of the upper urinary tract:  
16  
17 An international validation study. *Eur Urol*. 2010;57(6):1064-71.  
18  
19
- 20  
21 9. Remzi M, Haitel A, Margulis V, Karakiewicz P, Montorsi F, Kikuchi E, Zigeuner R,  
22  
23 Weizer A, Bolenz C, Bensalah K et al. Tumour architecture is an independent predictor of  
24  
25 outcomes after nephroureterectomy: A multi-institutional analysis of 1363 patients. *BJU*  
26  
27 *Int*. 2009;103(3):307-11.  
28  
29
- 30  
31 10. Kim HT. Cumulative incidence in competing risks data and competing risks regression  
32  
33 analysis. *Clin Cancer Res*. 2007;13(2 Pt 1):559-65.  
34  
35
- 36  
37 11. PC A, JP F. - practical recommendations for reporting fine-gray model analyses for  
38  
39 competing. D - 8215016. (- 1097-0258 (Electronic)):- 4391-400.  
40  
41
- 42  
43 12. Kattan MW, Heller G, Brennan MF. A competing-risks nomogram for sarcoma-specific  
44  
45 death following local recurrence. *Stat Med*. 2003;22(22):3515-25.  
46  
47
- 48  
49 13. Abdollah F, Sun M, Schmitges J, Tian Z, Jeldres C, Briganti A, Shariat SF, Perrotte P,  
50  
51 Montorsi F, Karakiewicz PI. Cancer-specific and other-cause mortality after radical  
52  
53 prostatectomy versus observation in patients with prostate cancer: Competing-risks  
54  
55 analysis of a large north american population-based cohort. *Eur Urol*. 2011;60(5):920-30.  
56  
57
- 58  
59 14. Surveillance Research Program, National Cancer Institute SEER\*Stat software  
60

- (seer.cancer.gov/seerstat) version <SEER\*Stat 8.3.6>.
15. Yang J, Liu QQ, Geng H, Tian GX, Zeng XT, Lyu J. SEER database application and data extraction methods and processes. *Chinese Journal of Evidence-Based Cardiovascular Medicine*, 2018,10(07):781-784.
  16. Pieras E, Frontera G, Ruiz X, Vicens A, Ozonas M, Pizá P. Concomitant carcinoma in situ and tumour size are prognostic factors for bladder recurrence after nephroureterectomy for upper tract transitional cell carcinoma. *BJU Int*. 2010;106(9):1319–1323.
  17. Wolbers M, Koller MT, Wittman JC, Steyerberg EW. Prognostic models with competing risks: Methods and application to coronary risk prediction. *Epidemiology*. 2009;20(4):555-61.
  18. Noordzij M, Leffondre K, van Stralen KJ, Zoccali C, Dekker FW, Jager KJ. When do we need competing risks methods for survival analysis in nephrology? *Nephrology Dialysis Transplantation*. 2013;28(11):2670-7.
  19. Soria F, Shariat SF, Lerner SP, Fritsche H-M, Rink M, Kassouf W, Spiess PE, Lotan Y, Ye D, Fernández MI et al. Epidemiology, diagnosis, preoperative evaluation and prognostic assessment of upper-tract urothelial carcinoma (utuc). *World Journal of Urology*. 2016;35(3):379-87.
  20. Ludbrook J, Royse AG. Analysing clinical studies: Principles, practice and pitfalls of kaplan–meier plots. *ANZ Journal of Surgery*. 2008;78(3):204-10.
  21. Putter H, Fiocco M, Geskus RB. Tutorial in biostatistics: Competing risks and multi-state models. *Statistics in Medicine*. 2007;26(11):2389-430.
  22. Fine JP, Gray RJ. A proportional hazards model for the subdistribution of a competing

- 1  
2  
3  
4 risk. *Journal of the American Statistical Association*. 1999;94(446):496-509.  
5  
6  
7 23. Wolbers M, Koller MT, Wittteman JCM, Steyerberg EW. Prognostic models with  
8  
9 competing risks: Methods and application to coronary risk prediction. *Epidemiology*.  
10  
11 2009;20(4):555-61.  
12  
13  
14 24. Kutikov A, Egleston BL, Canter D, Smaldone MC, Wong YN, Uzzo RG. Competing  
15  
16 risks of death in patients with localized renal cell carcinoma: A comorbidity based model.  
17  
18 *Journal Of Urology*. 2012;188(6):2077-83.  
19  
20  
21  
22 25. Bradshaw PT, Stevens J, Khankari N, Teitelbaum SL, Neugut AI, Gammon MD.  
23  
24 Cardiovascular disease mortality among breast cancer survivors. *Epidemiology*.  
25  
26 2016;27(1):6-13.  
27  
28  
29  
30 26. Margulis V, Shariat SF, Matin SF, Kamat AM, Zigeuner R, Kikuchi E, Lotan Y, Weizer  
31  
32 A, Raman JD, Wood CG et al. Outcomes of radical nephroureterectomy: A series from  
33  
34 the upper tract urothelial carcinoma collaboration. *Cancer*. 2009;115(6):1224-33.  
35  
36  
37  
38 27. Yap SA, Schupp CW, Chamie K, Evans CP, Koppie TM. Effect of age on transitional cell  
39  
40 carcinoma of the upper urinary tract: Presentation, treatment, and outcomes. *Urology*.  
41  
42 2011;78(1):87-92.  
43  
44  
45  
46 28. Leow JJ, Orsola A, Chang SL, Bellmunt J. A contemporary review of management and  
47  
48 prognostic factors of upper tract urothelial carcinoma. *Cancer Treat Rev*.  
49  
50 2015;41(4):310-9.  
51  
52  
53  
54 29. Lughezzani G, Sun M, Perrotte P, Shariat SF, Jeldres C, Budäus L, Latour M, Widmer H,  
55  
56 Duclos A, Bénard F et al. Gender-related differences in patients with stage i to iii upper  
57  
58 tract urothelial carcinoma: Results from the surveillance, epidemiology, and end results  
59  
60

- 1  
2  
3  
4 database. *Urology*. 2010;75(2):321-7.  
5  
6  
7 30. Espiritu PN, Sverrisson EF, Sexton WJ, Pow-Sang JM, Poch MA, Dhillon J, Spiess PE.  
8  
9 Effect of tumor size on recurrence-free survival of upper tract urothelial carcinoma  
10 following surgical resection. *Urol Oncol*. 2014;32(5):619-24.  
11  
12  
13  
14 31. T S, RE K, J B, M R, JJ L, SR L, MW V, MA P, N H, AS K et al. - effectiveness of  
15  
16  
17  
18  
19  
20  
21  
22  
23  
24  
25  
26  
27  
28  
29  
30  
31  
32  
33  
34  
35  
36  
37  
38  
39  
40  
41  
42  
43  
44  
45  
46  
47  
48  
49  
50  
51  
52  
53  
54  
55  
56  
57  
58  
59  
60
31. T S, RE K, J B, M R, JJ L, SR L, MW V, MA P, N H, AS K et al. - effectiveness of  
adjuvant chemotherapy after radical nephroureterectomy for. D - 8309333. (- 1527-7755  
(Electronic)):- 852-60.
32. Leow JJ, Martin-Doyle W, Fay AP, Choueiri TK, Chang SL, Bellmunt J. A systematic  
review and meta-analysis of adjuvant and neoadjuvant chemotherapy for upper tract  
urothelial carcinoma. *European Urology*. 2014;66(3):529-41.
33. Roupret M, Babjuk M, Comperat E, Zigeuner R, Sylvester R, Burger M, Cowan N, Bohle  
A, Van Rhijn BWG, Kaasinen E et al. European guidelines on upper tract urothelial  
carcinomas: 2013 update. *European Urology*. 2013;63(6):1059-71.
34. Bolenz C, Fernández MI, Trojan L, Herrmann E, Becker A, Weiss C, Alken P, Ströbel P,  
Michel MS. Lymphovascular invasion and pathologic tumor stage are significant  
outcome predictors for patients with upper tract urothelial carcinoma. *Urology*.  
2008;72(2):364-9.
35. Jin C, Deng X, Li Y, He W, Yang X, Liu J. Lymph node ratio is an independent  
prognostic factor for rectal cancer after neoadjuvant therapy: A meta-analysis. *J Evid  
Based Med*. 2018;11(3):169-75.
36. Vinh-Hung V, Verkooijen HM, Fioretta G, Neyroud-Caspar I, Rapiti E, Vlastos G,  
Deglise C, Usel M, Lutz JM, Bouchardy C. Lymph node ratio as an alternative to pn

1  
2  
3  
4 staging in node-positive breast cancer. J Clin Oncol. 2009;27(7):1062-8.  
5  
6  
7  
8  
9  
10  
11  
12  
13  
14  
15  
16  
17  
18  
19  
20  
21  
22  
23  
24  
25  
26  
27  
28  
29  
30  
31  
32  
33  
34  
35  
36  
37  
38  
39  
40  
41  
42  
43  
44  
45  
46  
47  
48  
49  
50  
51  
52  
53  
54  
55  
56  
57  
58  
59  
60

For peer review only



Table 1 The basic characteristics of the patients in this study.

| Variable                 | Training Cohort | Validation Cohort |
|--------------------------|-----------------|-------------------|
| Number of Patients n (%) | 1803(70)        | 773(30)           |
| Age of diagnosis n (%)   |                 |                   |
| 20-39                    | 8(0.4)          | 5(0.6)            |
| 40-59                    | 270(15.0)       | 130(16.8)         |
| 60-79                    | 1135(63.0)      | 475(61.4)         |
| ≥80                      | 390(21.6)       | 163(21.1)         |
| Sex n (%)                |                 |                   |
| Male                     | 1075(59.6)      | 461(59.6)         |
| Female                   | 728(40.4)       | 312(40.4)         |
| Race n (%)               |                 |                   |
| White                    | 1532(85.0)      | 662(85.6)         |
| Black                    | 95(5.3)         | 35(4.5)           |
| Other                    | 176(9.8)        | 76(9.8)           |
| Marital status n (%)     |                 |                   |
| Married                  | 1566(86.9)      | 676(87.5)         |
| Single                   | 166(9.2)        | 70(9.1)           |
| Others                   | 71(3.9)         | 27(3.5)           |
| Site n (%)               |                 |                   |
| Renal pelvis             | 1161(64.4)      | 476(61.6)         |
| Ureter                   | 642(35.6)       | 297(38.4)         |
| Grade n (%)              |                 |                   |
| Well                     | 50(2.8)         | 13(1.7)           |
| Moderate                 | 145(8.0)        | 73(9.4)           |
| Poor                     | 584(32.4)       | 233(30.1)         |
| Undifferential           | 1024(56.8)      | 454(58.7)         |
| Size n (%)               |                 |                   |
| <2                       | 254(14.1)       | 114(14.7)         |
| [2,4)                    | 584(32.4)       | 243(31.4)         |
| ≥4                       | 965(53.5)       | 416(53.8)         |
| Laterality n (%)         |                 |                   |
| Left                     | 1002(55.6)      | 409(52.9)         |
| Right                    | 801(44.4)       | 364(47.1)         |
| Surgery n (%)            |                 |                   |
| Yes                      | 1791(99.3)      | 768(99.4)         |
| NO/Unknown               | 12(0.7)         | 5(0.6)            |
| Radiotherapy n (%)       |                 |                   |
| Yes                      | 134(7.4)        | 46(6.0)           |
| NO/Unknown               | 1669(92.6)      | 727(94.0)         |
| Chemotherapy n (%)       |                 |                   |
| Yes                      | 566(31.4)       | 236(30.5)         |

|                          |                 |                 |
|--------------------------|-----------------|-----------------|
| NO/Unknown               | 1237(68.6)      | 537(69.5)       |
| Distant metastasis n (%) |                 |                 |
| No                       | 1638(90.8)      | 703(90.9)       |
| Yes                      | 165(9.2)        | 70(9.1)         |
| LNE n (%)                |                 |                 |
| 1-3                      | 1003(55.6)      | 439(56.8)       |
| 4-7                      | 343(19.0)       | 164(21.2)       |
| $\geq 8$                 | 457(25.3)       | 170(22.0)       |
| LNP n (%)                |                 |                 |
| No                       | 1154(64.0)      | 517(66.9)       |
| Yes                      | 649(36.0)       | 256(33.1)       |
| LNR n (%)                | 0.00(0.00-0.46) | 0.00(0.00-0.36) |

For peer review only

Table 2 The cumulative incidences of CSD and DOC among patients with UTUC.

| Variables      | Cancer-specific death (%) |                           |                           |        | Death due to other causes (%) |                           |                           |        |
|----------------|---------------------------|---------------------------|---------------------------|--------|-------------------------------|---------------------------|---------------------------|--------|
|                | 3-Year (95%CI)            | 5-Year (95%CI)            | 8-Year (95%CI)            | P      | 3-Year (95%CI)                | 5-Year (95%CI)            | 8-Year (95%CI)            | P      |
| Age            |                           |                           |                           | 0.368  |                               |                           |                           | <0.001 |
| 20-39          | 16.667<br>(13.333-20.000) | 33.333<br>(29.065-37.602) | -                         |        | -                             | -                         | -                         |        |
| 40-59          | 31.794<br>(31.199-32.388) | 34.798<br>(34.180-35.415) | 36.661<br>(36.025-37.298) |        | 9.094<br>(8.731-9.458)        | 14.705<br>(14.231-15.178) | 19.845<br>(19.278-20.412) |        |
| 60-79          | 24.599<br>(24.334-24.865) | 29.482<br>(29.189-29.775) | 32.246<br>(31.930-32.563) |        | 21.973<br>(21.716-22.229)     | 28.879<br>(28.582-29.175) | 34.133<br>(33.794-34.471) |        |
| ≥80            | 28.461<br>(27.991-28.931) | 32.050<br>(31.552-32.548) | 34.019<br>(33.499-34.540) |        | 35.067<br>(34.566-35.569)     | 42.984<br>(42.445-43.524) | 53.563<br>(52.972-54.153) |        |
| Sex            |                           |                           |                           | <0.001 |                               |                           |                           | <0.001 |
| Male           | 23.573<br>(23.303-23.843) | 27.370<br>(27.078-27.662) | 30.109<br>(29.794-30.424) |        | 25.258<br>(24.982-25.535)     | 33.576<br>(33.258-33.893) | 40.036<br>(39.680-40.393) |        |
| Female         | 30.823<br>(30.469-31.177) | 35.953<br>(35.572-36.334) | 37.895<br>(37.499-38.292) |        | 19.189<br>(18.886-19.492)     | 24.057<br>(23.715-24.398) | 30.607<br>(30.198-31.016) |        |
| Race           |                           |                           |                           | <0.001 |                               |                           |                           | <0.001 |
| White          | 24.930<br>(24.701-25.158) | 28.718<br>(28.472-28.964) | 30.774<br>(30.513-31.035) |        | 24.031<br>(23.804-24.259)     | 31.338<br>(31.079-31.597) | 38.267<br>(37.969-38.565) |        |
| Black          | 27.787<br>(26.808-28.766) | 37.875<br>(36.772-38.978) | 43.315<br>(42.144-44.486) |        | 21.152<br>(20.279-22.025)     | 25.483<br>(24.524-26.442) | 27.433<br>(26.420-28.446) |        |
| Other          | 39.718<br>(38.935-40.500) | 45.609<br>(44.784-46.435) | 49.063<br>(48.199-49.926) |        | 12.901<br>(12.372-13.431)     | 17.675<br>(17.046-18.303) | 23.038<br>(22.291-23.786) |        |
| Marital status |                           |                           |                           | 0.531  |                               |                           |                           | 0.355  |
| Married        | 26.477                    | 30.515                    | 32.943                    |        | 22.980                        | 29.955                    | 36.394                    |        |

|  |                |                 |                 |                 |                 |                 |                 |       |
|--|----------------|-----------------|-----------------|-----------------|-----------------|-----------------|-----------------|-------|
|  |                | (26.245-26.708) | (30.267-30.764) | (32.678-33.207) | (22.759-23.202) | (29.702-30.207) | (36.104-36.684) |       |
|  |                | 27.825          | 34.957          | 38.136          | 19.018          | 25.826          | 32.010          |       |
|  | Single         | (27.105-28.544) | (34.148-35.766) | (37.289-38.984) | (18.387-19.648) | (25.087-26.565) | (31.153-32.868) |       |
|  |                | 24.022          | 28.842          | 28.842          | 28.182          | 33.171          | 42.216          |       |
|  | Others         | (22.916-25.129) | (27.608-30.076) | (27.608-30.076) | (27.029-29.335) | (31.893-34.450) | (40.728-43.704) |       |
|  | Site           |                 |                 |                 | <0.001          |                 |                 | 0.210 |
|  | Renal          | 30.419          | 34.855          | 37.540          | 22.712          | 28.631          | 34.427          |       |
|  | pelvis         | (30.141-30.698) | (34.558-35.151) | (37.227-37.852) | (22.458-22.966) | (28.346-28.915) | (34.103-34.751) |       |
|  |                | 19.306          | 23.420          | 25.261          | 23.014          | 31.767          | 39.588          |       |
|  | Ureter         | (18.978-19.634) | (23.053-23.788) | (24.867-25.654) | (22.662-23.365) | (31.352-32.182) | (39.107-40.070) |       |
|  | Grade          |                 |                 |                 | <0.001          |                 |                 | 0.047 |
|  | Well           | 10.783          | 10.783          | 14.410          | 15.456          | 23.935          | 40.376          |       |
|  |                | (9.858-11.708)  | (9.858-11.708)  | (13.262-15.558) | (14.364-16.549) | (22.568-25.301) | (38.543-42.210) |       |
|  | Moderate       | 11.662          | 14.471          | 17.975          | 10.494          | 16.779          | 28.067          |       |
|  |                | (11.110-12.214) | (13.847-15.094) | (17.254-18.695) | (9.960-11.029)  | (16.100-17.458) | (27.142-28.992) |       |
|  | Poor           | 28.630          | 32.995          | 34.980          | 24.378          | 31.083          | 36.517          |       |
|  |                | (28.249-29.012) | (32.590-33.399) | (34.560-35.399) | (24.016-24.740) | (30.679-31.487) | (36.077-36.957) |       |
|  |                | 28.159          | 33.075          | 35.658          | 24.112          | 31.206          | 37.198          |       |
|  | Undifferential | (27.863-28.455) | (32.751-33.398) | (35.308-36.008) | (23.830-24.395) | (30.882-31.531) | (36.817-37.580) |       |
|  | Size           |                 |                 |                 | <0.001          |                 |                 | 0.377 |
|  | <2             | 10.662          | 14.382          | 18.333          | 24.122          | 31.144          | 41.534          |       |
|  |                | (10.246-11.078) | (13.884-14.881) | (17.72-18.945)  | (23.544-24.699) | (30.482-31.806) | (40.717-42.352) |       |
|  | [2,4)          | 20.400          | 26.809          | 29.821          | 20.624          | 27.885          | 35.394          |       |
|  |                | (20.050-20.750) | (26.406-27.212) | (29.383-30.260) | (20.272-20.976) | (27.471-28.298) | (34.898-35.890) |       |
|  | ≥4             | 34.237          | 37.483          | 39.206          | 23.801          | 30.424          | 35.440          |       |
|  |                | (33.923-34.552) | (37.155-37.810) | (38.868-39.544) | (23.519-24.083) | (30.107-30.741) | (35.091-35.789) |       |

|    |                    |                 |                 |                 |                 |                 |                 |
|----|--------------------|-----------------|-----------------|-----------------|-----------------|-----------------|-----------------|
| 1  |                    |                 |                 |                 |                 |                 |                 |
| 2  |                    |                 |                 |                 |                 |                 |                 |
| 3  |                    |                 |                 |                 |                 |                 |                 |
| 4  |                    |                 |                 |                 |                 |                 |                 |
| 5  | Laterality         |                 |                 | 0.896           |                 |                 | 0.635           |
| 6  | Left               | 26.117          | 31.350          | 33.726          | 24.117          | 30.669          | 35.750          |
| 7  |                    | (25.828-26.405) | (31.034-31.667) | (33.391-34.062) | (23.836-24.399) | (30.353-30.986) | (35.394-36.106) |
| 8  | Right              | 26.973          | 30.190          | 32.640          | 21.157          | 28.446          | 36.696          |
| 9  |                    | (26.647-27.298) | (29.846-30.535) | (32.274-33.006) | (20.857-21.457) | (28.096-28.797) | (36.283-37.108) |
| 10 |                    |                 |                 |                 |                 |                 |                 |
| 11 | Surgery            |                 |                 | 0.029           |                 |                 | 0.132           |
| 12 | Yes                | 26.232          | 30.613          | 33.048          | 22.666          | 29.620          | 36.174          |
| 13 |                    | (26.016-26.447) | (30.380-30.846) | (32.800-33.296) | (22.460-22.872) | (29.384-29.856) | (35.903-36.445) |
| 14 | NO/Unknown         | 58.333          | -               | -               | 41.667          | -               | -               |
| 15 |                    | (54.877-61.790) |                 |                 | (38.639-44.695) |                 |                 |
| 16 | Radiotherapy       |                 |                 | <0.001          |                 |                 | 0.940           |
| 17 | Yes                | 42.957          | 47.953          | 49.418          | 26.414          | 32.064          | 34.468          |
| 18 |                    | (42.073-43.841) | (47.041-48.865) | (48.485-50.351) | (25.633-27.196) | (31.216-32.911) | (33.584-35.351) |
| 19 | NO/Unknown         | 25.142          | 29.398          | 31.898          | 22.510          | 29.506          | 36.371          |
| 20 |                    | (24.922-25.363) | (29.159-29.637) | (31.643-32.154) | (22.297-22.723) | (29.261-29.750) | (36.087-36.654) |
| 21 | Chemotherapy       |                 |                 | <0.001          |                 |                 | 0.007           |
| 22 | Yes                | 35.840          | 41.411          | 44.178          | 20.103          | 26.626          | 31.696          |
| 23 |                    | (35.412-36.268) | (40.954-41.868) | (43.698-44.658) | (19.747-20.459) | (26.209-27.042) | (31.233-32.159) |
| 24 | NO/Unknown         | 22.389          | 26.245          | 28.493          | 24.052          | 31.128          | 38.226          |
| 25 |                    | (22.145-22.633) | (25.980-26.510) | (28.210-28.776) | (23.800-24.303) | (30.844-31.413) | (37.896-38.556) |
| 26 | Distant metastasis |                 |                 | <0.001          |                 |                 | 0.905           |
| 27 | No                 | 22.843          | 27.444          | 29.995          | 22.251          | 29.517          | 36.603          |
| 28 |                    | (22.627-23.059) | (27.206-27.682) | (29.740-30.251) | (22.036-22.465) | (29.270-29.765) | (36.316-36.891) |
| 29 | Yes                | 62.766          | 64.400          | 65.218          | 28.317          | 31.513          | 32.330          |
| 30 |                    | (61.998-63.533) | (63.634-65.167) | (64.451-65.984) | (27.603-29.032) | (30.767-32.258) | (31.577-33.083) |
| 31 |                    |                 |                 |                 |                 |                 |                 |
| 32 |                    |                 |                 |                 |                 |                 |                 |
| 33 |                    |                 |                 |                 |                 |                 |                 |
| 34 |                    |                 |                 |                 |                 |                 |                 |
| 35 |                    |                 |                 |                 |                 |                 |                 |
| 36 |                    |                 |                 |                 |                 |                 |                 |
| 37 |                    |                 |                 |                 |                 |                 |                 |
| 38 |                    |                 |                 |                 |                 |                 |                 |
| 39 |                    |                 |                 |                 |                 |                 |                 |
| 40 |                    |                 |                 |                 |                 |                 |                 |
| 41 |                    |                 |                 |                 |                 |                 |                 |
| 42 |                    |                 |                 |                 |                 |                 |                 |
| 43 |                    |                 |                 |                 |                 |                 |                 |
| 44 |                    |                 |                 |                 |                 |                 |                 |
| 45 |                    |                 |                 |                 |                 |                 |                 |
| 46 |                    |                 |                 |                 |                 |                 |                 |

|    |     |                 |                 |                 |                 |                 |                 |
|----|-----|-----------------|-----------------|-----------------|-----------------|-----------------|-----------------|
| 1  |     |                 |                 |                 |                 |                 |                 |
| 2  |     |                 |                 |                 |                 |                 |                 |
| 3  |     |                 |                 |                 |                 |                 |                 |
| 4  |     |                 |                 |                 |                 |                 |                 |
| 5  | LNE |                 |                 | 0.002           |                 |                 | 0.699           |
| 6  |     | 29.182          | 34.316          | 36.877          | 21.861          | 29.193          | 36.619          |
| 7  | 1-3 | (28.887-29.478) | (33.998-34.633) | (36.544-37.210) | (21.592-22.130) | (28.884-29.501) | (36.264-36.974) |
| 8  |     | 22.696          | 26.540          | 28.034          | 26.331          | 30.175          | 35.705          |
| 9  | 4-7 | (22.224-23.168) | (26.019-27.061) | (27.481-28.588) | (25.828-26.835) | (29.629-30.720) | (35.077-36.333) |
| 10 |     | 23.311          | 26.017          | 28.677          | 22.268          | 30.242          | 34.775          |
| 11 | ≥8  | (22.893-23.728) | (25.572-26.462) | (28.189-29.165) | (21.859-22.678) | (29.759-30.725) | (34.235-35.315) |
| 12 |     |                 |                 |                 |                 |                 |                 |
| 13 | LNP |                 |                 | <0.001          |                 |                 | 0.009           |
| 14 |     | 16.502          | 21.003          | 23.860          | 18.979          | 27.239          | 35.417          |
| 15 | No  | (16.273-16.731) | (20.741-21.264) | (23.571-24.148) | (18.738-19.221) | (26.948-27.531) | (35.069-35.765) |
| 16 |     | 44.145          | 48.231          | 49.950          | 29.565          | 34.071          | 37.613          |
| 17 | Yes | (43.743-44.546) | (47.817-48.645) | (49.523-50.376) | (29.196-29.934) | (33.676-34.465) | (37.190-38.037) |
| 18 |     |                 |                 |                 |                 |                 |                 |
| 19 | LNR |                 |                 | <0.001          |                 |                 | <0.001          |
| 20 |     |                 |                 |                 |                 |                 |                 |
| 21 |     |                 |                 |                 |                 |                 |                 |
| 22 |     |                 |                 |                 |                 |                 |                 |
| 23 |     |                 |                 |                 |                 |                 |                 |
| 24 |     |                 |                 |                 |                 |                 |                 |
| 25 |     |                 |                 |                 |                 |                 |                 |
| 26 |     |                 |                 |                 |                 |                 |                 |
| 27 |     |                 |                 |                 |                 |                 |                 |
| 28 |     |                 |                 |                 |                 |                 |                 |
| 29 |     |                 |                 |                 |                 |                 |                 |
| 30 |     |                 |                 |                 |                 |                 |                 |
| 31 |     |                 |                 |                 |                 |                 |                 |
| 32 |     |                 |                 |                 |                 |                 |                 |
| 33 |     |                 |                 |                 |                 |                 |                 |
| 34 |     |                 |                 |                 |                 |                 |                 |
| 35 |     |                 |                 |                 |                 |                 |                 |
| 36 |     |                 |                 |                 |                 |                 |                 |
| 37 |     |                 |                 |                 |                 |                 |                 |
| 38 |     |                 |                 |                 |                 |                 |                 |
| 39 |     |                 |                 |                 |                 |                 |                 |
| 40 |     |                 |                 |                 |                 |                 |                 |
| 41 |     |                 |                 |                 |                 |                 |                 |
| 42 |     |                 |                 |                 |                 |                 |                 |
| 43 |     |                 |                 |                 |                 |                 |                 |
| 44 |     |                 |                 |                 |                 |                 |                 |
| 45 |     |                 |                 |                 |                 |                 |                 |
| 46 |     |                 |                 |                 |                 |                 |                 |

Table 3 Selected variables by proportional subdistribution hazard model and multivariate Cox regression model.

| Variables      | Proportional subdistribution hazards model |           |             |        | Cox regression model |           |              |       |
|----------------|--------------------------------------------|-----------|-------------|--------|----------------------|-----------|--------------|-------|
|                | Coefficient                                | HR        | 95%CI       | P      | Coefficient          | HR        | 95%CI        | P     |
| Age            |                                            |           |             |        |                      |           |              |       |
| 20-39          |                                            | Reference |             |        |                      | Reference |              |       |
| 40-59          | 0.003                                      | 0.970     | 0.321-2.933 | 0.957  | 0.356                | 1.531     | 0.378-6.205  | 0.551 |
| 60-79          | 0.071                                      | 0.862     | 0.289-2.574 | 0.791  | 1.206                | 2.181     | 0.524-8.773  | 0.272 |
| ≥80            | 0.003                                      | 0.968     | 0.321-2.922 | 0.954  | 3.302                | 3.646     | 0.903-14.718 | 0.069 |
| Sex            |                                            |           |             |        |                      |           |              |       |
| Male           |                                            | Reference |             |        |                      | Reference |              |       |
| Female         | 8.612                                      | 1.308     | 1.093-1.564 | 0.003  | 1.108                | 0.935     | 0.825-1.060  | 0.293 |
| Race           |                                            |           |             |        |                      |           |              |       |
| White          |                                            | Reference |             |        |                      | Reference |              |       |
| Black          | 0.502                                      | 1.147     | 0.785-1.675 | 0.479  | 2.535                | 1.243     | 0.951-1.625  | 0.111 |
| Other          | 15.138                                     | 1.670     | 1.290-2.162 | <0.001 | 0.007                | 0.991     | 0.809-1.214  | 0.932 |
| Marital status |                                            |           |             |        |                      |           |              |       |
| Married        |                                            | Reference |             |        |                      | Reference |              |       |
| Single         | 0.828                                      | 1.147     | 0.853-1.543 | 0.363  | 0.802                | 1.101     | 0.892-1.359  | 0.370 |
| Others         | 0.203                                      | 0.902     | 0.576-1.412 | 0.652  | 0.066                | 0.960     | 0.702-1.313  | 0.797 |
| Site           |                                            |           |             |        |                      |           |              |       |
| Renal pelvis   |                                            | Reference |             |        |                      | Reference |              |       |
| Ureter         | 2.831                                      | 0.837     | 0.680-1.030 | 0.092  | 0.172                | 0.971     | 0.846-1.115  | 0.678 |
| Grade          |                                            |           |             |        |                      |           |              |       |
| Well           |                                            | Reference |             |        |                      | Reference |              |       |
| Moderate       | 0.005                                      | 1.033     | 0.416-2.566 | 0.944  | 0.770                | 0.798     | 0.482-1.321  | 0.380 |

|  |                    |        |           |             |        |         |           |             |        |
|--|--------------------|--------|-----------|-------------|--------|---------|-----------|-------------|--------|
|  | Poor               | 2.172  | 1.848     | 0.817-4.181 | 0.141  | 3.700   | 1.546     | 0.992-2.409 | 0.054  |
|  | Undifferential     | 2.535  | 1.929     | 0.859-4.330 | 0.111  | 3.630   | 1.534     | 0.988-2.383 | 0.057  |
|  | Size               |        |           |             |        |         |           |             |        |
|  | <2                 |        | Reference |             |        |         | Reference |             |        |
|  | 2-4                | 7.735  | 1.656     | 1.161-2.363 | 0.005  | 1.161   | 1.127     | 0.907-1.400 | 0.281  |
|  | ≥4                 | 16.867 | 2.065     | 1.461-2.918 | <0.001 | 17.071  | 1.548     | 1.258-1.905 | <0.001 |
|  | Laterality         |        |           |             |        |         |           |             |        |
|  | Left               |        | Reference |             |        |         | Reference |             |        |
|  | Right              | 0.833  | 1.087     | 0.908-1.301 | 0.362  | 0.098   | 1.020     | 0.903-1.152 | 0.754  |
|  | Surgery            |        |           |             |        |         |           |             |        |
|  | Yes                |        | Reference |             |        |         | Reference |             |        |
|  | NO/Unknown         | 0.415  | 1.310     | 0.576-2.976 | 0.519  | 1.851   | 1.502     | 0.836-2.698 | 0.174  |
|  | Radiotherapy       |        |           |             |        |         |           |             |        |
|  | Yes                |        | Reference |             |        |         | Reference |             |        |
|  | NO/Unknown         | 0.766  | 0.874     | 0.646-1.182 | 0.382  | 2.956   | 0.831     | 0.674-1.026 | 0.086  |
|  | Chemotherapy       |        |           |             |        |         |           |             |        |
|  | Yes                |        | Reference |             |        |         | Reference |             |        |
|  | NO/Unknown         | 0.052  | 0.975     | 0.786-1.210 | 0.820  | 15.710  | 1.348     | 1.163-1.562 | <0.001 |
|  | Distant metastasis |        |           |             |        |         |           |             |        |
|  | No                 |        | Reference |             |        |         | Reference |             |        |
|  | Yes                | 34.221 | 2.233     | 1.706-2.923 | <0.001 | 107.712 | 2.729     | 2.258-3.298 | <0.001 |
|  | LNE                |        |           |             |        |         |           |             |        |
|  | 1-3                |        | Reference |             |        |         | Reference |             |        |
|  | 4-7                | 6.317  | 0.711     | 0.545-0.928 | 0.012  | 0.518   | 0.939     | 0.791-1.115 | 0.472  |
|  | ≥8                 | 7.517  | 0.698     | 0.540-0.903 | 0.006  | 3.203   | 0.856     | 0.722-1.015 | 0.074  |
|  | LNP                |        |           |             |        |         |           |             |        |



1  
2  
3  
4  
5  
6  
7  
8  
9  
10  
11  
12  
13  
14  
15  
16  
17  
18  
19  
20  
21  
22  
23  
24  
25  
26  
27  
28  
29  
30  
31  
32  
33  
34  
35  
36  
37  
38  
39  
40  
41  
42  
43  
44  
45  
46

|     |        |           |             |        |        |           |             |        |
|-----|--------|-----------|-------------|--------|--------|-----------|-------------|--------|
| No  |        | Reference |             |        |        | Reference |             |        |
| Yes | 20.122 | 2.252     | 1.580-3.211 | <0.001 | 48.506 | 2.365     | 1.856-3.013 | <0.001 |
| LNR | 0.033  | 0.963     | 0.638-1.452 | 0.856  | 0.086  | 1.043     | 0.785-1.387 | 0.769  |

For peer review only

## Figure legends

Figure 1. Data selection flowchart.

Figure 2. The CIF curves of UTUC cancer-specific death (CSD). Site, size, surgery, radiotherapy, distant metastasis, and LNE were significantly related to the patients of CSD. LNE: lymph nodes examined.

Figure 3. Nomogram based on the competing risk analysis to predict cancer-specific death probabilities at 3, 5, and 8 years for UTUC patients.

Figure 4. Calibration curves. Calibration curves for 3, 5, and 8 years calibration plots of the training (A, C, E) and validation (B, D, F) cohort.

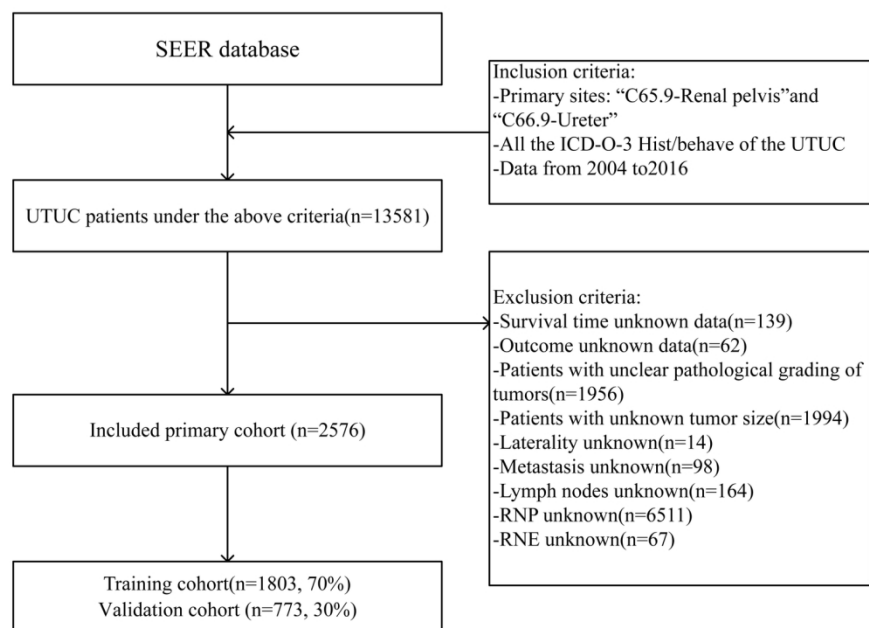

Data selection flowchart.

74x78mm (600 x 600 DPI)

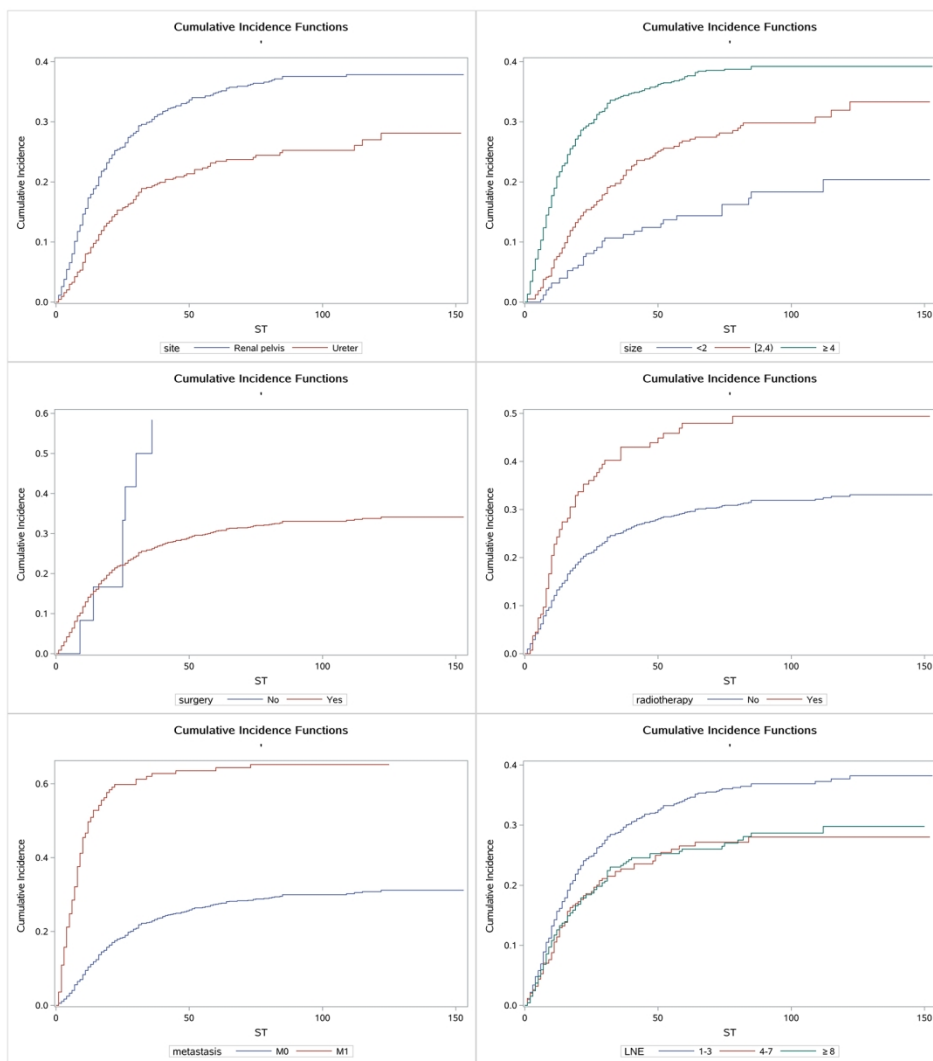

The CIF curves of UTUC cancer-specific death (CSD). Site, size, surgery, radiotherapy, distant metastasis, and LNE were significantly related to the patients of CSD. LNE: lymph nodes examined.

160x178mm (300 x 300 DPI)

1  
2  
3  
4  
5  
6  
7  
8  
9  
10  
11  
12  
13  
14  
15  
16  
17  
18  
19  
20  
21  
22  
23  
24  
25  
26  
27  
28  
29  
30  
31  
32  
33  
34  
35  
36  
37  
38  
39  
40  
41  
42  
43  
44  
45  
46  
47  
48  
49  
50  
51  
52  
53  
54  
55  
56  
57  
58  
59  
60

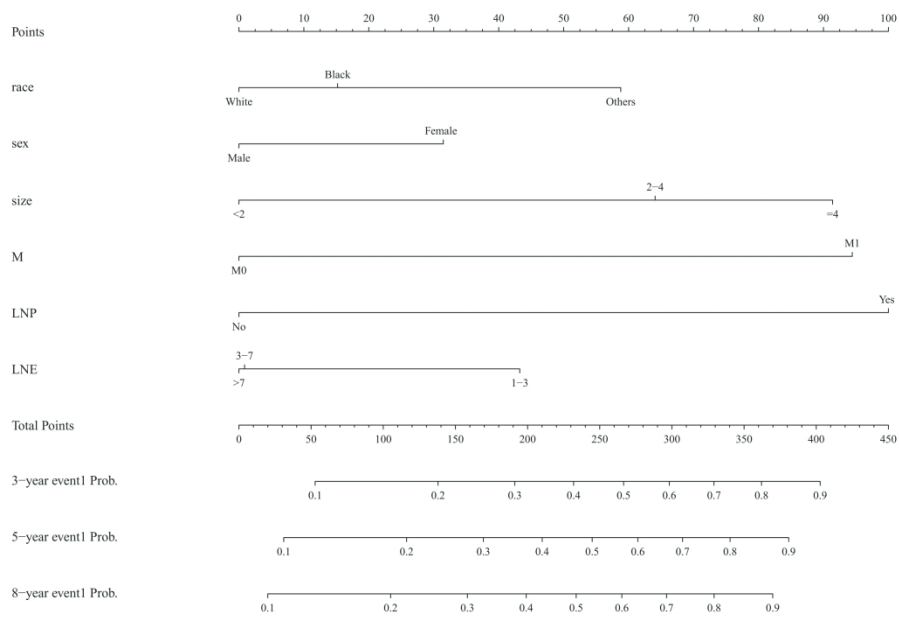

Nomogram based on the competing risk analysis to predict cancer-specific death probabilities at 3, 5, and 8 years for UTUC patients.

149x113mm (600 x 600 DPI)

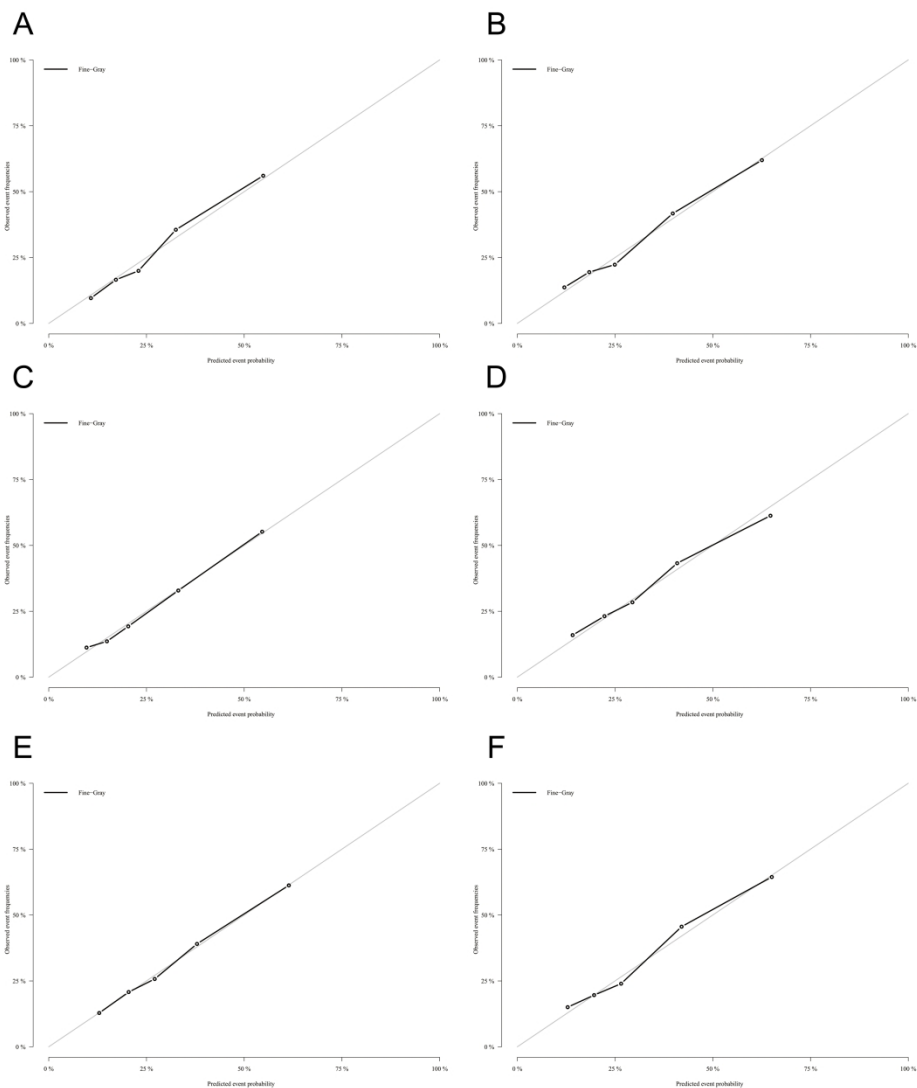

Calibration curves. Calibration curves for 3, 5, and 8 years calibration plots of the training (A, C, E) and validation (B, D, F) cohort.

159x180mm (600 x 600 DPI)

Figure 1

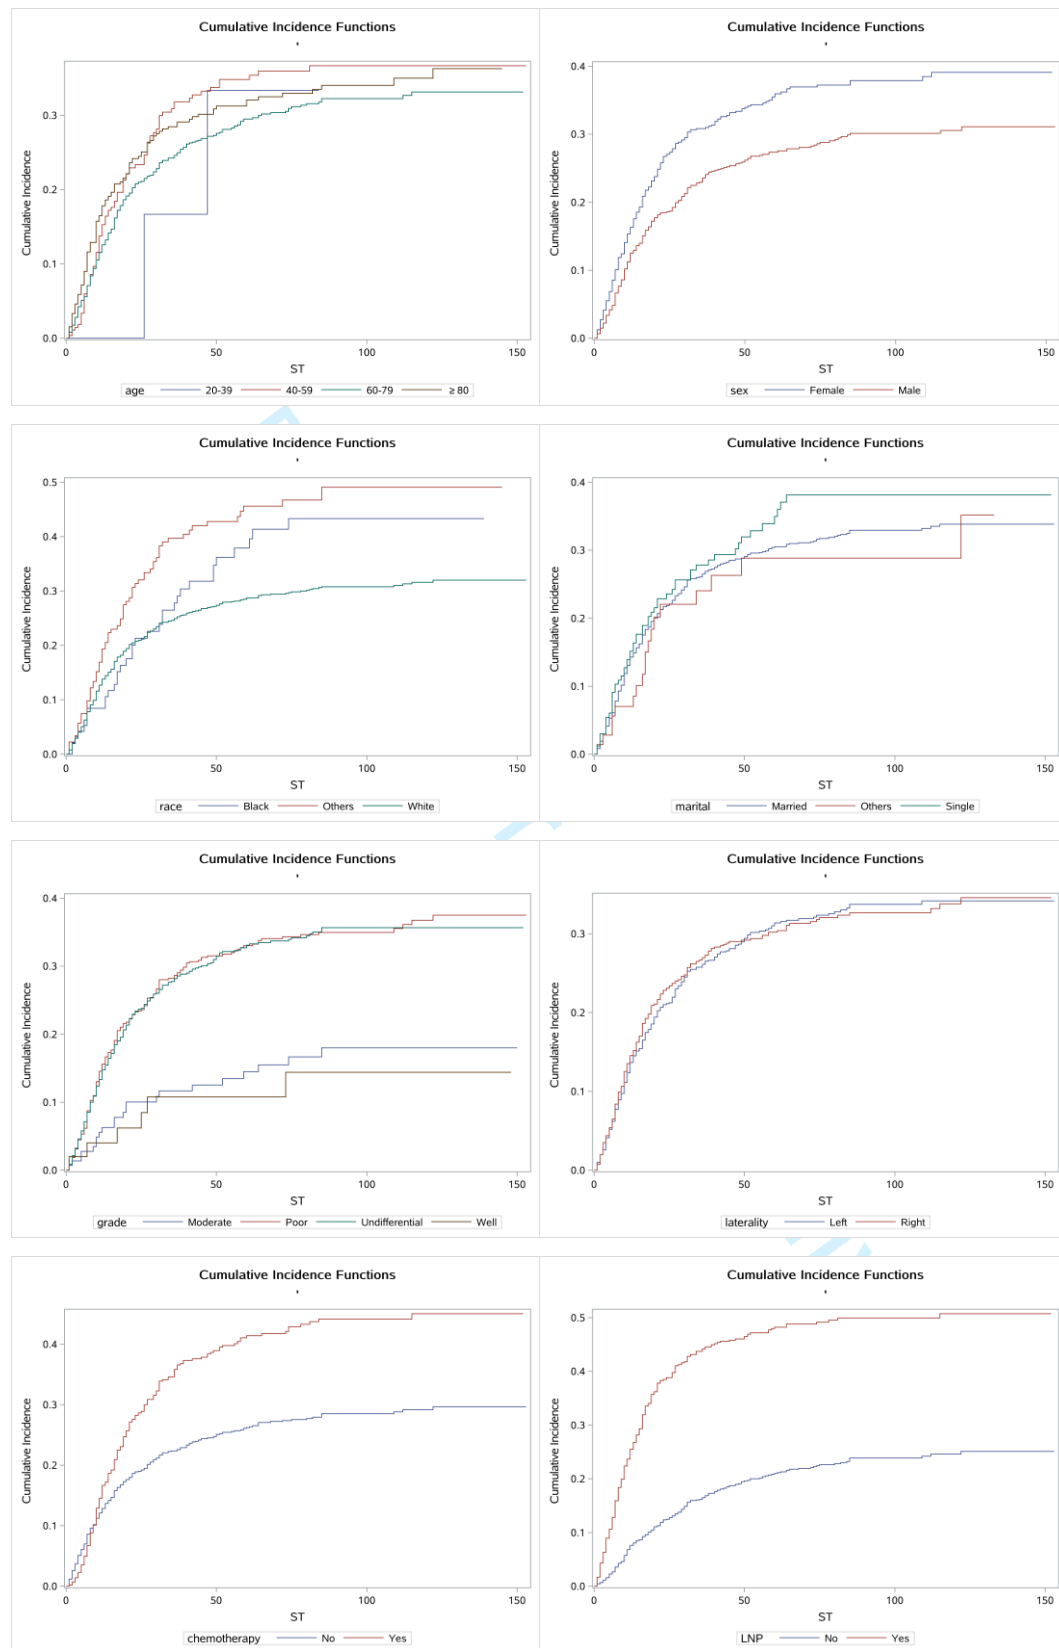

Figure 1. The CIF curves of UTUC cause-specific death. LNP: lymph nodes positive.

Figure 2

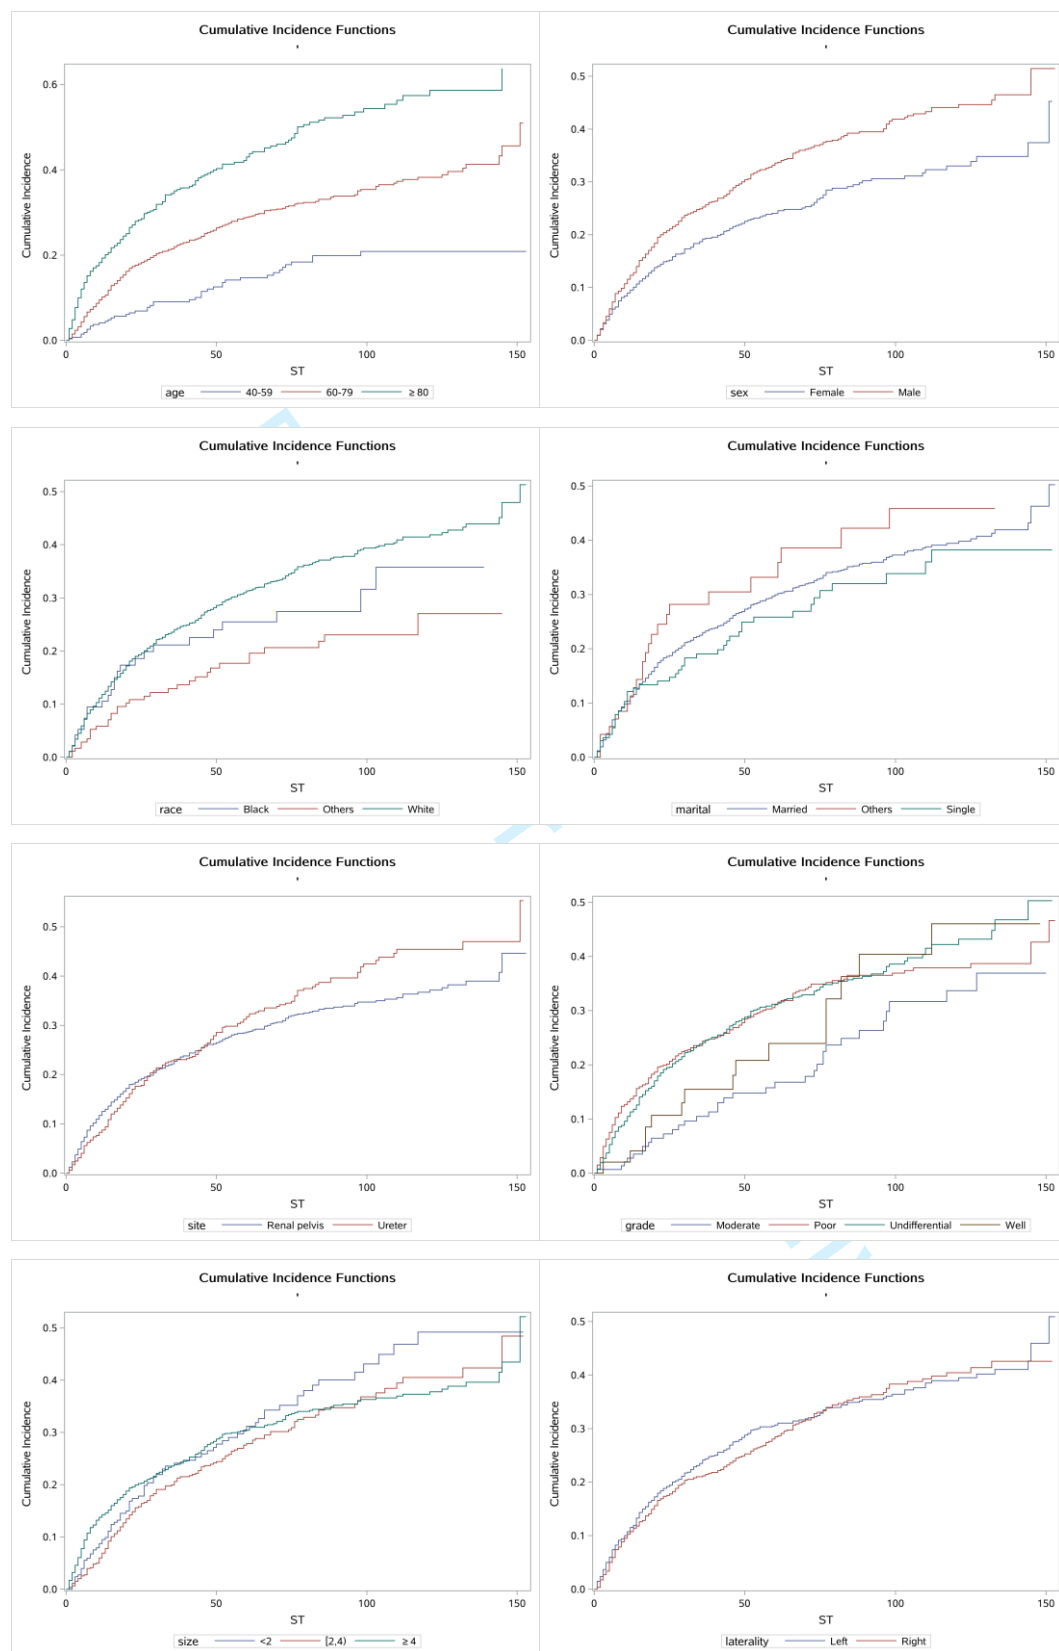



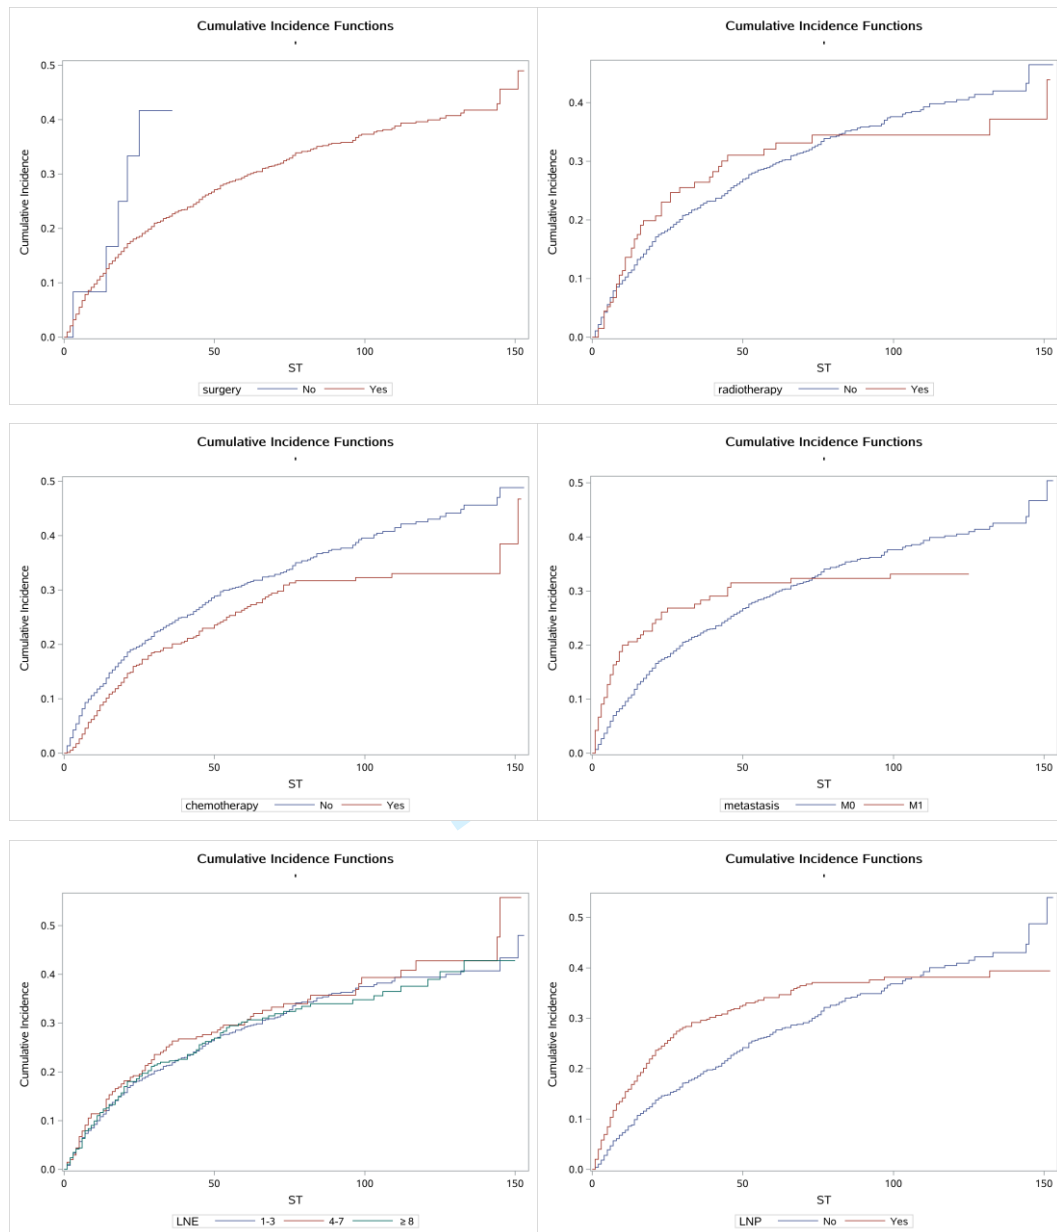

Figure 2. The CIF curves of death due to other causes of UTUC patients. LNE: lymph nodes examined; LNP: lymph nodes positive.

# BMJ Open

## A competing-risks nomogram for predicting cancer-specific death in upper-tract urothelial carcinoma: a population-based analysis

|                                 |                                                                                                                                                                                                                                                                                                                                                                                                                                                                                                                                                                                                                                                                                                                                                                                                                                                                                                                                                                                                                                                                                                                                                                                             |
|---------------------------------|---------------------------------------------------------------------------------------------------------------------------------------------------------------------------------------------------------------------------------------------------------------------------------------------------------------------------------------------------------------------------------------------------------------------------------------------------------------------------------------------------------------------------------------------------------------------------------------------------------------------------------------------------------------------------------------------------------------------------------------------------------------------------------------------------------------------------------------------------------------------------------------------------------------------------------------------------------------------------------------------------------------------------------------------------------------------------------------------------------------------------------------------------------------------------------------------|
| Journal:                        | <i>BMJ Open</i>                                                                                                                                                                                                                                                                                                                                                                                                                                                                                                                                                                                                                                                                                                                                                                                                                                                                                                                                                                                                                                                                                                                                                                             |
| Manuscript ID                   | bmjopen-2020-048243.R1                                                                                                                                                                                                                                                                                                                                                                                                                                                                                                                                                                                                                                                                                                                                                                                                                                                                                                                                                                                                                                                                                                                                                                      |
| Article Type:                   | Original research                                                                                                                                                                                                                                                                                                                                                                                                                                                                                                                                                                                                                                                                                                                                                                                                                                                                                                                                                                                                                                                                                                                                                                           |
| Date Submitted by the Author:   | 12-Mar-2021                                                                                                                                                                                                                                                                                                                                                                                                                                                                                                                                                                                                                                                                                                                                                                                                                                                                                                                                                                                                                                                                                                                                                                                 |
| Complete List of Authors:       | Li, Chengzhuo; Jinan University First Affiliated Hospital, Department of Clinical Research; Xian Jiaotong University, Department of Clinical Research<br>Han, Didi; Jinan University First Affiliated Hospital, Department of Clinical Research; Xi'an Jiaotong University, Department of Clinical Research<br>Huang, Qiao; Wuhan University Zhongnan Hospital Department of Chemotherapy and Radiation Therapy<br>Xu, Fengshuo; Jinan University First Affiliated Hospital, Department of Clinical Research; Xi'an Jiaotong University, Department of Clinical Research<br>Zheng, Shuai; Jinan University First Affiliated Hospital; Shaanxi University of Chinese Medicine<br>Li, Xiang; Xian Jiaotong University<br>Zhao, Fanfan; Jinan University First Affiliated Hospital, Department of Clinical Research; Xi'an Jiaotong University, Department of Clinical Research<br>Feng, Xiaojie; Jinan University First Affiliated Hospital, Department of Clinical Research; Xi'an Jiaotong University, Department of Clinical Research<br>Lyu, Jun; Jinan University First Affiliated Hospital, Department of Clinical Research; Xi'an Jiaotong University, Department of Clinical Research |
| <b>Primary Subject Heading</b>: | Urology                                                                                                                                                                                                                                                                                                                                                                                                                                                                                                                                                                                                                                                                                                                                                                                                                                                                                                                                                                                                                                                                                                                                                                                     |
| Secondary Subject Heading:      | Public health                                                                                                                                                                                                                                                                                                                                                                                                                                                                                                                                                                                                                                                                                                                                                                                                                                                                                                                                                                                                                                                                                                                                                                               |
| Keywords:                       | EPIDEMIOLOGY, UROLOGY, Urological tumours < UROLOGY                                                                                                                                                                                                                                                                                                                                                                                                                                                                                                                                                                                                                                                                                                                                                                                                                                                                                                                                                                                                                                                                                                                                         |
|                                 |                                                                                                                                                                                                                                                                                                                                                                                                                                                                                                                                                                                                                                                                                                                                                                                                                                                                                                                                                                                                                                                                                                                                                                                             |

SCHOLARONE™  
Manuscripts



I, the Submitting Author has the right to grant and does grant on behalf of all authors of the Work (as defined in the below author licence), an exclusive licence and/or a non-exclusive licence for contributions from authors who are: i) UK Crown employees; ii) where BMJ has agreed a CC-BY licence shall apply, and/or iii) in accordance with the terms applicable for US Federal Government officers or employees acting as part of their official duties; on a worldwide, perpetual, irrevocable, royalty-free basis to BMJ Publishing Group Ltd ("BMJ") its licensees and where the relevant Journal is co-owned by BMJ to the co-owners of the Journal, to publish the Work in this journal and any other BMJ products and to exploit all rights, as set out in our [licence](#).

The Submitting Author accepts and understands that any supply made under these terms is made by BMJ to the Submitting Author unless you are acting as an employee on behalf of your employer or a postgraduate student of an affiliated institution which is paying any applicable article publishing charge ("APC") for Open Access articles. Where the Submitting Author wishes to make the Work available on an Open Access basis (and intends to pay the relevant APC), the terms of reuse of such Open Access shall be governed by a Creative Commons licence – details of these licences and which [Creative Commons](#) licence will apply to this Work are set out in our licence referred to above.

Other than as permitted in any relevant BMJ Author's Self Archiving Policies, I confirm this Work has not been accepted for publication elsewhere, is not being considered for publication elsewhere and does not duplicate material already published. I confirm all authors consent to publication of this Work and authorise the granting of this licence.

1  
2  
3  
4 **A competing-risks nomogram for predicting cancer-specific death in**  
5  
6 **upper-tract urothelial carcinoma: a population-based analysis**  
7  
8  
9

10  
11  
12  
13 Running Head: Nomogram for UTUC cancer-specific death  
14

15  
16 Chengzhuo Li<sup>1,2</sup>, Didi Han<sup>1,2</sup>, Qiao Huang<sup>3</sup>, Fengshuo Xu<sup>1,2</sup>, Shuai Zheng<sup>1,4</sup>, Xiang Li<sup>5</sup>, Fanfan  
17  
18 Zhao<sup>1,2</sup>, Xiaojie Feng<sup>1,2</sup>, and Jun Lyu<sup>1,2\*</sup>  
19

20  
21 \*Correspondence: lyujun2020@jnu.edu.cn  
22

23  
24 <sup>1</sup>Department of Clinical Research, The First Affiliated Hospital of Jinan University, Guangdong  
25  
26 Province, 510630, China  
27

28  
29 <sup>2</sup>School of Public Health, Xi'an Jiaotong University Health Science Center, Shaanxi Province,  
30  
31 710061, China  
32

33  
34 <sup>3</sup>Center for Evidence-Based and Translational Medicine, Zhongnan Hospital of Wuhan University,  
35  
36 Hubei Province, 430071, China  
37

38  
39 <sup>4</sup>School of Public Health, Shaanxi University of Chinese Medicine, Xi'an 712046, Shaanxi  
40  
41 Province, China  
42

43  
44 <sup>5</sup>School of Mechanical Engineering, Xian Jiaotong University, Shaanxi Province, 710049, China  
45  
46  
47  
48  
49

50 Correspondence to: Jun Lyu.

51  
52 Department of Clinical Research, The First Affiliated Hospital of Jinan University, 613 west  
53  
54 huangpu avenue, tianhe district, Guangzhou, Guangdong Province, 510630, China.

55  
56 Telephone: +8613922274169; Email: [lyujun2020@jnu.edu.cn](mailto:lyujun2020@jnu.edu.cn).  
57  
58  
59  
60

## Abstract

**Objectives:** The purpose of this study was to use a competing-risks model to establish a nomogram to more accurately analyze the prognostic factors for upper-tract urothelial carcinoma (UTUC) cancer-specific death (CSD).

**Setting:** The program has yielded a database of all cancer patients in 18 defined geographic regions of the United States.

**Participants:** We selected UTUC patients from the latest edition of the Surveillance, Epidemiology, and End Results (SEER) database that covers from 1975 to 2016. After excluding patients with unknown histological grade, tumor size, and lymph node status, we finally selected 2576 patients.

**Primary and secondary outcome measures:** We used the Fine-Gray subdistribution proportional-hazards model for a multivariate analysis and compared the results with those obtained using cause-specific hazards model. We finally constructed a nomogram for the 3, 5, and 8 years CSD rates and tested these rates in a validation cohort.

**Results:** The subdistribution proportional-hazards model showed that sex, tumor size, distant metastasis, surgery status, number of lymph nodes positive (LNP), and lymph nodes ratio(LNR) were independent prognostic factors for CSD. All significant

1  
2  
3  
4 factors associated with CSD were included in the nomogram. The 3, 5, and 8 years  
5  
6 concordance indexes(C-indexes) were 0.714, 0.698, and 0.688 in the training cohort,  
7  
8 respectively, and 0.693, 0.670, and 0.665 in the validation cohort.  
9  
10

11  
12 **Conclusions:** The competing-risks model showed that sex, tumor size, distant  
13  
14 metastasis, surgery status, LNP and LNR were associated with CSD. The nomogram  
15  
16 predicts the probability of CSD in UTUC patients at 3, 5, and 8 years, which can  
17  
18 improve the ability of clinicians to predict the survival probabilities in individual  
19  
20 patients.  
21  
22  
23  
24  
25  
26  
27  
28  
29

### 30 **Strengths and limitations of this study:**

- 31  
32  
33 •The study established the first competing risk nomogram for predicting the 3-, 5-,  
34  
35 and 8-year specific mortality probability for UTUC based on a large retrospective  
36  
37 sample, which can improve the ability of clinicians to predict the survival  
38  
39 probabilities in individual patients.  
40  
41  
42  
43  
44 •The established model is not comprehensive enough, because the SEER database  
45  
46 does not include all prognostic factors for UTUC.  
47  
48  
49  
50  
51 •The data available on the treatment status are not sufficiently detailed to distinguish  
52  
53 the impact of various treatment plans.  
54  
55  
56  
57 •The model requires prospective studies to confirm its reliability.  
58  
59  
60

1  
2  
3  
4  
5  
6  
7 **Keywords:** competing risk model, upper-tract urothelial carcinoma(UTUC),  
8  
9  
10 nomogram, SEER, cancer-specific death  
11

12  
13 **Abbreviations:** UTUC: upper-tract urothelial carcinoma; CSD: cancer-specific death;  
14  
15  
16 DOC: death due to other causes; SEER: Surveillance, Epidemiology, and End  
17  
18 Results; LNE: lymph nodes examined; LNP: lymph nodes positive; K-M:  
19  
20 Kaplan-Meier; CIF: cumulative incidence function; ICD-O-3: International  
21  
22 Classification of Diseases for Oncology-3; LNR: lymph nodes ratio; C-index:  
23  
24 concordance index; CS: cause-specific hazard function; SD: subdistribution  
25  
26 proportional-hazards function  
27  
28  
29  
30  
31  
32  
33  
34  
35

## 36 **Introduction**

37  
38

39 Urothelial carcinomas are the fourth most common type of tumor,[1] and they can  
40  
41 be located in the upper urinary tract or the lower. Upper-tract urothelial carcinoma  
42  
43 (UTUC), which includes renal pelvis and ureter carcinoma, currently accounts for 5%  
44  
45 of urothelial malignancies. [2] The annual incidence of UTUC is typically estimated  
46  
47 at 1 or 2 per 100,000 inhabitants in Western countries.[3] However, the increasing  
48  
49 morbidity and mortality associated with UTUC[4, 5] are increasing the importance of  
50  
51 this research.  
52  
53  
54  
55  
56  
57  
58  
59  
60

1  
2  
3  
4 A study showed that UTUC has unique prognostic factors, which are different  
5  
6 from bladder cancer and other urinary tract cancers.[6] Most studies analyzing the  
7  
8 prognostic factors for UTUC have adopted the Kaplan-Meier (K-M) method or Cox  
9  
10 regression methods.[7–9] These methods consider only a single end point when  
11  
12 determining survival parameters. However, in addition to interest event, there are  
13  
14 often competing events in clinical research. Competing events for cancer deaths refer  
15  
16 to death from other causes not related to the primary cancer, such as other diseases,  
17  
18 car collisions, and suicide. In traditional survival analysis, these events would be  
19  
20 considered as censored, which would cause the cumulative incidence rate of cancer  
21  
22 deaths to be overestimated. Applying standard survival analysis to competing-risks  
23  
24 data leads to false and biased results.[10] While all-cause death as the study endpoint  
25  
26 does not lead to competing risks bias, such an analysis could not reflect the influence  
27  
28 of factors on the specific endpoint of cancer deaths. Therefore, the cumulative  
29  
30 incidence function (CIF) of UTUC cancer-specific death (CSD) needs to be calculated  
31  
32 and prognostic factors for UTUC analyzed using the Fine-Gray subdistribution  
33  
34 proportional-hazards model.[11]

35  
36  
37  
38  
39  
40  
41  
42  
43  
44  
45  
46 The purpose of our research was to identify the prognostic factors of UTUC  
47  
48 based on competing risks model and used them to construct a nomogram to predict  
49  
50 the survival rates of patients at the 3, 5, and 8 years. A nomogram is based on a  
51  
52 prognostic model and graphically presents the predictive abilities of different  
53  
54 prognostic factors as the lengths of line segments. This format makes it easy for  
55  
56  
57  
58  
59  
60



1  
2  
3  
4 clinicians to make rapid and comprehensive judgments and to predict the  
5  
6 probability of CSD, which has great clinical significance. Some studies have  
7  
8 constructed competing-risks nomograms for cancers such as sarcoma and prostate  
9  
10 cancer,[12, 13] but research related to UTUC has been lacking.  
11  
12  
13  
14

15 The current study was conducted to assess the effect of several factors in UTUC  
16  
17 using a competing-risks method, and to construct a comprehensive nomogram that  
18  
19 presents the impacts of these prognostic factors in order to guide clinical work.  
20  
21  
22

## 23 **Methods**

### 24 **Database and patients**

25  
26  
27 The Surveillance, Epidemiology, and End Results (SEER) program has yielded a  
28  
29 database of all cancer patients in 18 defined geographic regions of the United States  
30  
31 collected by the National Cancer Institute. It is the largest cancer registry in the  
32  
33 United States and includes information on approximately 28% of the United States  
34  
35 population. Because part of the SEER research data is publicly available, no informed  
36  
37 consent or institutional review board approval is required when analyzing the data.  
38  
39 We additionally requested chemotherapy data for inclusion in our research and  
40  
41 obtained a license for using SEER software.[14, 15]  
42  
43  
44  
45  
46  
47  
48  
49  
50  
51

52 We selected UTUC patients from the latest edition of the SEER database that  
53  
54 covers from 1975 to 2016. The primary sites were extracted using the SEER codes of  
55  
56 “C65.9-Renal pelvis” and “C66.9-Ureter.” Patients between 2004 and 2015 were  
57  
58  
59  
60

1  
2  
3  
4 included in the study. We included all of the histological subtypes of UTUC,  
5  
6 according to the ICD-O-3 (third revision of the International Classification of  
7  
8 Diseases for Oncology). The following demographic indicators were selected: age at  
9  
10 diagnosis, sex, race, and marital status. Primary site, histological grade, tumor size,  
11  
12 laterality, distant metastasis, surgery status, radiotherapy status, chemotherapy status,  
13  
14 number of lymph nodes examined (LNE), lymph nodes positive (LNP), and lymph  
15  
16 nodes ratio (LNR; calculated as the number of LNP divided by LNE) were also  
17  
18 included as pathological characteristics. The tumor size was categorized into three  
19  
20 groups:  $<2$ ,  $2-4$ , and  $\geq 4$  cm.[1, 16] The study outcomes included CSD and death due  
21  
22 to other causes (DOC). The survival time was reported in the available data in  
23  
24 months.  
25  
26  
27  
28  
29  
30  
31  
32

### 33 **Exclusion criteria**

34  
35  
36  
37 Our preliminary selection of the above methods initially identified 13,581  
38  
39 patients. Then, in order to ensure the accuracy of the study, the exclusion criteria for  
40  
41 the study data are as follows: unknown histological grade, unknown tumor size, and  
42  
43 unknown lymph nodes status. The specific data selection process is shown in  
44  
45 Figure 1. We finally chose 2576 patients for inclusion in follow-up investigations.  
46  
47  
48  
49

50 Figure 1

### 51 **Statistical methods**

52  
53  
54  
55  
56  
57 We randomly divided the 2576 eligible patients into 2 groups using R software  
58  
59  
60

1  
2  
3  
4 (version 3.5.3, The R Foundation for Statistical Computing, Vienna, Austria;  
5  
6 <http://www.r-project.org>): 70% (n=1803) in the training cohort and 30% (n=773) in  
7  
8 the validation cohort. We first described the basic composition of each factor in the  
9  
10 two patient cohorts using R software. The age, LNE, LNP and LNR were expressed  
11  
12 as median and interquartile-range values, while categorical variables were represented  
13  
14 as percentages. We evaluated differences in patient characteristics between two  
15  
16 groups using the Student's t-test and Chi-square test.  
17  
18  
19  
20  
21  
22

23 We used the cumulative incidence function (CIF) to describe the probability of  
24  
25 each event, and also plotted the corresponding CIF curves. And then we do univariate  
26  
27 analysis by using Gray's test to estimate the difference in the CIF between groups.  
28  
29 The significant variables ( $P < 0.05$ ) were put into multivariable regression model. The  
30  
31 Fine-Gray subdistribution proportional-hazards model was used for the multivariate  
32  
33 analysis and compared the results with using cancer-specific hazards model. Applying  
34  
35 the standard Cox regression method ignores the presence of competing risks and  
36  
37 hence overestimates the actual incidence of beneficial events, and so may lead to  
38  
39 inappropriate risk stratification.[17] Several studies have confirmed that different  
40  
41 approaches can be used in competing-risks settings for multivariate survival analysis,  
42  
43 but subdistribution proportional-hazards model have been found to be the best  
44  
45 predictors of survival probability.[18-20]  
46  
47  
48  
49  
50  
51  
52  
53  
54

55 Finally, the results of Fine-Gray subdistribution proportional-hazards model were  
56  
57 used to construct a nomogram of the 3, 5, and 8 years CSD rates, which was tested  
58  
59  
60

1  
2  
3  
4 using the validation cohort. We used the concordance index (C-index) and calibration  
5  
6 plots to evaluate the differentiation ability and consistency of the established model.  
7  
8  
9

10 All statistical tests were conducted using R software (version 3.5.3). Probability  
11  
12 values of  $P < 0.05$  were considered statistically significant, and all tests were  
13  
14 two-sided. The SEER database can be accessed free of charge, and this study was  
15  
16 exempted from obtaining informed consent.  
17  
18  
19

## 20 21 **Patients and public involvement**

22  
23  
24 This research was done without patient involvement. Patients were not invited to  
25  
26 comment on the study design and were not consulted to develop patient-relevant  
27  
28 outcomes or interpret the results. Patients were not invited to contribute to the writing  
29  
30 or editing of this document for readability or accuracy.  
31  
32  
33  
34  
35  
36  
37  
38

## 39 **Results**

### 40 41 42 **Patient characteristics**

43  
44  
45  
46 The composition of each variable for the 2576 patients in the training and  
47  
48 validation cohorts is presented in Table 1. This table indicates that the median age  
49  
50 was 71 years in the training and validation cohorts, respectively. The majority of  
51  
52 patients were male (60.6% and 57.4%), white (86.2% and 82.5%), and married  
53  
54 (86.8% and 87.6%). The main UTUC sites were in the renal pelvis (63.9% and 62.7%,  
55  
56  
57  
58  
59  
60

1  
2  
3  
4 respectively, in the training and validation cohorts), with the rest in the ureter.  
5  
6 Majority of patients were in the undifferentiated stage (58.1% and 55.6%), and most  
7  
8 of the tumors in both cohorts were larger than 4 cm. Most patients in both cohorts had  
9  
10 received surgery, whereas a few patients had received radiotherapy or chemotherapy.  
11  
12 Only about 9% of patients had distant metastasis. Baseline characteristics were  
13  
14 basically similar in the training and validation cohorts.  
15  
16  
17  
18  
19

20  
21 

|         |
|---------|
| Table 1 |
|---------|

  
22

### 23 **Univariate analysis**

24  
25 We calculated the 3, 5, and 8 years cumulative incidence rates of CSD and DOC.  
26  
27 Year, laterality, and marital status were not related to either outcome ( $P > 0.05$ ), while  
28  
29 age, sex, histological grade, chemotherapy status, and LNR were related to both  
30  
31 outcomes ( $P < 0.05$ ). Race, primary site, tumor size, surgery status, radiotherapy status,  
32  
33 distant metastasis, LNE, and LNP were significantly related to CSD. The  
34  
35 corresponding CIF curves are shown in Figure 2. The cumulative incidence rates of  
36  
37 CSD and DOC are compared in Table 2.  
38  
39  
40  
41  
42  
43  
44  
45  
46  
47  
48  
49  
50  
51  
52

46 

|                   |
|-------------------|
| Figure 2, Table 2 |
|-------------------|

  
47  
48  
49  
50  
51  
52

### 53 **Multivariate analysis**

54  
55 Our comparison of the proportional subdistribution hazards model with  
56  
57  
58  
59  
60

1  
2  
3  
4 cancer-specific hazards model yielded the results presented in Table 3. The  
5  
6 cancer-specific hazards model showed that sex, tumor size, distant metastasis, LNP  
7  
8 and LNR were prognostic factors for UTUC ( $P < 0.001$ ). We then constructed the  
9  
10 Fine-Gray subdistribution proportional-hazards model, which indicated that sex  
11  
12 (hazard ratio [HR]=1.481 for female, 95% confidence interval [CI]=1.243–1.766),  
13  
14 tumor size (HR=1.563 for 2–4 cm, 95% CI=1.098–2.226; HR=2.204 for  $\geq 4$  cm, 95%  
15  
16 CI=1.575–3.086), surgery status (HR=2.915 for no/unknown surgery,  
17  
18 95% CI=1.289–3.738), distant metastasis (HR=2.419 for distant, 95%  
19  
20 CI=1.847–3.169), LNP (HR=1.064, 95% CI=1.022–1.107), and LNR (HR=1.871, 95%  
21  
22 CI=1.434–2.442) were prognostic factors affecting UTUC, as presented in Table 3.  
23  
24  
25  
26  
27  
28  
29  
30

31 **Table 3**

### 32 33 34 35 36 37 **Construction and verification of the nomogram**

38  
39  
40  
41 Figure 3 shows the nomogram we constructed according to the results of the  
42  
43 Fine-Gray subdistribution proportional-hazards model for predicting the CSD  
44  
45 probabilities at 3, 5, and 8 years. The figure shows that LNP had the greatest impact  
46  
47 on the probability of CSD, followed by distant metastasis, tumor size, LNR, surgery,  
48  
49 and sex.  
50  
51  
52  
53

54  
55 We used the validation cohort to verify the nomogram after establishing it. The 3,  
56  
57 5, and 8 years C-indexes were 0.714, 0.698, and 0.688 for the training cohort,  
58  
59  
60

1  
2  
3  
4 respectively, and 0.693, 0.670, and 0.665 for the validation cohort. All of these values  
5  
6 exceeded 0.6, which indicated that the model had good discrimination ability. We  
7  
8 then tested the prediction accuracy of the model. As shown in Figure 4, the 3, 5, and 8  
9  
10 years calibration plots for both cohorts were very close to the standard straight line,  
11  
12  
13 demonstrating that the model was well calibrated.  
14  
15  
16

17  
18  Figures 3, 4  
19  
20  
21  
22  
23

## 24 **Discussion**

25  
26  
27  
28 The increasing incidence of UTUC[21] makes it necessary to further explore the  
29  
30 prognostic factors for UTUC. The present study used a competing-risks model to  
31  
32 more accurately explore the prognostic factors for UTUC, and used these factors to  
33  
34 construct a nomogram to provide clinicians with direct guidance when they are  
35  
36 making relevant predictions.  
37  
38  
39

40  
41  
42 The application of study criteria resulted in the inclusion in 2576 patients from  
43  
44 the SEER database, and 1542 of these patients died during the follow-up, although  
45  
46 only 750 of the deaths were related to UTUC. This means that the number of DOC  
47  
48 patients was almost the same as that for CSD. In this situation, if the traditional K-M  
49  
50 or Cox survival analysis had been adopted, the DOC patients will be considered as  
51  
52 censored. This would lead to the overestimation of the cumulative incidence rate of  
53  
54 CSD and hence not truly reflect the prognosis.[22, 23] We overcame this shortcoming  
55  
56  
57  
58  
59  
60

1  
2  
3  
4 by using competing risks model, which can properly address the situation where the  
5  
6 available data are related to multiple potential outcomes.[24] This method was first  
7  
8  
9 proposed by Fine and Gray, and has also been applied in some previous  
10  
11 studies.[17,25–26] In the presence of competing risks, there are usually two models,  
12  
13 one is cause-specific hazards function (CS), the other is subdistribution  
14  
15 proportional-hazards function (SD), and the latter is also called Fine-Gray model. We  
16  
17 analyzed and compared the two models in this study. Because CS is suitable for  
18  
19 answering etiological questions, and SD is suitable for establishing clinical prediction  
20  
21 models and risk scores. Therefore, we used the CIF and the subdistribution  
22  
23 proportional-hazards model to explore the impact of various factors on the prognosis  
24  
25 of CSD.  
26  
27  
28  
29  
30  
31

32  
33 The univariate analysis results showed that age, sex, race, primary site,  
34  
35 histological grade, tumor size, surgery status, radiotherapy status, chemotherapy  
36  
37 status, distant metastasis, LNE, LNP, and LNR were influencing factors for CSD,  
38  
39 while age, sex, histological grade, chemotherapy status, and LNR were influencing  
40  
41 factors for DOC. The cause-specific hazards model results showed that age, sex,  
42  
43 histological grade, tumor size, distant metastasis, LNP, and LNR were prognostic  
44  
45 factors for CSD. The subdistribution proportional-hazards model showed that sex,  
46  
47 tumor size, surgery, distant metastasis, LNP, and LNR are independent prognostic  
48  
49 factors for CSD.  
50  
51  
52  
53  
54 factors for CSD.  
55  
56

57 Age is a prognostic factor for most cancers, and so is for UTUC.[27, 28] Our CS  
58  
59  
60



1  
2  
3  
4 model showed that age was a predictor of CSD, however, it is not statistically  
5  
6 significant in the SD model. This may be because of the effect of age on DOC higher  
7  
8 than the CSD, namely elderly patients are more likely to death of other causes, which  
9  
10 competitively leads to the fact that the incidence of CSD does not increase  
11  
12 significantly with age. Previous studies may have ignored competing events, and sex  
13  
14 and race have always been controversial prognostic factors. One study showed that  
15  
16 age and race are preoperative prognostic factors for UTUC patients.[29] In contrast,  
17  
18 another study found no statistically significant differences in survival between males  
19  
20 and females.[30] The competing-risks model in our study showed that sex was a risk  
21  
22 factor for UTUC. However, since most of the patients included in the SEER database  
23  
24 are white, the results regarding race need to be further validated.  
25  
26  
27  
28  
29  
30  
31  
32

33 Tumor size has always been a prognostic factor. One study found 5-year  
34  
35 recurrence-free survival rates for patients with tumor sizes  $<3$  cm and  $\geq 3$  cm of 46.9%  
36  
37 and 25.8%, respectively.[31] The univariate and multivariate analyses performed in  
38  
39 the present study indicated that tumor size was an influencing factor for CSD, with  
40  
41 the prognosis being worse for tumors larger than 2 cm. In terms of treatment methods,  
42  
43 surgery status was a significant prognostic factor, which was consistent with the  
44  
45 findings of Yuval et al.[32] Thus, it should be noted that the gold standard treatment  
46  
47 for UTUC is still surgery. However, radiotherapy status, and chemotherapy status  
48  
49 were not influencing factors for CSD in both competing risks models. This conflicts  
50  
51 with some previous findings,[33–35] suggesting that traditional Cox regression  
52  
53  
54  
55  
56  
57  
58  
59  
60

1  
2  
3  
4 analysis overestimates the effects of radiotherapy, and chemotherapy. Of course, the  
5  
6 relative lack of information on the radiotherapy status and chemotherapy status in the  
7  
8 SEER database may also lead to inaccurate results, and so further exploration of these  
9  
10 indicators is needed.  
11  
12  
13

14  
15 Some indicators related to lymph nodes (e.g., distant lymph node metastasis,  
16  
17 LNP, and LNE) have been found to be important clinical information for the  
18  
19 prognosis of cancer, but whether they are independent prognostic factors for UTUC  
20  
21 has not been determined. One study found that lymph node metastases were  
22  
23 significantly associated with reduced disease-specific survival in univariate  
24  
25 analysis.[36] Our research also found that distant metastasis is an important  
26  
27 prognostic factor for CSD, in both the univariate and multivariate analyses.  
28  
29  
30  
31  
32  
33

34 It is worth noting that very few studies have investigated LNP, LNE, and LNR.  
35  
36 Our study is the first to use the SEER database to analyze the prognostic impact of  
37  
38 these indicators on UTUC, and the results may be more accurate than those of studies  
39  
40 involving small samples. LNR is an emerging indicator that has been regarded as a  
41  
42 prognostic factor in rectal cancer and breast cancer.[37, 38] Our results suggested that  
43  
44 LNR was also an important prognostic indicators for UTUC. We found that LNE was  
45  
46 an influencing factor for UTUC in the univariate analysis but not in the multivariate  
47  
48 analysis. Moreover, both LNR and LNP entered the subdistribution proportional  
49  
50 hazards model, which showed that after adjusting for the effects of LNR and LNP,  
51  
52 LNE was no longer an independent prognostic indicator. LNP was a prognostic factor  
53  
54  
55  
56  
57  
58  
59  
60

1  
2  
3  
4 in all of the analyses, indicating that it greatly influences the prognosis of UTUC.  
5  
6

7 We utilized the results from the above-mentioned subdistribution  
8 proportional-hazards model to construct a nomogram that graphically presents the  
9 degrees of influence of various prognostic factors. This nomogram also integrates  
10 various indicators to predict the 3, 5, and 8 years probabilities of CSD. The predictive  
11 function of nomogram has been used for different types of cancer, and has even been  
12 proposed as a new standard. For example, in order to calculate the death probability of  
13 a specific cause of death of a UTUC patient, find the patient's sex (Male or Female)  
14 on the sex row, draw a vertical line on the dot row, and get the sex score value.  
15 Repeat the above steps for tumor size, M stage, surgery, LNP and LNR. Add the point  
16 values of each variable, find the total point on the total point axis, and draw a straight  
17 downward line to get the probability of death of a UTUC patient due to a specific  
18 cause. For example, a female (30 points), with a tumor size of 1.5cm (0 points), M1  
19 (68 points), surgery status is yes (0 points) LNP equal to 5 (15 points), and LNR equal  
20 to 0.8 (45 points), the total score is 158 points, which correspond to 3, 5, and 8 years  
21 of specific cause of death probability of 58%, 64% and 69%, respectively.  
22  
23  
24  
25  
26  
27  
28  
29  
30  
31  
32  
33  
34  
35  
36  
37  
38  
39  
40  
41  
42  
43  
44  
45  
46

47 The C-indexes for the nomogram all exceeded 0.6, demonstrating that the model  
48 provides a good fit to the available data. The prediction calibration curves in Figure 4  
49 are very close to the standard curve, which indicates that the nomogram has good  
50 predictive ability. The results for the validation cohort also show that the model is  
51 stable. This model can therefore help clinicians to quickly and easily determine the  
52  
53  
54  
55  
56  
57  
58  
59  
60

1  
2  
3  
4 prognosis of individual patients and provide guidance in their clinical  
5  
6 decision-making. However, the stability of the model needs further verification.  
7  
8  
9

10 Inevitably, our research had some limitations. First, the established model is not  
11  
12 comprehensive enough, because the SEER database does not include all prognostic  
13  
14 factors for UTUC. Second, the data available on the treatment status are not  
15  
16 sufficiently detailed to distinguish the impact of various treatment plans. Finally, the  
17  
18 model requires prospective studies to confirm its reliability.  
19  
20  
21  
22

## 23 **5. Conclusions**

24  
25  
26  
27 In summary, this study used a competing-risks model to determine the prognostic  
28  
29 factors for UTUC. The subdistribution proportional-hazards model showed that sex, ,  
30  
31 tumor size, surgery, distant metastasis, LNP, and LNR were associated with CSD,  
32  
33 while LNE was not. The constructed nomogram can predict the 3, 5, and 8 years CSD  
34  
35 probabilities of patients based on these relevant factors, which can support clinicians  
36  
37 to make better judgments of the survival rates of individual patients.  
38  
39  
40  
41  
42  
43  
44  
45  
46

## 47 **Footnotes**

48  
49  
50 **Contributorship statement:** JL, CZL, and SZ designed the study; QH, DDH, and  
51  
52  
53 FSX collected and analyzed the data; CZL and XL drafted the initial manuscript;  
54  
55  
56 FFZ, and XJF reviewed and edited the article; All authors read and approved the  
57  
58  
59  
60

1  
2  
3  
4 final manuscript.  
5  
6

7 **Funding:** The study was supported by The National Social Science Foundation of  
8  
9  
10 China (grant no. 16BGL183).  
11  
12

13 **Competing interests:** The authors declare that they have no competing interests.  
14  
15

16 **Availability of data and materials:** Ethical approval was waived, and informed  
17  
18 consent was unnecessary because the SEER research data are anonymous and  
19  
20 publicly available.  
21  
22  
23

24  
25 **Patient consent for publication:** Not required.  
26  
27

28  
29 **Data availability statement:** The datasets generated and analyzed during the current  
30  
31 study are available from the corresponding author on reasonable request.  
32  
33

34  
35 **Ethics approval:** The data analyses and use of the SEER database in our manuscript  
36  
37 are in accordance with the DUA and do not require institutional review board  
38  
39 approval or other ethics approval or consent of the study subjects.  
40  
41  
42

43 **Licence statement:** Other than as permitted in any relevant BMJ Author's Self  
44  
45 Archiving Policies, I confirm this Work has not been accepted for publication  
46  
47 elsewhere, is not being considered for publication elsewhere and does not duplicate  
48  
49 material already published. I confirm all authors consent to publication of this Work  
50  
51 and authorise the granting of this licence.  
52  
53  
54  
55  
56  
57  
58  
59  
60

## References

1. Roupret M, Babjuk M, Comperat E, Zigeuner R, Sylvester RJ, Burger M, Cowan NC, Gontero P, Van Rhijn BWG, Mostafid AH et al. European association of urology guidelines on upper urinary tract urothelial carcinoma: 2017 update. *Eur Urol.* 2018;73(1):111-22.
2. JJ M, LM E. - upper tract urothelial neoplasms: Incidence and survival during the last 2. D - 0376374. (- 0022-5347 (Print)):- 1523-5.
3. Rouprêt M, Babjuk M, Compérat E, Zigeuner R, Sylvester RJ, Burger M, Cowan NC, Böhle A, Van Rhijn BWG, Kaasinen E et al. European association of urology guidelines on upper urinary tract urothelial cell carcinoma: 2015 update. *European Urology.* 2015;68(5):868-79.
4. Siegel RL, Miller KD, Jemal A. Cancer statistics, 2019. *CA Cancer J Clin.* 2019;69(1):7-34.
5. Raman JD, Messer J, Sielatycki JA, Hollenbeak CS. Incidence and survival of patients with carcinoma of the ureter and renal pelvis in the USA, 1973-2005. *BJU Int.* 2011;107(7):1059-64.
6. Green DA, Rink M, Xylinas E, Matin SF, Stenzl A, Roupret M, Karakiewicz PI, Scherr DS, Shariat SF. Urothelial carcinoma of the bladder and the upper tract: Disparate twins. *Journal of Urology.* 2013;189(4):1214-21.

- 1  
2  
3  
4 7. Lughezzani G, Jeldres C, Isbarn H, Shariat SF, Sun M, Pharand D, Widmer H, Arjane P,  
5  
6 Graefen M, Montorsi F et al. A critical appraisal of the value of lymph node dissection at  
7  
8 nephroureterectomy for upper tract urothelial carcinoma. *Urology*. 2010;75(1):118-24.  
9  
10
- 11  
12 8. Novara G, Matsumoto K, Kassouf W, Walton TJ, Fritsche HM, Bastian PJ,  
13  
14 Martinez-Salamanca JI, Seitz C, Lemberger RJ, Burger M et al. Prognostic role of  
15  
16 lymphovascular invasion in patients with urothelial carcinoma of the upper urinary tract:  
17  
18 An international validation study. *Eur Urol*. 2010;57(6):1064-71.  
19  
20
- 21  
22 9. Remzi M, Haitel A, Margulis V, Karakiewicz P, Montorsi F, Kikuchi E, Zigeuner R,  
23  
24 Weizer A, Bolenz C, Bensalah K et al. Tumour architecture is an independent predictor of  
25  
26 outcomes after nephroureterectomy: A multi-institutional analysis of 1363 patients. *BJU*  
27  
28 *Int*. 2009;103(3):307-11.  
29  
30
- 31  
32 10. Kim HT. Cumulative incidence in competing risks data and competing risks regression  
33  
34 analysis. *Clin Cancer Res*. 2007;13(2 Pt 1):559-65.  
35  
36
- 37  
38 11. PC A, JP F. - practical recommendations for reporting fine-gray model analyses for  
39  
40 competing. *D - 8215016. (- 1097-0258 (Electronic)):- 4391-400*.  
41  
42
- 43  
44 12. Kattan MW, Heller G, Brennan MF. A competing-risks nomogram for sarcoma-specific  
45  
46 death following local recurrence. *Stat Med*. 2003;22(22):3515-25.  
47  
48
- 49  
50 13. Abdollah F, Sun M, Schmitges J, Tian Z, Jeldres C, Briganti A, Shariat SF, Perrotte P,  
51  
52 Montorsi F, Karakiewicz PI. Cancer-specific and other-cause mortality after radical  
53  
54 prostatectomy versus observation in patients with prostate cancer: Competing-risks  
55  
56  
57  
58  
59  
60

- 1  
2  
3  
4 analysis of a large north american population-based cohort. *Eur Urol.* 2011;60(5):920-30.  
5  
6  
7  
8 14. Surveillance Research Program, National Cancer Institute SEER\*Stat software  
9  
10 (seer.cancer.gov/seerstat) version <SEER\*Stat 8.3.6>.  
11  
12  
13  
14 15. Yang J, Liu QQ, Geng H, Tian GX, Zeng XT, Lyu J. SEER database application and data  
15  
16 extraction methods and processes. *Chinese Journal of Evidence-Based Cardiovascular*  
17  
18 *Medicine*, 2018,10(07):781-784.  
19  
20  
21  
22 16. Pieras E, Frontera G, Ruiz X, Vicens A, Ozonas M, Pizá P. Concomitant carcinoma in situ  
23  
24 and tumour size are prognostic factors for bladder recurrence after nephroureterectomy  
25  
26 for upper tract transitional cell carcinoma. *BJU Int.* 2010;106(9):1319–1323.  
27  
28  
29  
30 17. Wolbers M, Koller MT, Witteman JC, Steyerberg EW. Prognostic models with  
31  
32 competing risks: Methods and application to coronary risk prediction. *Epidemiology.*  
33  
34 2009;20(4):555-61.  
35  
36  
37  
38  
39 18. Noordzij M, Leffondre K, van Stralen KJ, Zoccali C, Dekker FW, Jager KJ. When do  
40  
41 we need competing risks methods for survival analysis in nephrology? *Nephrology*  
42  
43 *Dialysis Transplantation.* 2013;28(11):2670-7.  
44  
45  
46 19. He, C, Zhang, Y, Cai, Z, Lin, X, Li, S. Overall survival and cancer-specific survival in  
47  
48 patients with surgically resected pancreatic head adenocarcinoma: A competing risk  
49  
50 nomogram analysis. *J Cancer*, 2018. 9(17): p. 3156-3167.20.  
51  
52  
53 20. Yang, J, Pan, Z, He, Y, Zhao, F, Feng, X, Liu, Q, Lyu, J. Competing-risks model for  
54  
55 predicting the prognosis of penile cancer based on the SEER database. *Cancer Med*,  
56  
57 2019. 8(18): p. 7881-7889.  
58  
59  
60



- 1  
2  
3  
4 21. Soria F, Shariat SF, Lerner SP, Fritsche H-M, Rink M, Kassouf W, Spiess PE, Lotan Y,  
5  
6 Ye D, Fernández MI et al. Epidemiology, diagnosis, preoperative evaluation and  
7  
8 prognostic assessment of upper-tract urothelial carcinoma (utuc). World Journal of  
9  
10 Urology. 2016;35(3):379-87.  
11  
12  
13  
14  
15 22. Ludbrook J, Royle AG. Analysing clinical studies: Principles, practice and pitfalls of  
16  
17 kaplan–meier plots. ANZ Journal of Surgery. 2008;78(3):204-10.  
18  
19  
20  
21 23. Putter H, Fiocco M, Geskus RB. Tutorial in biostatistics: Competing risks and multi-state  
22  
23 models. Statistics in Medicine. 2007;26(11):2389-430.  
24  
25  
26  
27 24. Fine JP, Gray RJ. A proportional hazards model for the subdistribution of a competing  
28  
29 risk. Journal of the American Statistical Association. 1999;94(446):496-509.  
30  
31  
32  
33  
34  
35  
36  
37 25. Kutikov A, Egleston BL, Canter D, Smaldone MC, Wong YN, Uzzo RG. Competing  
38  
39 risks of death in patients with localized renal cell carcinoma: A comorbidity based model.  
40  
41 Journal Of Urology. 2012;188(6):2077-83.  
42  
43  
44  
45 26. Bradshaw PT, Stevens J, Khankari N, Teitelbaum SL, Neugut AI, Gammon MD.  
46  
47 Cardiovascular disease mortality among breast cancer survivors. Epidemiology.  
48  
49 2016;27(1):6-13.  
50  
51  
52  
53  
54 27. Margulis V, Shariat SF, Matin SF, Kamat AM, Zigeuner R, Kikuchi E, Lotan Y, Weizer  
55  
56 A, Raman JD, Wood CG et al. Outcomes of radical nephroureterectomy: A series from  
57  
58  
59  
60

- 1  
2  
3  
4 the upper tract urothelial carcinoma collaboration. *Cancer*. 2009;115(6):1224-33.  
5  
6  
7  
8 28. Yap SA, Schupp CW, Chamie K, Evans CP, Koppie TM. Effect of age on transitional cell  
9  
10 carcinoma of the upper urinary tract: Presentation, treatment, and outcomes. *Urology*.  
11  
12 2011;78(1):87-92.  
13  
14  
15  
16 29. Leow JJ, Orsola A, Chang SL, Bellmunt J. A contemporary review of management and  
17  
18 prognostic factors of upper tract urothelial carcinoma. *Cancer Treat Rev*.  
19  
20 2015;41(4):310-9.  
21  
22  
23  
24  
25 30. Lughezzani G, Sun M, Perrotte P, Shariat SF, Jeldres C, Budäus L, Latour M, Widmer H,  
26  
27 Duclos A, Bénard F et al. Gender-related differences in patients with stage i to iii upper  
28  
29 tract urothelial carcinoma: Results from the surveillance, epidemiology, and end results  
30  
31 database. *Urology*. 2010;75(2):321-7.  
32  
33  
34  
35  
36 31. Espiritu PN, Sverrisson EF, Sexton WJ, Pow-Sang JM, Poch MA, Dhillon J, Spiess PE.  
37  
38 Effect of tumor size on recurrence-free survival of upper tract urothelial carcinoma  
39  
40 following surgical resection. *Urol Oncol*. 2014;32(5):619-24.  
41  
42  
43  
44  
45 32. Freifeld, Y., et al., Therapeutic strategies for upper tract urothelial carcinoma. *Expert Rev*  
46  
47 *Anticancer Ther*, 2018. 18(8): p. 765-774.33. T S, RE K, J B, M R, JJ L, SR L, MW V,  
48  
49 MA P, N H, AS K et al. - effectiveness of adjuvant chemotherapy after radical  
50  
51 nephroureterectomy for. D - 8309333. (- 1527-7755 (Electronic)):- 852-60.  
52  
53  
54  
55  
56 34. Leow JJ, Martin-Doyle W, Fay AP, Choueiri TK, Chang SL, Bellmunt J. A systematic  
57  
58 review and meta-analysis of adjuvant and neoadjuvant chemotherapy for upper tract  
59  
60

- 1  
2  
3  
4 urothelial carcinoma. *European Urology*. 2014;66(3):529-41.  
5  
6  
7  
8 35. Roupret M, Babjuk M, Comperat E, Zigeuner R, Sylvester R, Burger M, Cowan N, Bohle  
9  
10 A, Van Rhijn BWG, Kaasinen E et al. European guidelines on upper tract urothelial  
11  
12 carcinomas: 2013 update. *European Urology*. 2013;63(6):1059-71.  
13  
14  
15  
16 36. Bolenz C, Fernández MI, Trojan L, Herrmann E, Becker A, Weiss C, Alken P, Ströbel P,  
17  
18 Michel MS. Lymphovascular invasion and pathologic tumor stage are significant  
19  
20 outcome predictors for patients with upper tract urothelial carcinoma. *Urology*.  
21  
22 2008;72(2):364-9.  
23  
24  
25  
26  
27 37. Jin C, Deng X, Li Y, He W, Yang X, Liu J. Lymph node ratio is an independent  
28  
29 prognostic factor for rectal cancer after neoadjuvant therapy: A meta-analysis. *J Evid*  
30  
31 *Based Med*. 2018;11(3):169-75.  
32  
33  
34  
35  
36 38. Vinh-Hung V, Verkooijen HM, Fioretta G, Neyroud-Caspar I, Rapiti E, Vlastos G,  
37  
38 Deglise C, Usel M, Lutz JM, Bouchardy C. Lymph node ratio as an alternative to pn  
39  
40 staging in node-positive breast cancer. *J Clin Oncol*. 2009;27(7):1062-8.  
41  
42  
43  
44  
45  
46  
47  
48  
49  
50  
51  
52  
53  
54  
55  
56  
57  
58  
59  
60

Table 1 The basic characteristics of the patients in this study.

| Variables                 | Training Cohort      | Validation Cohort    | <i>p</i> |
|---------------------------|----------------------|----------------------|----------|
| Number of Patients, n (%) | 1803(70%)            | 773(30%)             |          |
| Age, Median (IQR)         | 71.00 (64.00, 78.00) | 71.00 (63.00, 78.00) | 0.710    |
| Sex, n (%)                |                      |                      | 0.150    |
| Female                    | 711 (39.4)           | 329 (42.6)           |          |
| Male                      | 1092 (60.6)          | 444 (57.4)           |          |
| Race, n (%)               |                      |                      | 0.045    |
| Black                     | 80 ( 4.4)            | 50 ( 6.5)            |          |
| Other                     | 169 ( 9.4)           | 83 (10.7)            |          |
| White                     | 1554 (86.2)          | 640 (82.8)           |          |
| Marital status, n (%)     |                      |                      | 0.656    |
| Married                   | 1565 (86.8)          | 677 (87.6)           |          |
| Others                    | 67 ( 3.7)            | 31 ( 4.0)            |          |
| Single                    | 171 ( 9.5)           | 65 ( 8.4)            |          |
| Year, n (%)               |                      |                      | 0.813    |
| 2004-2006                 | 346 (19.2)           | 159 (20.6)           |          |
| 2007-2009                 | 439 (24.3)           | 181 (23.4)           |          |
| 2010-2012                 | 479 (26.6)           | 198 (25.6)           |          |
| 2013-2015                 | 539 (29.9)           | 235 (30.4)           |          |
| Site, n (%)               |                      |                      | 0.609    |
| Renal pelvis              | 1152 (63.9)          | 485 (62.7)           |          |
| Ureter                    | 651 (36.1)           | 288 (37.3)           |          |

|    |                           |             |            |       |
|----|---------------------------|-------------|------------|-------|
| 1  |                           |             |            |       |
| 2  |                           |             |            |       |
| 3  |                           |             |            |       |
| 4  | Grade, n (%)              |             |            | 0.481 |
| 5  |                           |             |            |       |
| 6  | Grade I                   | 47 ( 2.6)   | 16 ( 2.1)  |       |
| 7  |                           |             |            |       |
| 8  | Grade II                  | 149 ( 8.3)  | 69 ( 8.9)  |       |
| 9  |                           |             |            |       |
| 10 | Grade III                 | 559 (31.0)  | 258 (33.4) |       |
| 11 |                           |             |            |       |
| 12 | Grade IV                  | 1048 (58.1) | 430 (55.6) |       |
| 13 |                           |             |            |       |
| 14 |                           |             |            |       |
| 15 | Size, n (%)               |             |            | 0.188 |
| 16 |                           |             |            |       |
| 17 | [2,4)                     | 559 (31.0)  | 268 (34.7) |       |
| 18 |                           |             |            |       |
| 19 | <2                        | 262 (14.5)  | 106 (13.7) |       |
| 20 |                           |             |            |       |
| 21 | >=4                       | 982 (54.5)  | 399 (51.6) |       |
| 22 |                           |             |            |       |
| 23 |                           |             |            |       |
| 24 |                           |             |            |       |
| 25 | Laterality, n (%)         |             |            | 0.551 |
| 26 |                           |             |            |       |
| 27 | Left                      | 995 (55.2)  | 416 (53.8) |       |
| 28 |                           |             |            |       |
| 29 | Right                     | 808 (44.8)  | 357 (46.2) |       |
| 30 |                           |             |            |       |
| 31 |                           |             |            |       |
| 32 | Surgery, n (%)            |             |            | 0.203 |
| 33 |                           |             |            |       |
| 34 | NO/Unknown                | 9 ( 0.5)    | 8 ( 1.0)   |       |
| 35 |                           |             |            |       |
| 36 | Yes                       | 1794 (99.5) | 765 (99.0) |       |
| 37 |                           |             |            |       |
| 38 |                           |             |            |       |
| 39 | Radiotherapy, n (%)       |             |            | 0.931 |
| 40 |                           |             |            |       |
| 41 | NO/Unknown                | 1676 (93.0) | 720 (93.1) |       |
| 42 |                           |             |            |       |
| 43 | Yes                       | 127 ( 7.0)  | 53 ( 6.9)  |       |
| 44 |                           |             |            |       |
| 45 |                           |             |            |       |
| 46 | Chemotherapy, n (%)       |             |            | 0.938 |
| 47 |                           |             |            |       |
| 48 | NO/Unknown                | 1243 (68.9) | 531 (68.7) |       |
| 49 |                           |             |            |       |
| 50 | Yes                       | 560 (31.1)  | 242 (31.3) |       |
| 51 |                           |             |            |       |
| 52 |                           |             |            |       |
| 53 | Distant metastasis, n (%) |             |            | 0.053 |
| 54 |                           |             |            |       |
| 55 | M0                        | 1652 (91.6) | 689 (89.1) |       |
| 56 |                           |             |            |       |
| 57 |                           |             |            |       |
| 58 |                           |             |            |       |
| 59 |                           |             |            |       |
| 60 |                           |             |            |       |

|                   |                   |                   |       |
|-------------------|-------------------|-------------------|-------|
| M1                | 151 ( 8.4)        | 84 (10.9)         |       |
| LNE, Median (IQR) | 3.00 (1.00, 7.00) | 3.00 (1.00, 7.00) | 0.627 |
| LNP, Median (IQR) | 0.00 (0.00, 1.00) | 0.00 (0.00, 1.00) | 0.542 |
| LNR, Median (IQR) | 0.00 (0.00, 0.50) | 0.00 (0.00, 0.33) | 0.546 |

---

Abbreviations: IQR, interquartile-range; COD, cause of death; LNE, lymph nodes examined; LNP, lymph nodes positive; LNR, lymph nodes ratio.

For peer review only

Table 2 The cumulative incidences of CSD and DOC among patients with UTUC.

| Variables      | Cause-specific death (%) |                        |                        |        | Death due to other causes (%) |                        |                        |        |
|----------------|--------------------------|------------------------|------------------------|--------|-------------------------------|------------------------|------------------------|--------|
|                | 3-Year (95%CI)           | 5-Year (95%CI)         | 8-Year (95%CI)         | P      | 3-Year (95%CI)                | 5-Year (95%CI)         | 8-Year (95%CI)         | P      |
| Age            |                          |                        |                        | <0.001 |                               |                        |                        | <0.001 |
| Sex            |                          |                        |                        | <0.001 |                               |                        |                        | <0.001 |
| Male           | 22.903 (22.843-22.964)   | 27.131 (27.064-27.197) | 29.457 (29.386-29.528) |        | 25.697 (25.634-25.760)        | 33.645 (33.573-33.717) | 40.755 (40.673-40.837) |        |
| Female         | 33.320 (33.236-33.405)   | 38.157 (38.066-38.247) | 40.339 (40.245-40.434) |        | 18.710 (18.639-18.780)        | 24.144 (24.063-24.225) | 29.031 (28.937-29.125) |        |
| Race           |                          |                        |                        | 0.008  |                               |                        |                        | 0.057  |
| White          | 25.881 (25.828-25.934)   | 29.921 (29.864-29.979) | 31.856 (31.796-31.916) |        | 23.502 (23.451-23.554)        | 30.839 (30.780-30.898) | 37.596 (37.528-37.664) |        |
| Black          | 35.688 (35.423-35.952)   | 44.479 (44.194-44.763) | 48.470 (48.178-48.762) |        | 22.782 (22.555-23.009)        | 27.889 (27.638-28.139) | 30.253 (29.987-30.519) |        |
| Other          | 33.577 (33.399-33.755)   | 39.945 (39.752-40.138) | 43.895 (43.688-44.102) |        | 17.728 (17.586-17.869)        | 22.120 (21.960-22.281) | 25.822 (25.642-26.003) |        |
| Marital status |                          |                        |                        | 0.589  |                               |                        |                        | 0.861  |
| Married        | 26.658 (26.605-26.711)   | 31.026 (30.968-31.083) | 33.392 (33.330-33.453) |        | 23.164 (23.113-23.215)        | 30.058 (30.000-30.117) | 36.522 (36.455-36.589) |        |
| Single         | 28.974 (28.808-29.140)   | 35.046 (34.863-35.229) | 37.001 (36.813-37.189) |        | 20.973 (20.824-21.122)        | 28.316 (28.143-28.489) | 32.867 (32.676-33.058) |        |

|                |                        |                        |                        |                        |                        |                        |
|----------------|------------------------|------------------------|------------------------|------------------------|------------------------|------------------------|
| Others         | 30.406 (30.132-30.681) | 32.762 (32.475-33.048) | 32.762 (32.475-33.048) | 22.481 (22.231-22.730) | 30.490 (30.186-30.794) | 35.083 (34.731-35.436) |
| Year           |                        |                        |                        | 0.426                  |                        | 0.523                  |
| 2004-2006      | 27.535 (27.424-27.646) | 31.905 (31.789-32.021) | 33.656 (33.538-33.773) | 24.057 (23.951-24.164) | 32.211 (32.095-32.327) | 38.629 (38.508-38.750) |
| 2007-2009      | 29.665 (29.564-29.765) | 34.035 (33.930-34.139) | 36.463 (36.356-36.569) | 22.606 (22.513-22.698) | 28.351 (28.252-28.451) | 34.151 (34.045-34.256) |
| 2010-2012      | 26.033 (25.940-26.126) | 30.269 (30.170-30.368) | —                      | 21.838 (21.751-21.926) | 28.813 (28.715-28.910) | —                      |
| 2013-2015      | 25.678 (25.572-25.784) | 29.114 (28.976-29.252) | 29.114 (28.976-29.252) | 23.766 (23.661-23.871) | 27.273 (27.135-27.411) | 27.273 (27.135-27.411) |
| Site           |                        |                        |                        | <0.001                 |                        | 0.161                  |
| Renal pelvis   | 30.986 (30.921-31.051) | 36.259 (36.189-36.329) | 38.503 (38.430-38.577) | 22.942 (22.883-23.001) | 28.605 (28.539-28.672) | 33.500 (33.425-33.576) |
| Ureter         | 19.946 (19.870-20.021) | 23.033 (22.951-23.114) | 25.368 (25.279-25.456) | 22.948 (22.868-23.028) | 32.131 (32.037-32.225) | 40.713 (40.604-40.822) |
| Grade          |                        |                        |                        | <0.001                 |                        | 0.043                  |
| Well           | 13.707 (13.463-13.950) | 13.707 (13.463-13.950) | 13.707 (13.463-13.950) | 18.635 (18.356-18.914) | 21.710 (21.406-22.015) | 40.163 (39.717-40.609) |
| Moderate       | 10.664 (10.543-10.785) | 13.393 (13.255-13.530) | 15.852 (15.696-16.008) | 10.147 (10.028-10.267) | 18.691 (18.530-18.853) | 27.546 (27.340-27.752) |
| Poor           | 30.407 (30.315-30.498) | 35.156 (35.059-35.253) | 37.336 (37.236-37.437) | 24.420 (24.335-24.506) | 30.727 (30.633-30.822) | 36.164 (36.060-36.269) |
| Undifferential | 28.133 (28.066-28.200) | 33.013 (32.939-33.086) | 35.492 (35.413-35.572) | 24.207 (24.142-24.271) | 31.584 (31.510-31.658) | 37.338 (37.252-37.424) |



|    |              |                        |                        |                        |                        |                        |                        |  |       |
|----|--------------|------------------------|------------------------|------------------------|------------------------|------------------------|------------------------|--|-------|
| 1  |              |                        |                        |                        |                        |                        |                        |  |       |
| 2  |              |                        |                        |                        |                        |                        |                        |  |       |
| 3  |              |                        |                        |                        |                        |                        |                        |  |       |
| 4  |              |                        |                        |                        |                        |                        |                        |  |       |
| 5  | Size         |                        |                        |                        | <0.001                 |                        |                        |  | 0.727 |
| 6  |              |                        |                        |                        |                        |                        |                        |  |       |
| 7  | <2           | 11.702 (11.603-11.801) | 15.012 (14.896-15.129) | 18.912 (18.770-19.054) | 23.698 (23.568-23.828) | 30.965 (30.815-31.114) | 41.203 (41.019-41.386) |  |       |
| 8  |              |                        |                        |                        |                        |                        |                        |  |       |
| 9  | [2,4)        | 20.339 (20.257-20.421) | 25.968 (25.875-26.061) | 27.430 (27.333-27.527) | 21.685 (21.601-21.769) | 29.688 (29.589-29.787) | 38.966 (38.846-39.085) |  |       |
| 10 |              |                        |                        |                        |                        |                        |                        |  |       |
| 11 | ≥4           | 34.800 (34.728-34.872) | 38.856 (38.781-38.932) | 41.137 (41.058-41.216) | 23.457 (23.393-23.521) | 29.756 (29.684-29.828) | 33.400 (33.322-33.479) |  |       |
| 12 |              |                        |                        |                        |                        |                        |                        |  |       |
| 13 |              |                        |                        |                        |                        |                        |                        |  |       |
| 14 | Laterality   |                        |                        |                        | 0.944                  |                        |                        |  | 0.393 |
| 15 |              |                        |                        |                        |                        |                        |                        |  |       |
| 16 | Left         | 26.970 (26.903-27.037) | 31.835 (31.762-31.908) | 33.636 (33.560-33.713) | 22.586 (22.523-22.650) | 29.551 (29.479-29.624) | 35.006 (34.923-35.089) |  |       |
| 17 |              |                        |                        |                        |                        |                        |                        |  |       |
| 18 | Right        | 27.092 (27.017-27.167) | 31.010 (30.929-31.091) | 33.867 (33.781-33.954) | 23.335 (23.264-23.406) | 30.305 (30.223-30.387) | 37.564 (37.469-37.659) |  |       |
| 19 |              |                        |                        |                        |                        |                        |                        |  |       |
| 20 |              |                        |                        |                        |                        |                        |                        |  |       |
| 21 | Surgery      |                        |                        |                        | 0.001                  |                        |                        |  | 0.980 |
| 22 |              |                        |                        |                        |                        |                        |                        |  |       |
| 23 | Yes          | 26.715 (26.665-26.765) | 31.206 (31.152-31.260) | 33.490 (33.432-33.547) | 22.940 (22.893-22.988) | 29.950 (29.895-30.004) | 36.234 (36.171-36.296) |  |       |
| 24 |              |                        |                        |                        |                        |                        |                        |  |       |
| 25 | NO/Unknown   | 77.778 (76.910-78.646) | —                      | —                      | 22.222 (21.522-22.923) | —                      | —                      |  |       |
| 26 |              |                        |                        |                        |                        |                        |                        |  |       |
| 27 |              |                        |                        |                        |                        |                        |                        |  |       |
| 28 | Radiotherapy |                        |                        |                        | <0.001                 |                        |                        |  | 0.998 |
| 29 |              |                        |                        |                        |                        |                        |                        |  |       |
| 30 | Yes          | 44.203 (43.994-44.413) | 50.656 (50.438-50.873) | 52.100 (51.879-52.321) | 25.971 (25.788-26.155) | 32.137 (31.936-32.339) | 34.905 (34.692-35.117) |  |       |
| 31 |              |                        |                        |                        |                        |                        |                        |  |       |
| 32 | NO/Unknown   | 25.670 (25.619-25.721) | 29.946 (29.891-30.001) | 32.280 (32.221-32.339) | 22.699 (22.650-22.748) | 29.723 (29.667-29.779) | 36.255 (36.190-36.320) |  |       |
| 33 |              |                        |                        |                        |                        |                        |                        |  |       |
| 34 |              |                        |                        |                        |                        |                        |                        |  |       |
| 35 | Chemotherapy |                        |                        |                        | <0.001                 |                        |                        |  | 0.003 |
| 36 |              |                        |                        |                        |                        |                        |                        |  |       |
| 37 |              |                        |                        |                        |                        |                        |                        |  |       |
| 38 |              |                        |                        |                        |                        |                        |                        |  |       |
| 39 |              |                        |                        |                        |                        |                        |                        |  |       |
| 40 |              |                        |                        |                        |                        |                        |                        |  |       |
| 41 |              |                        |                        |                        |                        |                        |                        |  |       |
| 42 |              |                        |                        |                        |                        |                        |                        |  |       |
| 43 |              |                        |                        |                        |                        |                        |                        |  |       |
| 44 |              |                        |                        |                        |                        |                        |                        |  |       |
| 45 |              |                        |                        |                        |                        |                        |                        |  |       |
| 46 |              |                        |                        |                        |                        |                        |                        |  |       |

|    |                                                                                                                       |                        |                        |                        |                        |                        |                        |   |        |
|----|-----------------------------------------------------------------------------------------------------------------------|------------------------|------------------------|------------------------|------------------------|------------------------|------------------------|---|--------|
| 1  |                                                                                                                       |                        |                        |                        |                        |                        |                        |   |        |
| 2  |                                                                                                                       |                        |                        |                        |                        |                        |                        |   |        |
| 3  |                                                                                                                       |                        |                        |                        |                        |                        |                        |   |        |
| 4  |                                                                                                                       |                        |                        |                        |                        |                        |                        |   |        |
| 5  | Yes                                                                                                                   | 36.276 (36.177-36.375) | 41.780 (41.674-41.885) | 43.328 (43.220-43.436) | 20.156 (20.074-20.239) | 26.842 (26.746-26.938) | 30.774 (30.670-30.879) |   |        |
| 6  |                                                                                                                       |                        |                        |                        |                        |                        |                        |   |        |
| 7  | NO/Unknown                                                                                                            | 22.979 (22.922-23.035) | 27.025 (26.964-27.087) | 29.597 (29.530-29.664) | 24.177 (24.119-24.235) | 31.265 (31.200-31.331) | 38.492 (38.416-38.569) |   |        |
| 8  |                                                                                                                       |                        |                        |                        |                        |                        |                        |   |        |
| 9  |                                                                                                                       |                        |                        |                        |                        |                        |                        |   |        |
| 10 | Distant metastasis                                                                                                    |                        |                        |                        | <0.001                 |                        |                        |   | 0.641  |
| 11 |                                                                                                                       |                        |                        |                        |                        |                        |                        |   |        |
| 12 | No                                                                                                                    | 23.438 (23.388-23.488) | 28.067 (28.012-28.122) | 30.550 (30.491-30.609) | 22.674 (22.624-22.723) | 29.966 (29.909-30.024) | 36.800 (36.734-36.866) |   |        |
| 13 |                                                                                                                       |                        |                        |                        |                        |                        |                        |   |        |
| 14 | Yes                                                                                                                   | 65.586 (65.407-65.765) | 67.967 (67.789-68.144) | 67.967 (67.789-68.144) | 25.548 (25.384-25.713) | 28.750 (28.577-28.922) | 28.750 (28.577-28.922) |   |        |
| 15 |                                                                                                                       |                        |                        |                        |                        |                        |                        |   |        |
| 16 |                                                                                                                       |                        |                        |                        |                        |                        |                        |   |        |
| 17 | LNE                                                                                                                   | —                      | —                      | —                      | <0.001                 | —                      | —                      | — | 0.941  |
| 18 |                                                                                                                       |                        |                        |                        |                        |                        |                        |   |        |
| 19 | LNP                                                                                                                   | —                      | —                      | —                      | <0.001                 | —                      | —                      | — | 0.448  |
| 20 |                                                                                                                       |                        |                        |                        |                        |                        |                        |   |        |
| 21 | LNR                                                                                                                   | —                      | —                      | —                      | <0.001                 | —                      | —                      | — | <0.001 |
| 22 |                                                                                                                       |                        |                        |                        |                        |                        |                        |   |        |
| 23 |                                                                                                                       |                        |                        |                        |                        |                        |                        |   |        |
| 24 |                                                                                                                       |                        |                        |                        |                        |                        |                        |   |        |
| 25 |                                                                                                                       |                        |                        |                        |                        |                        |                        |   |        |
| 26 |                                                                                                                       |                        |                        |                        |                        |                        |                        |   |        |
| 27 | Abbreviations: CI, confidence interval; LNE, lymph nodes examined; LNP, lymph nodes positive; LNR, lymph nodes ratio. |                        |                        |                        |                        |                        |                        |   |        |
| 28 |                                                                                                                       |                        |                        |                        |                        |                        |                        |   |        |
| 29 |                                                                                                                       |                        |                        |                        |                        |                        |                        |   |        |
| 30 |                                                                                                                       |                        |                        |                        |                        |                        |                        |   |        |
| 31 |                                                                                                                       |                        |                        |                        |                        |                        |                        |   |        |
| 32 |                                                                                                                       |                        |                        |                        |                        |                        |                        |   |        |
| 33 |                                                                                                                       |                        |                        |                        |                        |                        |                        |   |        |
| 34 |                                                                                                                       |                        |                        |                        |                        |                        |                        |   |        |
| 35 |                                                                                                                       |                        |                        |                        |                        |                        |                        |   |        |
| 36 |                                                                                                                       |                        |                        |                        |                        |                        |                        |   |        |
| 37 |                                                                                                                       |                        |                        |                        |                        |                        |                        |   |        |
| 38 |                                                                                                                       |                        |                        |                        |                        |                        |                        |   |        |
| 39 |                                                                                                                       |                        |                        |                        |                        |                        |                        |   |        |
| 40 |                                                                                                                       |                        |                        |                        |                        |                        |                        |   |        |
| 41 |                                                                                                                       |                        |                        |                        |                        |                        |                        |   |        |
| 42 |                                                                                                                       |                        |                        |                        |                        |                        |                        |   |        |
| 43 |                                                                                                                       |                        |                        |                        |                        |                        |                        |   |        |
| 44 |                                                                                                                       |                        |                        |                        |                        |                        |                        |   |        |
| 45 |                                                                                                                       |                        |                        |                        |                        |                        |                        |   |        |
| 46 |                                                                                                                       |                        |                        |                        |                        |                        |                        |   |        |

Table 3 Selected variables by proportional subdistribution hazard model and multivariate cause-specific hazards model.

| Variables      | Proportional subdistribution hazards model |           |             |          | Cause-specific hazards model |           |             |          |
|----------------|--------------------------------------------|-----------|-------------|----------|------------------------------|-----------|-------------|----------|
|                | Coefficient                                | sdHR      | 95%CI       | <i>P</i> | Coefficient                  | csHR      | 95%CI       | <i>P</i> |
| Age            | -0.004                                     | 0.996     | 0.987-1.005 | 0.339    | 0.009                        | 1.009     | 1.000-1.018 | 0.043    |
| Sex            |                                            |           |             |          |                              |           |             |          |
| Male           |                                            | Reference |             |          |                              | Reference |             |          |
| Female         | 0.393                                      | 1.481     | 1.243-1.766 | <.0001   | 0.307                        | 1.360     | 1.141-1.620 | 0.001    |
| Race           |                                            |           |             |          |                              |           |             |          |
| White          |                                            | Reference |             |          |                              | Reference |             |          |
| Black          | 0.240                                      | 1.272     | 0.872-1.856 | 0.212    | 0.347                        | 1.414     | 0.988-2.024 | 0.058    |
| Other          | 0.200                                      | 1.222     | 0.930-1.606 | 0.151    | 0.164                        | 1.178     | 0.899-1.544 | 0.235    |
| Site           |                                            |           |             |          |                              |           |             |          |
| Renal pelvis   |                                            | Reference |             |          |                              | Reference |             |          |
| Ureter         | -0.106                                     | 0.900     | 0.737-1.097 | 0.296    | -0.096                       | 0.909     | 0.740-1.117 | 0.362    |
| Grade          |                                            |           |             |          |                              |           |             |          |
| Well           |                                            | Reference |             |          |                              | Reference |             |          |
| Moderate       | -0.034                                     | 0.966     | 0.398-2.344 | 0.939    | 0.009                        | 1.009     | 0.407-2.501 | 0.985    |
| Poor           | 0.763                                      | 2.144     | 0.970-4.738 | 0.059    | 0.902                        | 2.463     | 1.091-5.563 | 0.030    |
| Undifferential | 0.658                                      | 1.932     | 0.878-4.249 | 0.102    | 0.773                        | 2.167     | 0.963-4.878 | 0.062    |
| Size           |                                            |           |             |          |                              |           |             |          |
| <2             |                                            | Reference |             |          |                              | Reference |             |          |
| [2,4)          | 0.447                                      | 1.563     | 1.098-2.226 | 0.013    | 0.425                        | 1.529     | 1.054-2.219 | 0.025    |

|                    |           |       |             |        |           |       |             |        |
|--------------------|-----------|-------|-------------|--------|-----------|-------|-------------|--------|
| ≥4                 | 0.790     | 2.204 | 1.575-3.086 | <.0001 | 0.878     | 2.407 | 1.686-3.436 | <.0001 |
| Surgery            |           |       |             |        |           |       |             |        |
| Yes                | Reference |       |             |        | Reference |       |             |        |
| NO/Unknown         | 0.786     | 2.195 | 1.289-3.738 | 0.004  | 0.741     | 2.098 | 0.979-4.492 | 0.057  |
| Radiotherapy       |           |       |             |        |           |       |             |        |
| Yes                | Reference |       |             |        | Reference |       |             |        |
| NO/Unknown         | -0.229    | 0.795 | 0.588-1.075 | 0.136  | -0.261    | 0.771 | 0.583-1.019 | 0.067  |
| Chemotherapy       |           |       |             |        |           |       |             |        |
| Yes                | Reference |       |             |        | Reference |       |             |        |
| NO/Unknown         | 0.021     | 1.021 | 0.826-1.263 | 0.848  | 0.157     | 1.170 | 0.959-1.428 | 0.122  |
| Distant metastasis |           |       |             |        |           |       |             |        |
| No                 | Reference |       |             |        | Reference |       |             |        |
| Yes                | 0.883     | 2.419 | 1.847-3.169 | <.0001 | 1.255     | 3.509 | 2.751-4.476 | <.0001 |
| LNE                | -0.012    | 0.988 | 0.970-1.006 | 0.196  | -0.013    | 0.987 | 0.972-1.002 | 0.090  |
| LNP                | 0.062     | 1.064 | 1.022-1.107 | 0.002  | 0.068     | 1.070 | 1.030-1.111 | 0.000  |
| LNR                | 0.627     | 1.871 | 1.434-2.442 | <.0001 | 0.925     | 2.522 | 1.947-3.266 | <.0001 |

Abbreviations: sdHR, subdistribution hazard ratio; csHR, Cause-specific hazard ratio; LNE, lymph nodes examined; LNP, lymph nodes positive; LNR, lymph nodes ratio.

## Figure legends

**Figure 1.** Data selection flowchart.

**Figure 2.** The CIF curves of UTUC cancer-specific death (CSD). Race, primary site, tumor size, surgery status, radiotherapy status, distant metastasis, LNE, and LNP were significantly related to the patients of CSD. LNE: lymph nodes examined; LNP: lymph nodes positive.

**Figure 3.** Nomogram based on the competing risk analysis to predict cancer-specific death probabilities at 3, 5, and 8 years for UTUC patients. LNE: lymph nodes examined; LNP: lymph nodes positive.

**Figure 4.** Calibration curves. Calibration curves for 3, 5, and 8 years calibration plots of the training (A, B, C) and validation (D, E, F) cohort.

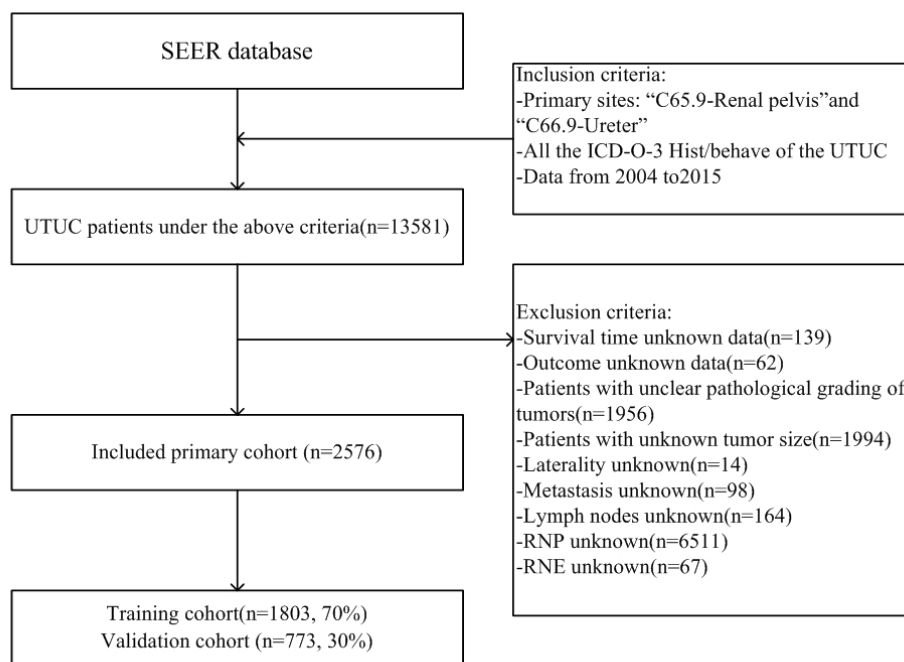

Figure 1. Data selection flowchart.

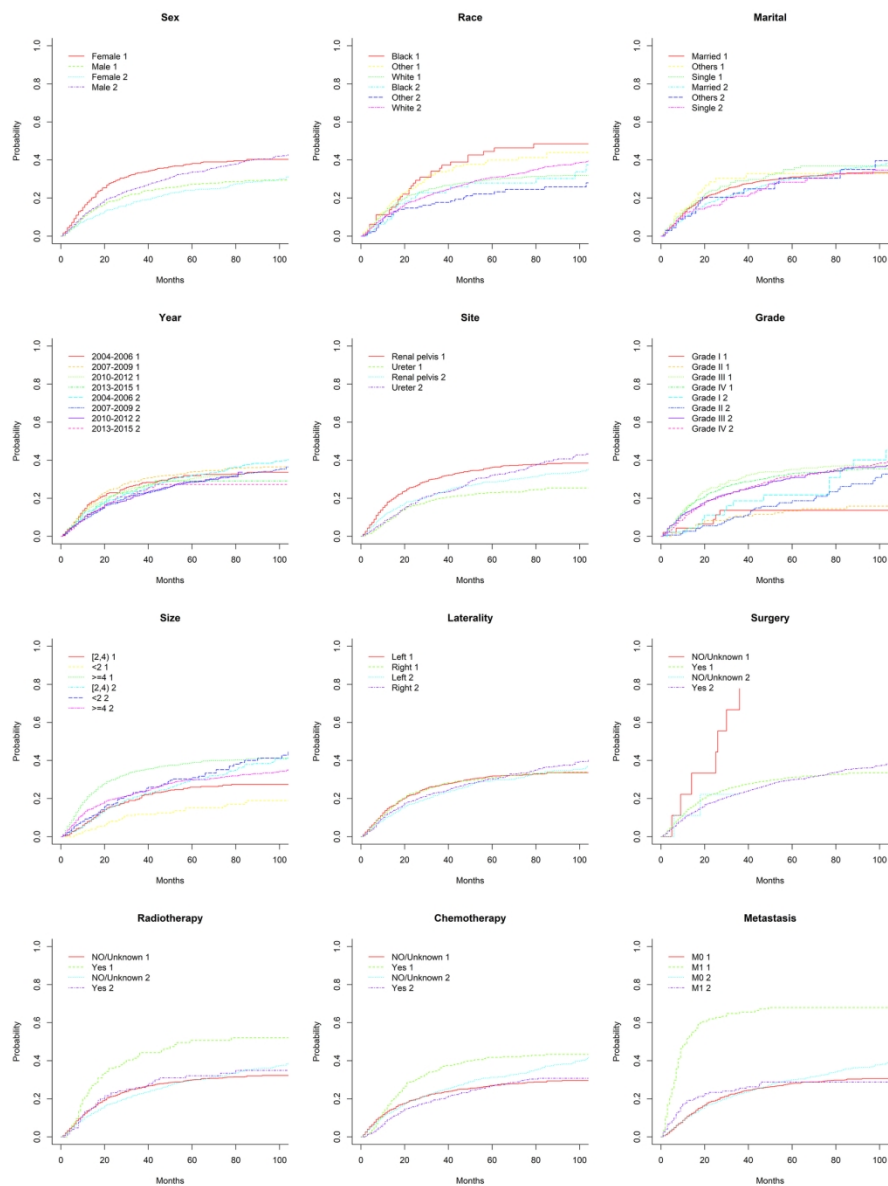

Figure 2. The CIF curves of UTUC cancer-specific death (CSD). Race, primary site, tumor size, surgery status, radiotherapy status, distant metastasis, LNE, and LNP were significantly related to the patients of CSD. LNE: lymph nodes examined; LNP: lymph nodes positive.

149x199mm (300 x 300 DPI)

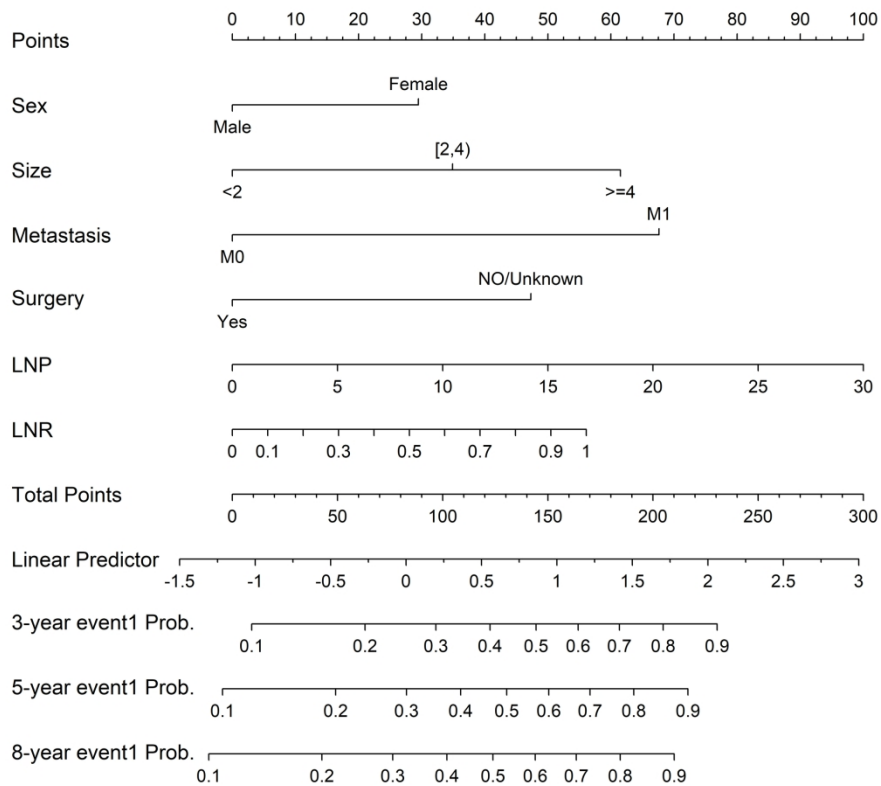

Figure 3. Nomogram based on the competing risk analysis to predict cancer-specific death probabilities at 3, 5, and 8 years for UTUC patients. LNE: lymph nodes examined; LNP: lymph nodes positive.

203x203mm (300 x 300 DPI)



1  
2  
3  
4  
5  
6  
7  
8  
9  
10  
11  
12  
13  
14  
15  
16  
17  
18  
19  
20  
21  
22  
23  
24  
25  
26  
27  
28  
29  
30  
31  
32  
33  
34  
35  
36  
37  
38  
39  
40  
41  
42  
43  
44  
45  
46  
47  
48  
49  
50  
51  
52  
53  
54  
55  
56  
57  
58  
59  
60

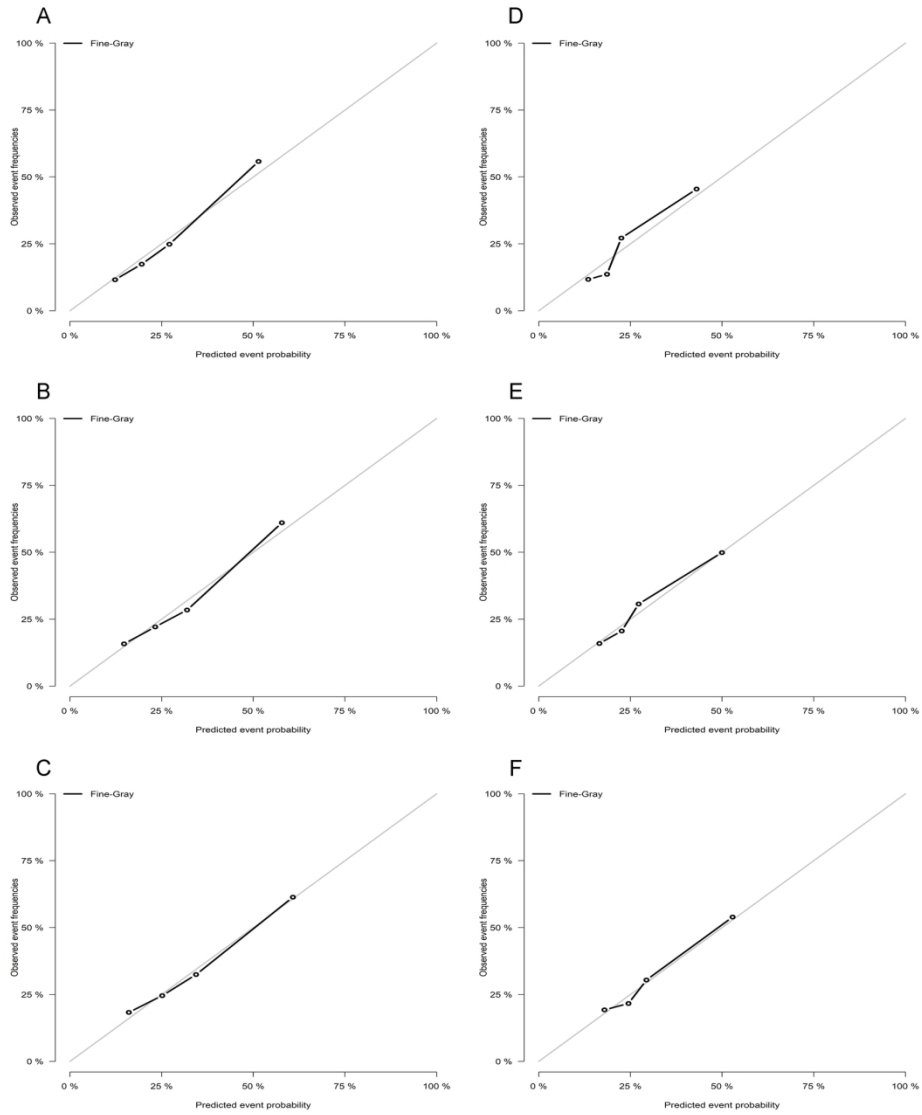

Figure 4. Calibration curves. Calibration curves for 3, 5, and 8 years calibration plots of the training (A, B, C) and validation (D, E, F) cohort.

160x186mm (300 x 300 DPI)

## TRIPOD Checklist: Prediction Model Development

| Section                   | Item | Checklist description                                                                                                                                                                            | Reported on Page Number/Line Number | Reported on Section/Paragraph |
|---------------------------|------|--------------------------------------------------------------------------------------------------------------------------------------------------------------------------------------------------|-------------------------------------|-------------------------------|
| <b>Title and abstract</b> |      |                                                                                                                                                                                                  |                                     |                               |
| Title                     | 1    | Identify the study as developing and/or validating a multivariable prediction model, the target population, and the outcome to be predicted.                                                     |                                     |                               |
| Abstract                  | 2    | Provide a summary of objectives, study design, setting, participants, sample size, predictors, outcome, statistical analysis, results, and conclusions.                                          |                                     |                               |
| <b>Introduction</b>       |      |                                                                                                                                                                                                  |                                     |                               |
| Background and objectives | 3a   | Explain the medical context (including whether diagnostic or prognostic) and rationale for developing or validating the multivariable prediction model, including references to existing models. |                                     |                               |
|                           | 3b   | Specify the objectives, including whether the study describes the development or validation of the model or both.                                                                                |                                     |                               |
| <b>Methods</b>            |      |                                                                                                                                                                                                  |                                     |                               |
| Source of data            | 4a   | Describe the study design or source of data (e.g., randomized trial, cohort, or registry data), separately for the development and validation data sets, if applicable.                          |                                     |                               |
|                           | 4b   | Specify the key study dates, including start of accrual; end of accrual; and, if applicable, end of follow-up.                                                                                   |                                     |                               |
| Participants              | 5a   | Specify key elements of the study setting (e.g., primary care, secondary care, general population) including number and location of centres.                                                     |                                     |                               |
|                           | 5b   | Describe eligibility criteria for participants.                                                                                                                                                  |                                     |                               |
|                           | 5c   | Give details of treatments received, if relevant.                                                                                                                                                |                                     |                               |
| Outcome                   | 6a   | Clearly define the outcome that is predicted by the prediction model, including how and when assessed.                                                                                           |                                     |                               |
|                           | 6b   | Report any actions to blind assessment of the outcome to be predicted.                                                                                                                           |                                     |                               |
| Predictors                | 7a   | Clearly define all predictors used in developing or validating the multivariable prediction model, including how and when they were measured.                                                    |                                     |                               |
|                           | 7b   | Report any actions to blind assessment of predictors for the outcome and other predictors.                                                                                                       |                                     |                               |
| Sample size               | 8    | Explain how the study size was arrived at.                                                                                                                                                       |                                     |                               |

|                              |     |                                                                                                                                                                                                       |  |  |
|------------------------------|-----|-------------------------------------------------------------------------------------------------------------------------------------------------------------------------------------------------------|--|--|
| Missing data                 | 9   | Describe how missing data were handled (e.g., complete-case analysis, single imputation, multiple imputation) with details of any imputation method.                                                  |  |  |
| Statistical analysis methods | 10a | Describe how predictors were handled in the analyses.                                                                                                                                                 |  |  |
|                              | 10b | Specify type of model, all model-building procedures (including any predictor selection), and method for internal validation.                                                                         |  |  |
|                              | 10d | Specify all measures used to assess model performance and, if relevant, to compare multiple models.                                                                                                   |  |  |
| Risk groups                  | 11  | Provide details on how risk groups were created, if done.                                                                                                                                             |  |  |
| <b>Results</b>               |     |                                                                                                                                                                                                       |  |  |
| Participants                 | 13a | Describe the flow of participants through the study, including the number of participants with and without the outcome and, if applicable, a summary of the follow-up time. A diagram may be helpful. |  |  |
|                              | 13b | Describe the characteristics of the participants (basic demographics, clinical features, available predictors), including the number of participants with missing data for predictors and outcome.    |  |  |
| Model development            | 14a | Specify the number of participants and outcome events in each analysis.                                                                                                                               |  |  |
|                              | 14b | If done, report the unadjusted association between each candidate predictor and outcome.                                                                                                              |  |  |
| Model specification          | 15a | Present the full prediction model to allow predictions for individuals (i.e., all regression coefficients, and model intercept or baseline survival at a given time point).                           |  |  |
|                              | 15b | Explain how to use the prediction model.                                                                                                                                                              |  |  |
| Model performance            | 16  | Report performance measures (with CIs) for the prediction model.                                                                                                                                      |  |  |
| <b>Discussion</b>            |     |                                                                                                                                                                                                       |  |  |
| Limitations                  | 18  | Discuss any limitations of the study (such as nonrepresentative sample, few events per predictor, missing data).                                                                                      |  |  |
| Interpretation               | 19b | Give an overall interpretation of the results, considering objectives, limitations, and results from similar studies, and other relevant evidence.                                                    |  |  |
| Implications                 | 20  | Discuss the potential clinical use of the model and implications for future research.                                                                                                                 |  |  |
| <b>Other information</b>     |     |                                                                                                                                                                                                       |  |  |
| Supplementary information    | 21  | Provide information about the availability of supplementary resources, such as study protocol, Web calculator, and data sets.                                                                         |  |  |
| Funding                      | 22  | Give the source of funding and the role of the funders for the present study.                                                                                                                         |  |  |

1  
2  
3  
4  
5  
6  
7  
8  
9  
10  
11  
12  
13  
14  
15  
16  
17  
18  
19  
20  
21  
22  
23  
24  
25  
26  
27  
28  
29  
30  
31  
32  
33  
34  
35  
36  
37  
38  
39  
40  
41  
42  
43  
44  
45  
46

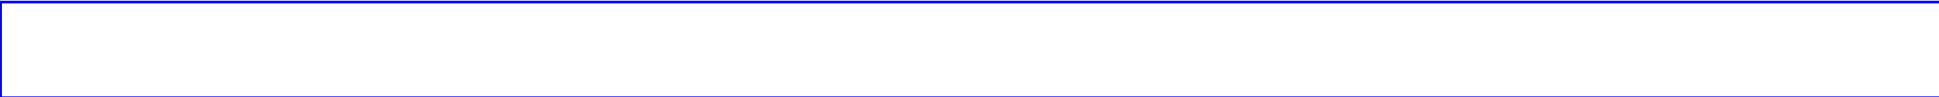

For peer review only

# BMJ Open

## A competing-risks nomogram for predicting cancer-specific death in upper-tract urothelial carcinoma: a population-based analysis

|                                 |                                                                                                                                                                                                                                                                                                                                                                                                                                                                                                                                                                                                                                                                                                                                                                                                                                                                                                                                                                                                                                                                                                                                                                                             |
|---------------------------------|---------------------------------------------------------------------------------------------------------------------------------------------------------------------------------------------------------------------------------------------------------------------------------------------------------------------------------------------------------------------------------------------------------------------------------------------------------------------------------------------------------------------------------------------------------------------------------------------------------------------------------------------------------------------------------------------------------------------------------------------------------------------------------------------------------------------------------------------------------------------------------------------------------------------------------------------------------------------------------------------------------------------------------------------------------------------------------------------------------------------------------------------------------------------------------------------|
| Journal:                        | <i>BMJ Open</i>                                                                                                                                                                                                                                                                                                                                                                                                                                                                                                                                                                                                                                                                                                                                                                                                                                                                                                                                                                                                                                                                                                                                                                             |
| Manuscript ID                   | bmjopen-2020-048243.R2                                                                                                                                                                                                                                                                                                                                                                                                                                                                                                                                                                                                                                                                                                                                                                                                                                                                                                                                                                                                                                                                                                                                                                      |
| Article Type:                   | Original research                                                                                                                                                                                                                                                                                                                                                                                                                                                                                                                                                                                                                                                                                                                                                                                                                                                                                                                                                                                                                                                                                                                                                                           |
| Date Submitted by the Author:   | 12-May-2021                                                                                                                                                                                                                                                                                                                                                                                                                                                                                                                                                                                                                                                                                                                                                                                                                                                                                                                                                                                                                                                                                                                                                                                 |
| Complete List of Authors:       | Li, Chengzhuo; Jinan University First Affiliated Hospital, Department of Clinical Research; Xian Jiaotong University, Department of Clinical Research<br>Han, Didi; Jinan University First Affiliated Hospital, Department of Clinical Research; Xi'an Jiaotong University, Department of Clinical Research<br>Huang, Qiao; Wuhan University Zhongnan Hospital Department of Chemotherapy and Radiation Therapy<br>Xu, Fengshuo; Jinan University First Affiliated Hospital, Department of Clinical Research; Xi'an Jiaotong University, Department of Clinical Research<br>Zheng, Shuai; Jinan University First Affiliated Hospital; Shaanxi University of Chinese Medicine<br>Li, Xiang; Xian Jiaotong University<br>Zhao, Fanfan; Jinan University First Affiliated Hospital, Department of Clinical Research; Xi'an Jiaotong University, Department of Clinical Research<br>Feng, Xiaojie; Jinan University First Affiliated Hospital, Department of Clinical Research; Xi'an Jiaotong University, Department of Clinical Research<br>Lyu, Jun; Jinan University First Affiliated Hospital, Department of Clinical Research; Xi'an Jiaotong University, Department of Clinical Research |
| <b>Primary Subject Heading</b>: | Urology                                                                                                                                                                                                                                                                                                                                                                                                                                                                                                                                                                                                                                                                                                                                                                                                                                                                                                                                                                                                                                                                                                                                                                                     |
| Secondary Subject Heading:      | Public health                                                                                                                                                                                                                                                                                                                                                                                                                                                                                                                                                                                                                                                                                                                                                                                                                                                                                                                                                                                                                                                                                                                                                                               |
| Keywords:                       | EPIDEMIOLOGY, UROLOGY, Urological tumours < UROLOGY                                                                                                                                                                                                                                                                                                                                                                                                                                                                                                                                                                                                                                                                                                                                                                                                                                                                                                                                                                                                                                                                                                                                         |
|                                 |                                                                                                                                                                                                                                                                                                                                                                                                                                                                                                                                                                                                                                                                                                                                                                                                                                                                                                                                                                                                                                                                                                                                                                                             |

SCHOLARONE™  
Manuscripts



I, the Submitting Author has the right to grant and does grant on behalf of all authors of the Work (as defined in the below author licence), an exclusive licence and/or a non-exclusive licence for contributions from authors who are: i) UK Crown employees; ii) where BMJ has agreed a CC-BY licence shall apply, and/or iii) in accordance with the terms applicable for US Federal Government officers or employees acting as part of their official duties; on a worldwide, perpetual, irrevocable, royalty-free basis to BMJ Publishing Group Ltd ("BMJ") its licensees and where the relevant Journal is co-owned by BMJ to the co-owners of the Journal, to publish the Work in this journal and any other BMJ products and to exploit all rights, as set out in our [licence](#).

The Submitting Author accepts and understands that any supply made under these terms is made by BMJ to the Submitting Author unless you are acting as an employee on behalf of your employer or a postgraduate student of an affiliated institution which is paying any applicable article publishing charge ("APC") for Open Access articles. Where the Submitting Author wishes to make the Work available on an Open Access basis (and intends to pay the relevant APC), the terms of reuse of such Open Access shall be governed by a Creative Commons licence – details of these licences and which [Creative Commons](#) licence will apply to this Work are set out in our licence referred to above.

Other than as permitted in any relevant BMJ Author's Self Archiving Policies, I confirm this Work has not been accepted for publication elsewhere, is not being considered for publication elsewhere and does not duplicate material already published. I confirm all authors consent to publication of this Work and authorise the granting of this licence.

1  
2  
3  
4 **A competing-risks nomogram for predicting cancer-specific death in**  
5  
6 **upper-tract urothelial carcinoma: a population-based analysis**  
7  
8

9 Running Head : Nomogram for UTUC cancer-specific death  
10

11 Chengzhuo Li<sup>1,2</sup>, Didi Han<sup>1,2</sup>, Qiao Huang<sup>3</sup>, Fengshuo Xu<sup>1,2</sup>, Shuai Zheng<sup>1,4</sup>, Xiang  
12  
13  
14 Li<sup>5</sup>, Fanfan Zhao<sup>1,2</sup>, Xiaojie Feng<sup>1,2</sup>, and Jun Lyu<sup>1,2\*</sup>  
15

16  
17 \*Correspondence: lyujun2020@jnu.edu.cn  
18

19  
20 <sup>1</sup>Department of Clinical Research, The First Affiliated Hospital of Jinan University,  
21  
22 Guangdong Province, 510630, China  
23

24  
25 <sup>2</sup>School of Public Health, Xi'an Jiaotong University Health Science Center, Shaanxi  
26  
27 Province, 710061, China  
28

29  
30 <sup>3</sup>Center for Evidence-Based and Translational Medicine, Zhongnan Hospital of  
31  
32 Wuhan University, Hubei Province, 430071, China  
33

34  
35 <sup>4</sup>School of Public Health, Shaanxi University of Chinese Medicine, Xi'an 712046,  
36  
37 Shaanxi Province, China  
38

39  
40 <sup>5</sup>School of Mechanical Engineering, Xian Jiaotong University, Shaanxi Province,  
41  
42 710049, China  
43  
44  
45  
46  
47

48 Correspondence to: Jun Lyu.  
49

50  
51 Department of Clinical Research, The First Affiliated Hospital of Jinan University,  
52  
53 613 west huangpu avenue, tianhe district, Guangzhou, Guangdong Province, 510630,  
54  
55 China.  
56

57  
58 **Telephone: +8613922274169; Email: lyujun2020@jnu.edu.cn.**  
59  
60

## Abstract

**Objectives:** The purpose of this study was to use a competing-risks model to establish a nomogram to more accurately analyze the prognostic factors for upper-tract urothelial carcinoma (UTUC) cancer-specific death (CSD).

**Design:** Retrospective observational cohort study.

**Setting:** The program has yielded a database of all cancer patients in 18 defined geographic regions of the United States.

**Participants:** We selected UTUC patients from the latest edition of the Surveillance, Epidemiology, and End Results (SEER) database that covers from 1975 to 2016. After excluding patients with unknown histological grade, tumor size, and lymph node status, we finally selected 2576 patients.

**Primary and secondary outcome measures:** We used the Fine-Gray proportional subdistribution hazards model for a multivariate analysis and compared the results with those obtained using cause-specific hazards model. We finally constructed a nomogram for the 3, 5, and 8 years CSD rates and tested these rates in a validation cohort.

**Results:** The proportional subdistribution hazards model showed that sex, tumor size, distant metastasis, surgery status, number of lymph nodes positive (LNP), and lymph nodes ratio(LNR) were independent prognostic factors for CSD. All significant factors associated with CSD were included in the nomogram. The 3, 5, and 8 years concordance indexes were 0.719, 0.702, and 0.692 in the training cohort, and 0.701, 0.675, and 0.668 in the validation cohort, respectively.



1  
2  
3  
4 **Conclusions:** The competing-risks model showed that sex, tumor size, distant  
5 metastasis, surgery status, LNP and LNR were associated with CSD. The nomogram  
6 predicts the probability of CSD in UTUC patients at 3, 5, and 8 years, which can  
7 improve the ability of clinicians to predict the survival probabilities in individual  
8 patients.  
9  
10  
11  
12  
13  
14  
15

16  
17 **Strengths and limitations of this study:**  
18

- 19  
20 •The study established the first competing risk nomogram for predicting the 3-, 5-,  
21 and 8-year specific mortality probability for UTUC based on a large retrospective  
22 sample, which can improve the ability of clinicians to predict the survival  
23 probabilities in individual patients.  
24  
25 •The established model is not comprehensive enough, because the SEER database  
26 does not include all prognostic factors for UTUC.  
27  
28 •The data available on the treatment status are not sufficiently detailed to distinguish  
29 the impact of various treatment plans.  
30  
31 •The model requires prospective studies to confirm its reliability.  
32  
33  
34  
35  
36  
37  
38  
39  
40  
41  
42

43 **Keywords:** competing risk model, upper-tract urothelial carcinoma(UTUC),  
44 nomogram, SEER, cancer-specific death  
45  
46  
47

48 **Abbreviations:** UTUC: upper-tract urothelial carcinoma; CSD: cancer-specific death;  
49 DOC: death due to other causes; SEER: Surveillance, Epidemiology, and End  
50 Results; LNE: lymph nodes examined; LNP: lymph nodes positive; K-M:  
51 Kaplan-Meier; CIF: cumulative incidence function; ICD-O-3: International  
52 Classification of Diseases for Oncology-3; LNR: lymph nodes ratio; C-index:  
53  
54  
55  
56  
57  
58  
59  
60

1  
2  
3  
4 concordance index; CS: cause-specific hazards model; SD: proportional  
5  
6 subdistribution hazards model  
7  
8

## 9 **Introduction**

10  
11 Urothelial carcinomas are the fourth most common type of tumor,[1] and they can  
12  
13 be located in the upper urinary tract or the lower. Upper-tract urothelial carcinoma  
14  
15 (UTUC), which includes renal pelvis and ureter carcinoma, currently accounts for 5%  
16  
17 of urothelial malignancies. [2] The annual incidence of UTUC is typically estimated  
18  
19 at 1 or 2 per 100,000 inhabitants in Western countries.[3] However, the increasing  
20  
21 morbidity and mortality associated with UTUC[4, 5] are increasing the importance of  
22  
23 this research.  
24  
25  
26  
27  
28  
29

30 A study showed that UTUC has unique prognostic factors, which are different  
31  
32 from bladder cancer and other urinary tract cancers.[6] Most studies analyzing the  
33  
34 prognostic factors for UTUC have adopted the Kaplan-Meier (K-M) method or Cox  
35  
36 regression methods.[7–9] These methods only consider a single endpoint when  
37  
38 determining survival parameters. However, in clinical research, in addition to events  
39  
40 of interest, there are often competing events. Competing events for cancer deaths refer  
41  
42 to death from other causes not related to the primary cancer, such as other diseases,  
43  
44 car collisions, and suicide. In traditional survival analysis, these events will be  
45  
46 considered as censored, which will make the cumulative incidence of cancer deaths  
47  
48 overestimated. Applying standard survival analysis to competing-risks data leads to  
49  
50 false and biased results.[10] Although the use of all-cause death as the study endpoint  
51  
52 does not cause a competing risks bias, such an analysis cannot reflect the influence of  
53  
54  
55  
56  
57  
58  
59  
60

1  
2  
3  
4 factors on the specific endpoint of cancer death. Therefore, the cumulative incidence  
5  
6 function (CIF) of UTUC cancer-specific death (CSD) needs to be calculated and  
7  
8 prognostic factors for UTUC analyzed using the Fine-Gray proportional  
9  
10 subdistribution hazards model.[11]  
11  
12

13  
14 A nomogram is based on a prognostic model and graphically presents the  
15  
16 predictive abilities of different prognostic factors as the lengths of line segments.  
17  
18 This format makes it easy for clinicians to make rapid and comprehensive  
19  
20 judgments and to predict the probability of CSD, which has great clinical  
21  
22 significance. Some studies have constructed competing-risks nomograms for  
23  
24 cancers such as sarcoma and prostate cancer,[12, 13] but research related to UTUC  
25  
26 has been lacking.  
27  
28  
29  
30  
31

32  
33 The purpose of our research was to identify the prognostic factors of UTUC  
34  
35 based on competing risks model and used them to construct a nomogram to predict  
36  
37 the survival rates of patients at the 3, 5, and 8 years.  
38  
39

## 40 **Methods**

### 41 **Database and patients**

42  
43 The Surveillance, Epidemiology, and End Results (SEER) program has yielded a  
44  
45 database of all cancer patients in 18 defined geographic regions of the United States  
46  
47 collected by the National Cancer Institute. It is the largest cancer registry in the  
48  
49 United States and includes information on approximately 28% of the United States  
50  
51 population. Because part of the SEER research data is publicly available, no informed  
52  
53 consent or institutional review board approval is required when analyzing the data.  
54  
55  
56  
57  
58  
59  
60

1  
2  
3  
4 We additionally requested chemotherapy data for inclusion in our research and  
5  
6 obtained a license for using SEER software.[14, 15]  
7  
8

9 We selected UTUC patients from the latest edition of the SEER database that  
10  
11 covers from 1975 to 2016. The primary sites were extracted using the SEER codes of  
12  
13 “C65.9-Renal pelvis” and “C66.9-Ureter.” Patients between 2004 and 2015 were  
14  
15 included in the study. We included all of the histological subtypes of UTUC,  
16  
17 according to the ICD-O-3 (third revision of the International Classification of  
18  
19 Diseases for Oncology).The following demographic indicators were selected: age at  
20  
21 diagnosis, sex, race, and marital status. Primary site, histological grade, tumor size,  
22  
23 laterality, distant metastasis, surgery status, radiotherapy status, chemotherapy status,  
24  
25 number of lymph nodes examined (LNE), lymph nodes positive (LNP), and lymph  
26  
27 nodes ratio (LNR; calculated as the number of LNP divided by LNE) were also  
28  
29 included as pathological characteristics. The tumor size was categorized into three  
30  
31 groups:  $<2$ ,  $2-4$ , and  $\geq 4$  cm.[1, 16] The study outcomes included CSD and death due  
32  
33 to other causes (DOC). The survival time was reported in the available data in  
34  
35 months.  
36  
37  
38  
39  
40  
41  
42  
43  
44

#### 45 **Exclusion criteria**

46  
47 Our preliminary selection of the above methods initially identified 13,581  
48  
49 patients. Then, in order to ensure the accuracy of the study, the exclusion criteria for  
50  
51 the study data are as follows: unknown histological grade, unknown tumor size, and  
52  
53 unknown lymph nodes status. The specific data selection process is shown in  
54  
55 Figure 1. We finally chose 2576 patients for inclusion in follow-up investigations.  
56  
57  
58  
59  
60

Figure 1

## Statistical methods

We randomly divided the 2576 eligible patients into 2 groups using R software (version 3.5.3, The R Foundation for Statistical Computing, Vienna, Austria; <http://www.r-project.org>): 70% (n=1803) in the training cohort and 30% (n=773) in the validation cohort. We first described the basic composition of each factor in the two patient cohorts using R software. The age, LNE, LNP and LNR were expressed as median and interquartile-range values, while categorical variables were represented as percentages. We evaluated differences in patient characteristics between two groups using the Student's t-test and Chi-square test.

We used the cumulative incidence function (CIF) to describe the probability of each event, and also plotted the corresponding CIF curves. And the Gray's test was used for univariate analysis to estimate the difference in CIF between groups. Significant variables ( $P < 0.05$ ) were included in the multivariate regression model. The Fine-Gray proportional subdistribution hazards model was used for the multivariate analysis and compared with the results of cause-specific hazards model. Applying the standard Cox regression method ignores the presence of competing risks and hence overestimates the actual incidence of beneficial events, and so may lead to inappropriate risk stratification.[17] Several studies have confirmed that different approaches can be used in competing-risks settings for multivariate survival analysis, but proportional subdistribution hazards model have been found to be the best method to predict the survival probability.[18-20]

1  
2  
3  
4 Finally, the results of Fine-Gray proportional subdistribution hazards model were  
5  
6 used to construct a nomogram of the 3, 5, and 8 years CSD rates. We used the  
7  
8 concordance index (C-index) and calibration plots to evaluate the differentiation  
9  
10 ability and consistency of the established model in both training and validation  
11  
12 cohorts.  
13  
14  
15

16  
17 All statistical tests were conducted using R software (version 3.5.3). Probability  
18  
19 values of  $P < 0.05$  were considered statistically significant, and all tests were  
20  
21 two-sided. The SEER database can be accessed free of charge, and this study was  
22  
23 exempted from obtaining informed consent.  
24  
25

### 26 27 **Patients and public involvement** 28 29

30 This research was done without patient involvement. Patients were not invited to  
31  
32 comment on the study design and were not consulted to develop patient-relevant  
33  
34 outcomes or interpret the results. Patients were not invited to contribute to the writing  
35  
36 or editing of this document for readability or accuracy.  
37  
38  
39

## 40 **Results** 41 42

### 43 **Patient characteristics** 44 45

46 The composition of each variable for the 2576 patients in the training and  
47  
48 validation cohorts is presented in Table 1. This table indicates that the median age  
49  
50 was 71 years in the training and validation cohorts, respectively. The majority of  
51  
52 patients were male (60.6% and 57.4%), white (86.2% and 82.5%), and married  
53  
54 (86.8% and 87.6%). The main UTUC sites were in the renal pelvis (63.9% and 62.7%,  
55  
56 respectively, in the training and validation cohorts), with the rest in the ureter.  
57  
58  
59  
60

1  
2  
3  
4 Majority of patients were in the undifferentiated stage (58.1% and 55.6%), and most  
5  
6 of the tumors in both cohorts were larger than 4 cm. Most patients in both cohorts had  
7  
8 received surgery, whereas a few patients had received radiotherapy or chemotherapy.  
9  
10  
11 Only about 9% of patients had distant metastasis. The baseline characteristics of the  
12  
13 training cohorts and validation cohorts were basically similar.  
14

15  
16  
17 

|         |
|---------|
| Table 1 |
|---------|

### 18 19 **Univariate analysis**

20  
21  
22 We calculated the 3, 5, and 8 years cumulative incidence rates of CSD and DOC.  
23  
24 Year, laterality, and marital status were not related to either outcome ( $P>0.05$ ), while  
25  
26 age, sex, histological grade, chemotherapy status, and LNR were related to both  
27  
28 outcomes ( $P<0.05$ ). Race, primary site, tumor size, surgery status, radiotherapy status,  
29  
30 distant metastasis, LNE, and LNP were significantly related to CSD. The  
31  
32 corresponding CIF curves are shown in Figure 2. The cumulative incidence of CSD  
33  
34 and DOC are compared in Table 2.  
35  
36  
37  
38  
39

40 

|                   |
|-------------------|
| Figure 2, Table 2 |
|-------------------|

### 41 42 43 44 45 **Multivariate analysis**

46  
47  
48 Our comparison of the proportional subdistribution hazards model with  
49  
50 cancer-specific hazards model yielded the results presented in Table 3. The  
51  
52 cancer-specific hazards model showed that sex, tumor size, distant metastasis, LNP  
53  
54 and LNR were prognostic factors for UTUC ( $P<0.001$ ). We then constructed the  
55  
56 Fine-Gray proportional subdistribution hazards model, which indicated that sex  
57  
58  
59  
60

(hazard ratio [HR]=1.480 for female, 95% confidence interval [CI]=1.241–1.764), tumor size (HR=1.556 for 2–4 cm, 95% CI=1.092–2.216; HR=2.205 for  $\geq 4$  cm, 95% CI=1.575–3.087), surgery status (HR=2.205 for no/unknown surgery, 95% CI=1.292–3.761), distant metastasis (HR=2.414 for distant, 95% CI=1.842–3.163), LNP (HR=1.064, 95% CI=1.022–1.107), and LNR (HR=1.873, 95% CI=1.435–2.445) were prognostic factors affecting UTUC, as presented in Table 3.

Table 3

### Construction and verification of the nomogram

Figure 3 shows the nomogram we constructed according to the results of the Fine-Gray proportional subdistribution hazards model for predicting the CSD probabilities at 3, 5, and 8 years. The figure shows that LNP had the greatest impact on the probability of CSD, followed by distant metastasis, tumor size, LNR, surgery, and sex.

We used both the training and validation cohorts to verify the nomogram after establishing it. The 3, 5, and 8 years C-indexes were 0.719, 0.702, and 0.692 for the training cohort, respectively, and 0.701, 0.675, and 0.668 for the validation cohort. All of these values exceeded 0.6, which indicated that the model had good discrimination ability. We then tested the prediction accuracy of the model. As shown in Figure 4, the 3, 5, and 8 years calibration plots for both cohorts were very close to the standard straight line, demonstrating that the model was well calibrated.

Figures 3, 4



## Discussion

The increasing incidence of UTUC[21] makes it necessary to further explore the prognostic factors for UTUC. The present study used a competing-risks model to more accurately explore the prognostic factors for UTUC, and used these factors to construct a nomogram to provide clinicians with direct guidance when they are making relevant predictions.

The application of study criteria resulted in the inclusion in 2576 patients from the SEER database, and 1542 of these patients died during the follow-up, although only 750 of the deaths were related to UTUC. This meant that the number of DOC patients was almost the same as that for CSD. In this situation, if the traditional K-M or Cox survival analysis had been adopted, the DOC patients will be regarded as censored. This will lead to an overestimation of the cumulative incidence of CSD, which cannot truly reflect the prognosis.[22, 23] We overcame this shortcoming by using competing risks model, which can properly address the situation where the available data are related to multiple potential outcomes.[24] This method was first proposed by Fine and Gray, and has also been applied in some previous studies.[17,25–26] In the case of competing risks, there are usually two models. One is cause-specific hazards model (CS), the other is the proportional subdistribution hazards model (SD), which is also known as the Fine-Gary model. In present study, the two models were analyzed and compared. Because CS is suitable for answering etiological questions, and SD is suitable for establishing clinical prediction models and risk scores. Therefore, we used the CIF and the proportional subdistribution

1  
2  
3  
4 hazards model to explore the impact of various factors on the prognosis of CSD.  
5

6 The univariate analysis results showed that age, sex, race, primary site,  
7 histological grade, tumor size, surgery status, radiotherapy status, chemotherapy  
8 status, distant metastasis, LNE, LNP, and LNR were influencing factors for CSD,  
9 while age, sex, histological grade, chemotherapy status, and LNR were influencing  
10 factors for DOC. The cause-specific hazards model results showed that age, sex,  
11 histological grade, tumor size, distant metastasis, LNP, and LNR were prognostic  
12 factors for CSD. The proportional subdistribution hazards model showed that sex,  
13 tumor size, surgery, distant metastasis, LNP, and LNR are independent prognostic  
14 factors for CSD.  
15  
16  
17  
18  
19  
20  
21  
22  
23  
24  
25  
26  
27  
28  
29

30 Age is generally considered to be a prognostic factor for most cancers, and so is  
31 for UTUC.[27, 28] Our CS model showed that age was a predictor of CSD, however,  
32 it was not statistically significant in the SD model. This may be because of the effect  
33 of age on DOC is higher than the CSD, namely elderly patients are more likely to  
34 death of other causes, which competitively leads to the fact that the incidence of CSD  
35 does not increase significantly with age. Sex and race have always been controversial  
36 prognostic factors. One study showed that race was a preoperative prognostic factors  
37 for UTUC patients.[29] And another study found no statistically significant  
38 differences in survival between males and females.[30] However, the competing-risks  
39 model in our study showed that sex was a risk factor for UTUC, while race was not.  
40 This may be because previous studies ignored the effect of competing risks. However,  
41 since most of the patients included in the SEER database are white, the results  
42  
43  
44  
45  
46  
47  
48  
49  
50  
51  
52  
53  
54  
55  
56  
57  
58  
59  
60

1  
2  
3  
4 regarding race need to be further validated.  
5

6  
7 Tumor size is also generally considered to be related to cancer prognosis. One  
8  
9 study found 5-year recurrence-free survival rates for UTUC patients with tumor sizes  
10  
11 <3 cm and  $\geq 3$  cm of 46.9% and 25.8%, respectively.[31] The univariate and  
12  
13 multivariate analyses performed in the present study also indicated that tumor size  
14  
15 was an influencing factor for CSD, with the prognosis being worse for tumors larger  
16  
17 than 2 cm. In addition, our research also found that distant metastasis was an  
18  
19 important risk factor for CSD. In terms of treatment methods, our study suggested that  
20  
21 surgery status was a significant prognostic factor, which was consistent with the  
22  
23 findings of Yuval et al.[32] In fact, surgery has long been considered the gold  
24  
25 standard of UTUC treatment. However, radiotherapy status, and chemotherapy status  
26  
27 were not influencing factors for CSD in both competing risks models. This conflicted  
28  
29 with some previous findings,[33–35] suggesting that traditional Cox regression  
30  
31 analysis overestimated the effects of radiotherapy and chemotherapy. Of course, the  
32  
33 relative lack of information on the radiotherapy status and chemotherapy status in the  
34  
35 SEER database may also lead to inaccurate results, and so further exploration of these  
36  
37 indicators is needed.  
38  
39  
40  
41  
42  
43  
44  
45  
46  
47

48 Some indicators related to lymph nodes (e.g., distant lymph node metastasis,  
49  
50 LNP, and LNE) have been found to be important clinical information for the  
51  
52 prognosis of cancer, but whether they are independent prognostic factors for UTUC  
53  
54 has not been determined. One study found that lymph node metastases were  
55  
56 significantly associated with reduced cancer-specific survival in univariate  
57  
58  
59  
60

1  
2  
3  
4 analysis.[36] It is worth noting that very few studies have investigated LNP, LNE, and  
5  
6 LNR. Our study is the first to use the SEER database to analyze the prognostic impact  
7  
8 of these indicators on UTUC, and the results may be more accurate than those of  
9  
10 studies involving small samples. LNR is an emerging indicator that has been regarded  
11  
12 as a prognostic factor in rectal cancer and breast cancer.[37, 38] Our results also  
13  
14 suggested that LNR was an important prognostic factor of UTUC. We found that LNE  
15  
16 was an influencing factor for UTUC in the univariate analysis but not in the  
17  
18 multivariate analysis. Moreover, both LNR and LNP entered the proportional  
19  
20 subdistribution hazards model, which showed that after adjusting for the effects of  
21  
22 LNR and LNP, LNE was no longer an independent prognostic indicator. LNP was a  
23  
24 prognostic factor in all of the analyses, indicating that it greatly influences the  
25  
26 prognosis of UTUC.  
27  
28  
29  
30  
31  
32  
33  
34

35 We utilized the results from the above-mentioned proportional subdistribution  
36  
37 hazards model to construct a nomogram that graphically presents the degrees of  
38  
39 influence of various prognostic factors. This nomogram can be used to predict the 3,  
40  
41 5, and 8 years probabilities of CSD in UTUC patients. The predictive function of  
42  
43 nomogram has been used for different types of cancer, and has even been proposed as  
44  
45 a new standard. The nomogram is easy to use. In order to calculate the CSD  
46  
47 probability of a UTUC patient, find the patient's sex (Male or Female) on the sex row,  
48  
49 draw a vertical line on the dot row, and get the sex score value. Repeat the above  
50  
51 steps for tumor size, M stage, surgery, LNP and LNR. Add the score values of each  
52  
53 variable, find the total point on the total point axis, and draw a straight downward line  
54  
55  
56  
57  
58  
59  
60

1  
2  
3  
4 to get the 3, 5 and 8 years CSD probability of the UTUC patient. For example, a  
5  
6 female (30 points), with a tumor size of 1.5cm (0 points), at M1 stage(68 points), had  
7  
8 surgery performed (0 points), LNP equal to 5 (15 points), and LNR equal to 0.8 (45  
9  
10 points), the total score is 158 points, which corresponds to 3, 5, and 8 years CSD  
11  
12 probability of 58%, 64% and 69%, respectively.  
13  
14  
15

16  
17 The C-indexes for the nomogram all exceeded 0.6, demonstrating that the model  
18  
19 provided a good fit to the available data. The prediction calibration curves in Figure 4  
20  
21 were very close to the standard curve, which indicated that the nomogram had good  
22  
23 predictive ability. The results for the validation cohort also showed that the model was  
24  
25 stable. This model can therefore help clinicians to quickly and easily determine the  
26  
27 prognosis of individual patients and provide guidance in their clinical  
28  
29 decision-making. However, the stability of the model needs further verification.  
30  
31  
32  
33

34  
35 Our study used the large sample size and high quality data from SEER database  
36  
37 and competing risks model, which provided a guarantee for the accuracy of our study.  
38  
39 However, inevitably, our research had some limitations. First, the established model is  
40  
41 not comprehensive enough, because the SEER database does not include all  
42  
43 prognostic factors for UTUC. Second, the data available on the treatment status are  
44  
45 not sufficiently detailed to distinguish the impact of various treatment plans. Third, as  
46  
47 an retrospective study, our results may be affected by confounding bias to some  
48  
49 extent, so the conclusion needs to be further verified in future prospective studies.  
50  
51 Fourth, the cause of death in SEER is that according to the death certificate report,  
52  
53 some deaths may have been misclassified, which may also bring information bias to  
54  
55  
56  
57  
58  
59  
60

our study.

## Conclusions

In summary, this study used a competing-risks model to determine the prognostic factors for UTUC. The proportional subdistribution hazards model showed that sex, tumor size, surgery, distant metastasis, LNP, and LNR were associated with CSD, while LNE was not. The constructed nomogram can predict the 3, 5, and 8 years CSD probabilities of patients based on these relevant factors, which can support clinicians to make better judgments of the survival rates of individual patients.

## Acknowledgments

The authors would like to thank two referees and the associate editor for their constructive advice.

## Footnotes

**Contributorship statement:** JL, CZL, and SZ designed the study; QH, DDH, and

FSX collected and analyzed the data; CZL and XL drafted the initial manuscript;

FFZ, and XJF reviewed and edited the article; All authors read and approved the

final manuscript.

**Funding:** The study was supported by The National Social Science Foundation of China (grant no. 16BGL183).

**Competing interests:** The authors declare that they have no competing interests.

**Availability of data and materials:** Ethical approval was waived, and informed consent was unnecessary because the SEER research data are anonymous and publicly available.

**Patient consent for publication:** Not required.

1  
2  
3  
4 **Data availability statement:** The datasets generated and analyzed during the current  
5  
6 study are available from the corresponding author on reasonable request.  
7  
8

9 **Ethics statement:** The data analyses and use of the SEER database in our manuscript  
10  
11 are in accordance with the DUA and do not require institutional review board  
12  
13 approval or other ethics approval or consent of the study subjects.  
14  
15

16 **Licence statement:** Other than as permitted in any relevant BMJ Author's Self  
17  
18 Archiving Policies, I confirm this Work has not been accepted for publication  
19  
20 elsewhere, is not being considered for publication elsewhere and does not duplicate  
21  
22 material already published. I confirm all authors consent to publication of this Work  
23  
24 and authorise the granting of this licence.  
25  
26  
27  
28  
29  
30  
31  
32  
33  
34  
35  
36  
37  
38  
39  
40  
41  
42  
43  
44  
45  
46  
47  
48  
49  
50  
51  
52  
53  
54  
55  
56  
57  
58  
59  
60

## References

1. Roupret M, Babjuk M, Comperat E, Zigeuner R, Sylvester RJ, Burger M, Cowan NC, Gontero P, Van Rhijn BWG, Mostafid AH et al. European association of urology guidelines on upper urinary tract urothelial carcinoma: 2017 update. *Eur Urol*. 2018;73(1):111-22.
2. JJ M, LM E. - upper tract urothelial neoplasms: Incidence and survival during the last 2. D - 0376374. (- 0022-5347 (Print)):- 1523-5.
3. Rouprêt M, Babjuk M, Compérat E, Zigeuner R, Sylvester RJ, Burger M, Cowan NC, Böhle A, Van Rhijn BWG, Kaasinen E et al. European association of urology guidelines on upper urinary tract urothelial cell carcinoma: 2015 update. *European Urology*. 2015;68(5):868-79.
4. Siegel RL, Miller KD, Jemal A. Cancer statistics, 2019. *CA Cancer J Clin*. 2019;69(1):7-34.
5. Raman JD, Messer J, Sielatycki JA, Hollenbeak CS. Incidence and survival of patients with carcinoma of the ureter and renal pelvis in the USA, 1973-2005. *BJU Int*. 2011;107(7):1059-64.
6. Green DA, Rink M, Xylinas E, Matin SF, Stenzl A, Roupret M, Karakiewicz PI, Scherr DS, Shariat SF. Urothelial carcinoma of the bladder and the upper tract: Disparate twins. *Journal of Urology*. 2013;189(4):1214-21.
7. Lughezzani G, Jeldres C, Isbarn H, Shariat SF, Sun M, Pharand D, Widmer H, Arjane P, Graefen M, Montorsi F et al. A critical appraisal of the value of lymph node dissection at nephroureterectomy for upper tract urothelial carcinoma. *Urology*. 2010;75(1):118-24.
8. Novara G, Matsumoto K, Kassouf W, Walton TJ, Fritsche HM, Bastian PJ, Martinez-Salamanca JI, Seitz C, Lemberger RJ, Burger M et al. Prognostic role of lymphovascular invasion in patients with urothelial carcinoma of the upper urinary tract: An international validation study. *Eur Urol*. 2010;57(6):1064-71.
9. Remzi M, Haitel A, Margulis V, Karakiewicz P, Montorsi F, Kikuchi E, Zigeuner R, Weizer A, Bolenz C, Bensalah K et al. Tumour architecture is an independent predictor of outcomes after nephroureterectomy: A multi-institutional analysis of 1363 patients. *BJU Int*. 2009;103(3):307-11.
10. Kim HT. Cumulative incidence in competing risks data and competing risks regression analysis. *Clin Cancer Res*. 2007;13(2 Pt 1):559-65.
11. PC A, JP F. - practical recommendations for reporting fine-gray model analyses for competing. D - 8215016. (- 1097-0258 (Electronic)):- 4391-400.
12. Kattan MW, Heller G, Brennan MF. A competing-risks nomogram for sarcoma-specific death following local recurrence. *Stat Med*. 2003;22(22):3515-25.
13. Abdollah F, Sun M, Schmitges J, Tian Z, Jeldres C, Briganti A, Shariat SF, Perrotte P, Montorsi F, Karakiewicz PI. Cancer-specific and other-cause mortality after radical prostatectomy versus observation in patients with prostate cancer: Competing-risks analysis of a large north american population-based cohort. *Eur Urol*. 2011;60(5):920-30.
14. Surveillance Research Program, National Cancer Institute SEER\*Stat software (seer.cancer.gov/seerstat) version <SEER\*Stat 8.3.6>.
15. Yang J, Liu QQ, Geng H, Tian GX, Zeng XT, Lyu J. SEER database application and data



- 1  
2  
3  
4  
5  
6  
7  
8  
9  
10  
11  
12  
13  
14  
15  
16  
17  
18  
19  
20  
21  
22  
23  
24  
25  
26  
27  
28  
29  
30  
31  
32  
33  
34  
35  
36  
37  
38  
39  
40  
41  
42  
43  
44  
45  
46  
47  
48  
49  
50  
51  
52  
53  
54  
55  
56  
57  
58  
59  
60
- extraction methods and processes. *Chinese Journal of Evidence-Based Cardiovascular Medicine*, 2018,10(07):781-784.
16. Pieras E, Frontera G, Ruiz X, Vicens A, Ozonas M, Pizá P. Concomitant carcinoma in situ and tumour size are prognostic factors for bladder recurrence after nephroureterectomy for upper tract transitional cell carcinoma. *BJU Int.* 2010;106(9):1319–1323.
17. Wolbers M, Koller MT, Wittelman JC, Steyerberg EW. Prognostic models with competing risks: Methods and application to coronary risk prediction. *Epidemiology.* 2009;20(4):555-61.
18. Noordzij M, Leffondre K, van Stralen KJ, Zoccali C, Dekker FW, Jager KJ. When do we need competing risks methods for survival analysis in nephrology? *Nephrology Dialysis Transplantation.* 2013;28(11):2670-7.
19. He, C, Zhang, Y, Cai, Z, Lin, X, Li, S. Overall survival and cancer-specific survival in patients with surgically resected pancreatic head adenocarcinoma: A competing risk nomogram analysis. *J Cancer*, 2018. 9(17): p. 3156-3167.20.
20. Yang, J, Pan, Z, He, Y, Zhao, F, Feng, X, Liu, Q, Lyu, J. Competing-risks model for predicting the prognosis of penile cancer based on the SEER database. *Cancer Med*, 2019. 8(18): p. 7881-7889.
21. Soria F, Shariat SF, Lerner SP, Fritsche H-M, Rink M, Kassouf W, Spiess PE, Lotan Y, Ye D, Fernández MI et al. Epidemiology, diagnosis, preoperative evaluation and prognostic assessment of upper-tract urothelial carcinoma (utuc). *World Journal of Urology.* 2016;35(3):379-87.
22. Ludbrook J, Royle AG. Analysing clinical studies: Principles, practice and pitfalls of kaplan–meier plots. *ANZ Journal of Surgery.* 2008;78(3):204-10.
23. Putter H, Fiocco M, Geskus RB. Tutorial in biostatistics: Competing risks and multi-state models. *Statistics in Medicine.* 2007;26(11):2389-430.
24. Fine JP, Gray RJ. A proportional hazards model for the subdistribution of a competing risk. *Journal of the American Statistical Association.* 1999;94(446):496-509.
25. Kutikov A, Egleston BL, Canter D, Smaldone MC, Wong YN, Uzzo RG. Competing risks of death in patients with localized renal cell carcinoma: A comorbidity based model. *Journal Of Urology.* 2012;188(6):2077-83.
26. Bradshaw PT, Stevens J, Khankari N, Teitelbaum SL, Neugut AI, Gammon MD. Cardiovascular disease mortality among breast cancer survivors. *Epidemiology.* 2016;27(1):6-13.
27. Margulis V, Shariat SF, Matin SF, Kamat AM, Zigeuner R, Kikuchi E, Lotan Y, Weizer A, Raman JD, Wood CG et al. Outcomes of radical nephroureterectomy: A series from the upper tract urothelial carcinoma collaboration. *Cancer.* 2009;115(6):1224-33.
28. Yap SA, Schupp CW, Chamie K, Evans CP, Koppie TM. Effect of age on transitional cell carcinoma of the upper urinary tract: Presentation, treatment, and outcomes. *Urology.* 2011;78(1):87-92.
29. Leow JJ, Orsola A, Chang SL, Bellmunt J. A contemporary review of management and prognostic factors of upper tract urothelial carcinoma. *Cancer Treat Rev.* 2015;41(4):310-9.
30. Lughezzani G, Sun M, Perrotte P, Shariat SF, Jeldres C, Budäus L, Latour M, Widmer H, Duclos A, Bénard F et al. Gender-related differences in patients with stage i to iii upper

- tract urothelial carcinoma: Results from the surveillance, epidemiology, and end results database. *Urology*. 2010;75(2):321-7.
31. Espiritu PN, Sverrisson EF, Sexton WJ, Pow-Sang JM, Poch MA, Dhillon J, Spiess PE. Effect of tumor size on recurrence-free survival of upper tract urothelial carcinoma following surgical resection. *Urol Oncol*. 2014;32(5):619-24.
32. Freifeld, Y., et al., Therapeutic strategies for upper tract urothelial carcinoma. *Expert Rev Anticancer Ther*, 2018. 18(8): p. 765-774.33. T S, RE K, J B, M R, JJ L, SR L, MW V, MA P, N H, AS K et al. - effectiveness of adjuvant chemotherapy after radical nephroureterectomy for. D - 8309333. (- 1527-7755 (Electronic)):- 852-60.
34. Leow JJ, Martin-Doyle W, Fay AP, Choueiri TK, Chang SL, Bellmunt J. A systematic review and meta-analysis of adjuvant and neoadjuvant chemotherapy for upper tract urothelial carcinoma. *European Urology*. 2014;66(3):529-41.
35. Roupret M, Babjuk M, Comperat E, Zigeuner R, Sylvester R, Burger M, Cowan N, Bohle A, Van Rhijn BWG, Kaasinen E et al. European guidelines on upper tract urothelial carcinomas: 2013 update. *European Urology*. 2013;63(6):1059-71.
36. Bolenz C, Fernández MI, Trojan L, Herrmann E, Becker A, Weiss C, Alken P, Ströbel P, Michel MS. Lymphovascular invasion and pathologic tumor stage are significant outcome predictors for patients with upper tract urothelial carcinoma. *Urology*. 2008;72(2):364-9.
37. Jin C, Deng X, Li Y, He W, Yang X, Liu J. Lymph node ratio is an independent prognostic factor for rectal cancer after neoadjuvant therapy: A meta-analysis. *J Evid Based Med*. 2018;11(3):169-75.
38. Vinh-Hung V, Verkooijen HM, Fioretta G, Neyroud-Caspar I, Rapiti E, Vlastos G, Deglise C, Usel M, Lutz JM, Bouchardy C. Lymph node ratio as an alternative to pn staging in node-positive breast cancer. *J Clin Oncol*. 2009;27(7):1062-8.

Table 1 The basic characteristics of the patients in this study.

| Variables                 | Training Cohort      | Validation Cohort    | <i>p</i> |
|---------------------------|----------------------|----------------------|----------|
| Number of Patients, n (%) | 1803(70%)            | 773(30%)             |          |
| Age, Median (IQR)         | 71.00 (64.00, 78.00) | 71.00 (63.00, 78.00) | 0.710    |
| Sex, n (%)                |                      |                      | 0.150    |
| Female                    | 711 (39.4)           | 329 (42.6)           |          |
| Male                      | 1092 (60.6)          | 444 (57.4)           |          |
| Race, n (%)               |                      |                      | 0.045    |
| Black                     | 80 ( 4.4)            | 50 ( 6.5)            |          |
| Other                     | 169 ( 9.4)           | 83 (10.7)            |          |
| White                     | 1554 (86.2)          | 640 (82.8)           |          |
| Marital status, n (%)     |                      |                      | 0.656    |
| Married                   | 1565 (86.8)          | 677 (87.6)           |          |
| Others                    | 67 ( 3.7)            | 31 ( 4.0)            |          |
| Single                    | 171 ( 9.5)           | 65 ( 8.4)            |          |
| Year, n (%)               |                      |                      | 0.813    |
| 2004-2006                 | 346 (19.2)           | 159 (20.6)           |          |
| 2007-2009                 | 439 (24.3)           | 181 (23.4)           |          |
| 2010-2012                 | 479 (26.6)           | 198 (25.6)           |          |
| 2013-2015                 | 539 (29.9)           | 235 (30.4)           |          |
| Site, n (%)               |                      |                      | 0.609    |
| Renal pelvis              | 1152 (63.9)          | 485 (62.7)           |          |
| Ureter                    | 651 (36.1)           | 288 (37.3)           |          |
| Grade, n (%)              |                      |                      | 0.481    |
| Grade I                   | 47 ( 2.6)            | 16 ( 2.1)            |          |
| Grade II                  | 149 ( 8.3)           | 69 ( 8.9)            |          |
| Grade III                 | 559 (31.0)           | 258 (33.4)           |          |
| Grade IV                  | 1048 (58.1)          | 430 (55.6)           |          |
| Size, n (%)               |                      |                      | 0.188    |
| [2,4)                     | 559 (31.0)           | 268 (34.7)           |          |
| <2                        | 262 (14.5)           | 106 (13.7)           |          |
| >=4                       | 982 (54.5)           | 399 (51.6)           |          |
| Laterality, n (%)         |                      |                      | 0.551    |
| Left                      | 995 (55.2)           | 416 (53.8)           |          |
| Right                     | 808 (44.8)           | 357 (46.2)           |          |
| Surgery, n (%)            |                      |                      | 0.203    |
| NO/Unknown                | 9 ( 0.5)             | 8 ( 1.0)             |          |
| Yes                       | 1794 (99.5)          | 765 (99.0)           |          |
| Radiotherapy, n (%)       |                      |                      | 0.931    |
| NO/Unknown                | 1676 (93.0)          | 720 (93.1)           |          |
| Yes                       | 127 ( 7.0)           | 53 ( 6.9)            |          |
| Chemotherapy, n (%)       |                      |                      | 0.938    |

|                           |                   |                   |       |
|---------------------------|-------------------|-------------------|-------|
| NO/Unknown                | 1243 (68.9)       | 531 (68.7)        |       |
| Yes                       | 560 (31.1)        | 242 (31.3)        |       |
| Distant metastasis, n (%) |                   |                   | 0.053 |
| M0                        | 1652 (91.6)       | 689 (89.1)        |       |
| M1                        | 151 ( 8.4)        | 84 (10.9)         |       |
| LNE, Median (IQR)         | 3.00 (1.00, 7.00) | 3.00 (1.00, 7.00) | 0.627 |
| LNP, Median (IQR)         | 0.00 (0.00, 1.00) | 0.00 (0.00, 1.00) | 0.542 |
| LNR, Median (IQR)         | 0.00 (0.00, 0.50) | 0.00 (0.00, 0.33) | 0.546 |

Abbreviations: IQR, interquartile-range; LNE, lymph nodes examined; LNP, lymph nodes positive; LNR, lymph nodes ratio.

For peer review only

Table 2 The cumulative incidences of CSD and DOC among patients with UTUC.

| Variables      | Cancer-specific death (%) |                       |                       |        | Death due to other causes (%) |                       |                       |        |
|----------------|---------------------------|-----------------------|-----------------------|--------|-------------------------------|-----------------------|-----------------------|--------|
|                | 3-Year (95%CI)            | 5-Year (95%CI)        | 8-Year (95%CI)        | P      | 3-Year (95%CI)                | 5-Year (95%CI)        | 8-Year (95%CI)        | P      |
| Age            |                           |                       |                       | <0.001 |                               |                       |                       | <0.001 |
| Sex            |                           |                       |                       | <0.001 |                               |                       |                       | <0.001 |
| Male           | 22.903(22.843-22.964)     | 27.131(27.064-27.197) | 29.457(29.386-29.528) |        | 25.697(25.634-25.760)         | 33.645(33.573-33.717) | 40.755(40.673-40.837) |        |
| Female         | 33.320(33.236-33.405)     | 38.157(38.066-38.247) | 40.339(40.245-40.434) |        | 18.710(18.639-18.780)         | 24.144(24.063-24.225) | 29.031(28.937-29.125) |        |
| Race           |                           |                       |                       | 0.008  |                               |                       |                       | 0.057  |
| White          | 25.881(25.828-25.934)     | 29.921(29.864-29.979) | 31.856(31.796-31.916) |        | 23.502(23.451-23.554)         | 30.839(30.780-30.898) | 37.596(37.528-37.664) |        |
| Black          | 35.688(35.423-35.952)     | 44.479(44.194-44.763) | 48.470(48.178-48.762) |        | 22.782(22.555-23.009)         | 27.889(27.638-28.139) | 30.253(29.987-30.519) |        |
| Other          | 33.577(33.399-33.755)     | 39.945(39.752-40.138) | 43.895(43.688-44.102) |        | 17.728(17.586-17.869)         | 22.120(21.960-22.281) | 25.822(25.642-26.003) |        |
| Marital status |                           |                       |                       | 0.578  |                               |                       |                       | 0.888  |
| Married        | 26.658(26.605-26.711)     | 31.020(30.962-31.077) | 33.378(33.317-33.440) |        | 23.164(23.113-23.215)         | 30.048(29.990-30.106) | 36.490(36.423-36.557) |        |
| Single         | 28.974(28.808-29.140)     | 35.148(34.964-35.331) | 37.145(36.956-37.334) |        | 20.973(20.824-21.122)         | 28.420(28.246-28.593) | 33.095(32.902-33.287) |        |
| Others         | 30.406(30.132-30.681)     | 32.762(32.475-33.048) | 32.762(32.475-33.048) |        | 22.481(22.231-22.730)         | 30.490(30.186-30.794) | 35.083(34.731-35.436) |        |
| Year           |                           |                       |                       | 0.430  |                               |                       |                       | 0.535  |
| 2004-2006      | 27.535(27.424-27.646)     | 31.883(31.767-31.999) | 33.622(33.505-33.739) |        | 24.057(23.951-24.164)         | 32.174(32.058-32.290) | 38.551(38.430-38.672) |        |
| 2007-2009      | 29.665(29.564-29.765)     | 34.035(33.930-34.139) | 36.463(36.356-36.569) |        | 22.606(22.513-22.698)         | 28.351(28.252-28.451) | 34.151(34.045-34.256) |        |
| 2010-2012      | 26.033(25.940-26.126)     | 30.269(30.170-30.368) | —                     |        | 21.838(21.751-21.926)         | 28.813(28.715-28.910) | —                     |        |
| 2013-2015      | 25.678(25.572-25.784)     | —                     | —                     |        | 23.766(23.661-23.871)         | —                     | —                     |        |
| Site           |                           |                       |                       | <0.001 |                               |                       |                       | 0.161  |
| Renal pelvis   | 30.986(30.921-31.051)     | 36.259(36.189-36.329) | 38.503(38.430-38.577) |        | 22.942(22.883-23.001)         | 28.605(28.539-28.672) | 33.500(33.425-33.576) |        |
| Ureter         | 19.946(19.870-20.021)     | 23.033(22.951-23.114) | 25.368(25.279-25.456) |        | 22.948(22.868-23.028)         | 32.131(32.037-32.225) | 40.713(40.604-40.822) |        |
| Grade          |                           |                       |                       | <0.001 |                               |                       |                       | 0.043  |
| Well           | 13.707(13.463-13.950)     | 13.707(13.463-13.950) | 13.707(13.463-13.950) |        | 18.635(18.356-18.914)         | 21.710(21.406-22.015) | 40.163(39.717-40.609) |        |

|    |                    |                       |                       |                       |                       |                       |                       |   |        |
|----|--------------------|-----------------------|-----------------------|-----------------------|-----------------------|-----------------------|-----------------------|---|--------|
| 1  |                    |                       |                       |                       |                       |                       |                       |   |        |
| 2  |                    |                       |                       |                       |                       |                       |                       |   |        |
| 3  |                    |                       |                       |                       |                       |                       |                       |   |        |
| 4  |                    |                       |                       |                       |                       |                       |                       |   |        |
| 5  | Moderate           | 10.664(10.543-10.785) | 13.393(13.255-13.530) | 15.852(15.696-16.008) | 10.147(10.028-10.267) | 18.691(18.530-18.853) | 27.546(27.340-27.752) |   |        |
| 6  | Poor               | 30.407(30.315-30.498) | 35.156(35.059-35.253) | 37.336(37.236-37.437) | 24.420(24.335-24.506) | 30.727(30.633-30.822) | 36.164(36.060-36.269) |   |        |
| 7  | Undifferential     | 28.133(28.066-28.200) | 33.013(32.939-33.086) | 35.492(35.413-35.572) | 24.207(24.142-24.271) | 31.584(31.510-31.658) | 37.338(37.252-37.424) |   |        |
| 8  |                    |                       |                       |                       |                       |                       |                       |   |        |
| 9  | Size               |                       |                       |                       | <0.001                |                       |                       |   | 0.733  |
| 10 | <2                 | 11.702(11.603-11.801) | 15.012(14.896-15.129) | 18.912(18.770-19.054) | 23.698(23.568-23.828) | 30.965(30.815-31.114) | 41.203(41.019-41.386) |   |        |
| 11 | [2,4)              | 20.339(20.257-20.421) | 25.952(25.859-26.046) | 27.404(27.307-27.501) | 21.685(21.601-21.769) | 29.655(29.556-29.754) | 38.855(38.736-38.974) |   |        |
| 12 | ≥4                 | 34.800(34.728-34.872) | 38.868(38.792-38.944) | 41.162(41.083-41.242) | 23.457(23.393-23.521) | 29.773(29.701-29.845) | 33.440(33.361-33.519) |   |        |
| 13 |                    |                       |                       |                       |                       |                       |                       |   |        |
| 14 | Laterality         |                       |                       |                       | 0.944                 |                       |                       |   | 0.393  |
| 15 | Left               | 26.970(26.903-27.037) | 31.835(31.762-31.908) | 33.636(33.560-33.713) | 22.586(22.523-22.650) | 29.551(29.479-29.624) | 35.006(34.923-35.089) |   |        |
| 16 | Right              | 27.092(27.017-27.167) | 31.010(30.929-31.091) | 33.867(33.781-33.954) | 23.335(23.264-23.406) | 30.305(30.223-30.387) | 37.564(37.469-37.659) |   |        |
| 17 |                    |                       |                       |                       |                       |                       |                       |   |        |
| 18 | Surgery            |                       |                       |                       | 0.001                 |                       |                       |   | 0.980  |
| 19 | Yes                | 26.715(26.665-26.765) | 31.206(31.152-31.260) | 33.490(33.432-33.547) | 22.940(22.893-22.988) | 29.950(29.895-30.004) | 36.234(36.171-36.296) |   |        |
| 20 | NO/Unknown         | 77.778(76.910-78.646) | —                     | —                     | 22.222(21.522-22.923) | —                     | —                     |   |        |
| 21 |                    |                       |                       |                       |                       |                       |                       |   |        |
| 22 | Radiotherapy       |                       |                       |                       | <0.001                |                       |                       |   | 0.910  |
| 23 | Yes                | 44.203(43.994-44.413) | 50.407(50.191-50.623) | 51.767(51.548-51.986) | 25.971(25.788-26.155) | 32.016(31.816-32.217) | 34.632(34.422-34.842) |   |        |
| 24 | NO/Unknown         | 25.670(25.619-25.721) | 29.951(29.896-30.007) | 32.292(32.233-32.351) | 22.699(22.650-22.748) | 29.733(29.677-29.789) | 36.285(36.220-36.350) |   |        |
| 25 |                    |                       |                       |                       |                       |                       |                       |   |        |
| 26 | Chemotherapy       |                       |                       |                       | <0.001                |                       |                       |   | 0.003  |
| 27 | Yes                | 36.276(36.177-36.375) | 41.751(41.646-41.857) | 43.283(43.175-43.391) | 20.156(20.074-20.239) | 26.807(26.711-26.903) | 30.702(30.598-30.807) |   |        |
| 28 | NO/Unknown         | 22.979(22.922-23.035) | 27.032(26.970-27.094) | 29.614(29.547-29.681) | 24.177(24.119-24.235) | 31.278(31.212-31.344) | 38.534(38.457-38.611) |   |        |
| 29 |                    |                       |                       |                       |                       |                       |                       |   |        |
| 30 | Distant metastasis |                       |                       |                       | <0.001                |                       |                       |   | 0.641  |
| 31 | No                 | 23.438(23.388-23.488) | 28.067(28.012-28.122) | 30.550(30.491-30.609) | 22.674(22.624-22.723) | 29.966(29.909-30.024) | 36.800(36.734-36.866) |   |        |
| 32 | Yes                | 65.586(65.407-65.765) | 67.967(67.789-68.144) | 67.967(67.789-68.144) | 25.548(25.384-25.713) | 28.750(28.577-28.922) | 28.750(28.577-28.922) |   |        |
| 33 |                    |                       |                       |                       |                       |                       |                       |   |        |
| 34 | LNE                | —                     | —                     | —                     | <0.001                | —                     | —                     | — | 0.941  |
| 35 | LNP                | —                     | —                     | —                     | <0.001                | —                     | —                     | — | 0.448  |
| 36 | LNR                | —                     | —                     | —                     | <0.001                | —                     | —                     | — | <0.001 |
| 37 |                    |                       |                       |                       |                       |                       |                       |   |        |
| 38 |                    |                       |                       |                       |                       |                       |                       |   |        |
| 39 |                    |                       |                       |                       |                       |                       |                       |   |        |
| 40 |                    |                       |                       |                       |                       |                       |                       |   |        |
| 41 |                    |                       |                       |                       |                       |                       |                       |   |        |
| 42 |                    |                       |                       |                       |                       |                       |                       |   |        |
| 43 |                    |                       |                       |                       |                       |                       |                       |   |        |
| 44 |                    |                       |                       |                       |                       |                       |                       |   |        |
| 45 |                    |                       |                       |                       |                       |                       |                       |   |        |
| 46 |                    |                       |                       |                       |                       |                       |                       |   |        |

1  
2  
3  
4  
5  
6 Abbreviations: CSD, cancer-specific death; DOC, death due to other causes; UTUC, upper-tract urothelial carcinoma; CI, confidence interval;  
7 LNE, lymph nodes examined; LNP, lymph nodes positive; LNR, lymph nodes ratio.  
8  
9  
10  
11  
12  
13  
14  
15  
16  
17  
18  
19  
20  
21  
22  
23  
24  
25  
26  
27  
28  
29  
30  
31  
32  
33  
34  
35  
36  
37  
38  
39  
40  
41  
42  
43  
44  
45  
46

For peer review only

Table 3 Multivariate analysis by proportional subdistribution hazard model and cause-specific hazards model for CSD among patients with UTUC.

| Variables      | Proportional subdistribution hazards model |       |             |          | Cause-specific hazards model |       |             |          |
|----------------|--------------------------------------------|-------|-------------|----------|------------------------------|-------|-------------|----------|
|                | Coefficient                                | sdHR  | 95%CI       | <i>P</i> | Coefficient                  | csHR  | 95%CI       | <i>P</i> |
| Age            | -0.004                                     | 0.996 | 0.987-1.005 | 0.340    | 0.009                        | 1.009 | 1.000-1.018 | 0.039    |
| Sex            |                                            |       |             |          |                              |       |             |          |
| Male           | Reference                                  |       |             |          | Reference                    |       |             |          |
| Female         | 0.392                                      | 1.480 | 1.241-1.764 | <0.001   | 0.301                        | 1.351 | 1.134-1.611 | <0.001   |
| Race           |                                            |       |             |          |                              |       |             |          |
| White          | Reference                                  |       |             |          | Reference                    |       |             |          |
| Black          | 0.242                                      | 1.274 | 0.873-1.858 | 0.210    | 0.348                        | 1.416 | 0.990-2.027 | 0.057    |
| Other          | 0.201                                      | 1.223 | 0.930-1.607 | 0.150    | 0.164                        | 1.178 | 0.899-1.544 | 0.235    |
| Site           |                                            |       |             |          |                              |       |             |          |
| Renal pelvis   | Reference                                  |       |             |          | Reference                    |       |             |          |
| Ureter         | -0.110                                     | 0.895 | 0.734-1.092 | 0.280    | -0.106                       | 0.899 | 0.732-1.105 | 0.313    |
| Grade          |                                            |       |             |          |                              |       |             |          |
| Well           | Reference                                  |       |             |          | Reference                    |       |             |          |
| Moderate       | -0.034                                     | 0.966 | 0.398-2.343 | 0.940    | 0.009                        | 1.009 | 0.407-2.502 | 0.985    |
| Poor           | 0.763                                      | 2.145 | 0.971-4.739 | 0.059    | 0.908                        | 2.479 | 1.097-5.601 | 0.029    |
| Undifferential | 0.658                                      | 1.931 | 0.878-4.245 | 0.100    | 0.772                        | 2.165 | 0.961-4.875 | 0.062    |
| Size           |                                            |       |             |          |                              |       |             |          |
| <2             | Reference                                  |       |             |          | Reference                    |       |             |          |
| [2,4)          | 0.442                                      | 1.556 | 1.092-2.216 | 0.014    | 0.414                        | 1.513 | 1.043-2.196 | 0.029    |
| ≥4             | 0.791                                      | 2.205 | 1.575-3.087 | <0.001   | 0.881                        | 2.414 | 1.691-3.447 | <0.001   |
| Surgery        |                                            |       |             |          |                              |       |             |          |
| Yes            | Reference                                  |       |             |          | Reference                    |       |             |          |
| NO/Unknown     | 0.791                                      | 2.205 | 1.292-3.761 | 0.004    | 0.752                        | 2.120 | 0.990-4.539 | 0.053    |
| Radiotherapy   |                                            |       |             |          |                              |       |             |          |



|    |              |           |       |             |        |           |      |            |       |
|----|--------------|-----------|-------|-------------|--------|-----------|------|------------|-------|
| 1  |              |           |       |             |        |           |      |            |       |
| 2  |              |           |       |             |        |           |      |            |       |
| 3  |              |           |       |             |        |           |      |            |       |
| 4  | Yes          | Reference |       |             |        | Reference |      |            |       |
| 5  | NO/Unknown   | -0.219    | 0.803 | 0.594-1.087 | 0.160  | -0.240    | 0.78 | 0.595-1.04 | 0.092 |
| 6  |              |           |       |             |        |           | 7    | 0          |       |
| 7  |              |           |       |             |        |           |      |            |       |
| 8  | Chemotherapy |           |       |             |        |           |      |            |       |
| 9  | Yes          | Reference |       |             |        | Reference |      |            |       |
| 10 | NO/Unknown   | 0.025     | 1.025 | 0.829-1.269 | 0.820  | 0.171     | 1.18 | 0.972-1.45 | 0.093 |
| 11 |              |           |       |             |        |           | 7    | 0          |       |
| 12 |              |           |       |             |        |           |      |            |       |
| 13 | Distant      |           |       |             |        |           |      |            |       |
| 14 | metastasis   |           |       |             |        |           |      |            |       |
| 15 | No           | Reference |       |             |        | Reference |      |            |       |
| 16 | Yes          | 0.881     | 2.414 | 1.842-3.163 | <0.001 | 1.252     | 3.49 | 2.741-4.46 | <0.00 |
| 17 |              |           |       |             |        |           | 7    | 0          | 1     |
| 18 | LNE          | -0.012    | 0.988 | 0.971-1.006 | 0.200  | -0.013    | 0.98 | 0.972-1.00 | 0.091 |
| 19 |              |           |       |             |        |           | 7    | 2          |       |
| 20 | LNP          | 0.062     | 1.064 | 1.022-1.107 | 0.002  | 0.069     | 1.07 | 1.032-1.11 | <0.00 |
| 21 |              |           |       |             |        |           | 2    | 3          | 1     |
| 22 | LNR          | 0.627     | 1.873 | 1.435-2.445 | <0.001 | 0.934     | 2.54 | 1.965-3.29 | <0.00 |
| 23 |              |           |       |             |        |           | 4    | 4          | 1     |
| 24 |              |           |       |             |        |           |      |            |       |
| 25 |              |           |       |             |        |           |      |            |       |
| 26 |              |           |       |             |        |           |      |            |       |
| 27 |              |           |       |             |        |           |      |            |       |

Abbreviations: CSD, cancer-specific death; UTUC, upper-tract urothelial carcinoma; sdHR, subdistribution hazard ratio; csHR, Cause-specific hazard ratio; LNE, lymph nodes examined; LNP, lymph nodes positive; LNR, lymph nodes ratio.

## Figure legends

**Figure 1.** Data selection flowchart.

**Figure 2.** The CIF curves of CSD and DOC among UTUC patients.

Abbreviations: CIF, cumulative incidence function; CSD, cancer-specific death;

DOC: death due to other causes; UTUC, upper-tract urothelial carcinoma.

**Figure 3.** Nomogram based on the competing risk analysis to predict CSD probabilities at 3, 5, and 8 years for UTUC patients.

Abbreviations: CSD, cancer-specific death; UTUC, upper-tract urothelial carcinoma;

LNE: lymph nodes examined; LNP: lymph nodes positive.

**Figure 4.** Calibration curves. Calibration curves for 3, 5, and 8 years of the training (A, B, C) and validation (D, E, F) cohorts.

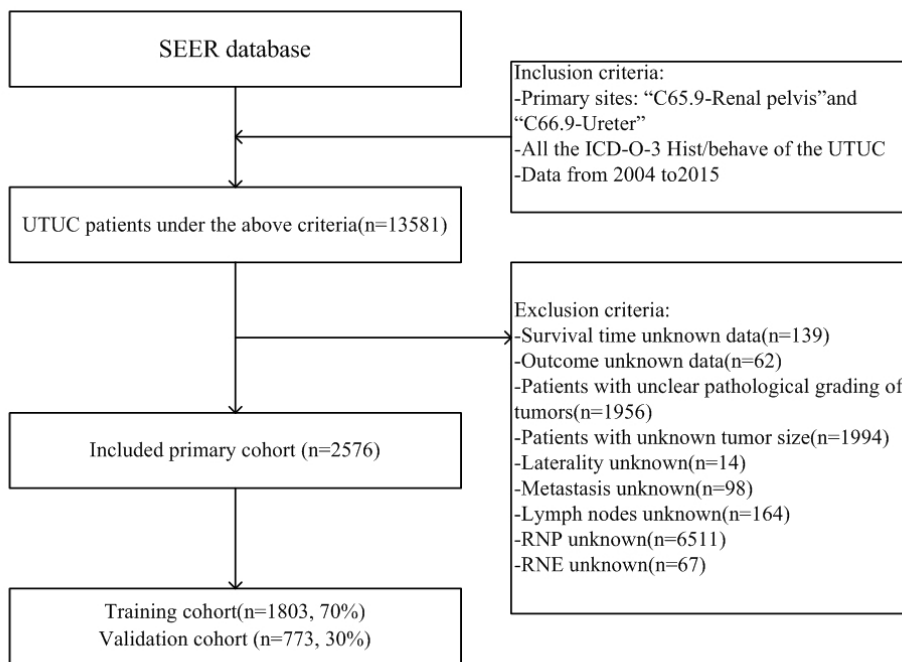

Figure 1. Data selection flowchart.

210x159mm (120 x 120 DPI)

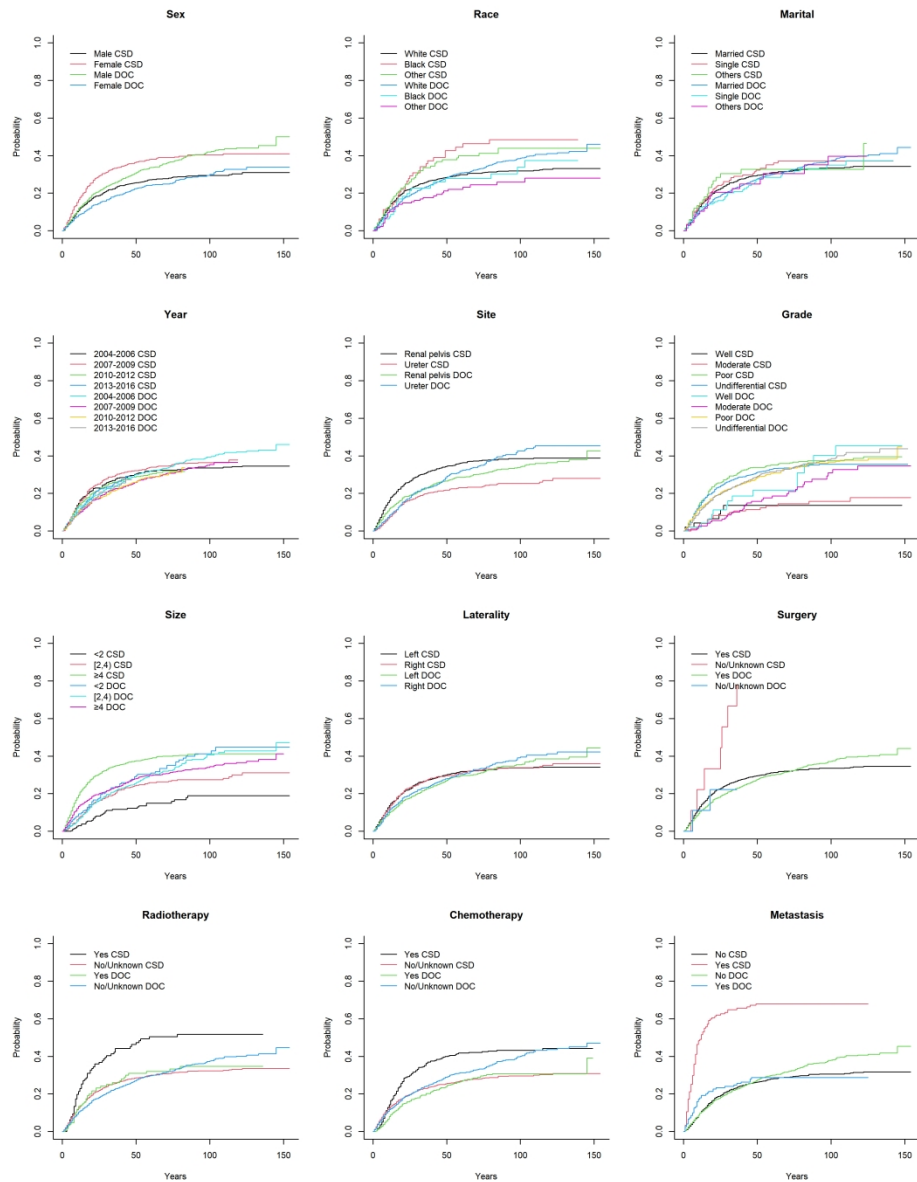

Figure 2. The CIF curves of CSD and DOC among UTUC patients.  
 Abbreviations: CIF, cumulative incidence function; CSD, cancer-specific death; DOC: death due to other causes; UTUC, upper-tract urothelial carcinoma.

296x381mm (300 x 300 DPI)

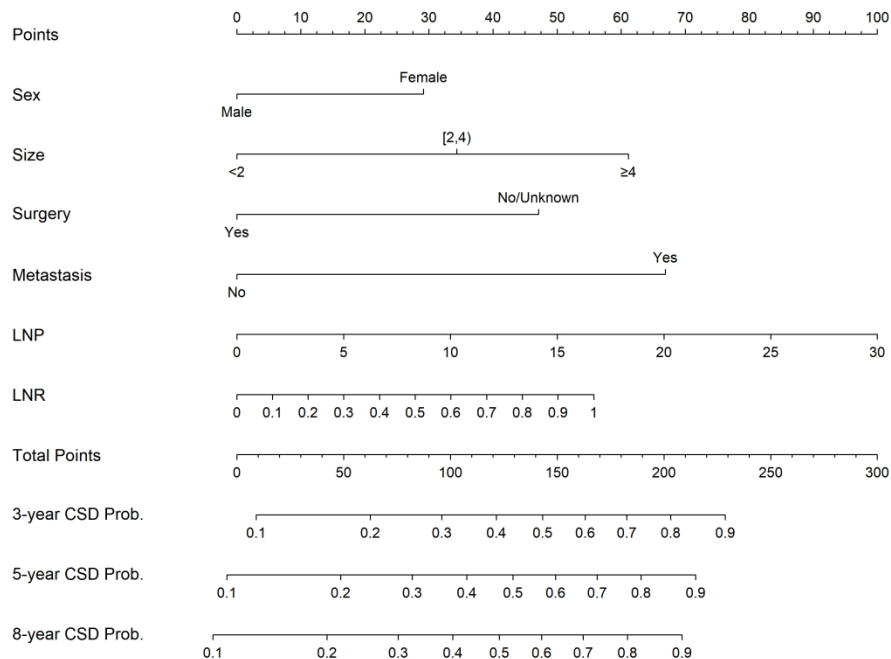

Figure 3. Nomogram based on the competing risk analysis to predict CSD probabilities at 3, 5, and 8 years for UTUC patients.

Abbreviations: CSD, cancer-specific death; UTUC, upper-tract urothelial carcinoma; LNE: lymph nodes examined; LNP: lymph nodes positive.

254x211mm (300 x 300 DPI)

1  
2  
3  
4  
5  
6  
7  
8  
9  
10  
11  
12  
13  
14  
15  
16  
17  
18  
19  
20  
21  
22  
23  
24  
25  
26  
27  
28  
29  
30  
31  
32  
33  
34  
35  
36  
37  
38  
39  
40  
41  
42  
43  
44  
45  
46  
47  
48  
49  
50  
51  
52  
53  
54  
55  
56  
57  
58  
59  
60

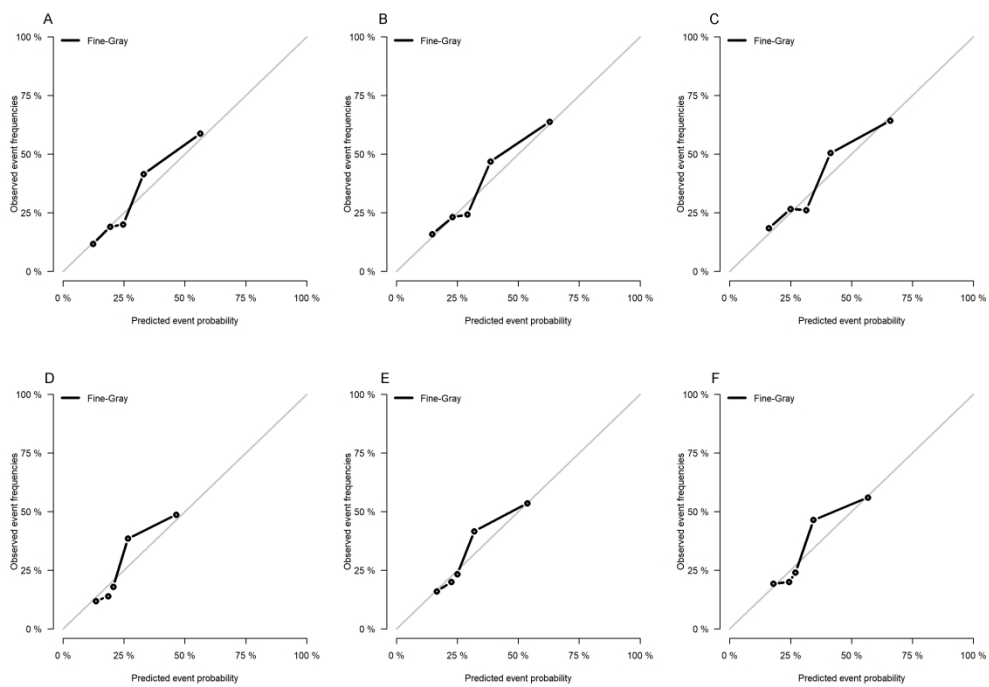

Figure 4. Calibration curves. Calibration curves for 3, 5, and 8 years of the training (A, B, C) and validation (D, E, F) cohorts.

296x211mm (300 x 300 DPI)

## TRIPOD Checklist: Prediction Model Development

| Section                   | Item | Checklist description                                                                                                                                                                            | Reported on Page Number/Line Number | Reported on Section/Paragraph |
|---------------------------|------|--------------------------------------------------------------------------------------------------------------------------------------------------------------------------------------------------|-------------------------------------|-------------------------------|
| <b>Title and abstract</b> |      |                                                                                                                                                                                                  |                                     |                               |
| Title                     | 1    | Identify the study as developing and/or validating a multivariable prediction model, the target population, and the outcome to be predicted.                                                     |                                     |                               |
| Abstract                  | 2    | Provide a summary of objectives, study design, setting, participants, sample size, predictors, outcome, statistical analysis, results, and conclusions.                                          |                                     |                               |
| <b>Introduction</b>       |      |                                                                                                                                                                                                  |                                     |                               |
| Background and objectives | 3a   | Explain the medical context (including whether diagnostic or prognostic) and rationale for developing or validating the multivariable prediction model, including references to existing models. |                                     |                               |
|                           | 3b   | Specify the objectives, including whether the study describes the development or validation of the model or both.                                                                                |                                     |                               |
| <b>Methods</b>            |      |                                                                                                                                                                                                  |                                     |                               |
| Source of data            | 4a   | Describe the study design or source of data (e.g., randomized trial, cohort, or registry data), separately for the development and validation data sets, if applicable.                          |                                     |                               |
|                           | 4b   | Specify the key study dates, including start of accrual; end of accrual; and, if applicable, end of follow-up.                                                                                   |                                     |                               |
| Participants              | 5a   | Specify key elements of the study setting (e.g., primary care, secondary care, general population) including number and location of centres.                                                     |                                     |                               |
|                           | 5b   | Describe eligibility criteria for participants.                                                                                                                                                  |                                     |                               |
|                           | 5c   | Give details of treatments received, if relevant.                                                                                                                                                |                                     |                               |
| Outcome                   | 6a   | Clearly define the outcome that is predicted by the prediction model, including how and when assessed.                                                                                           |                                     |                               |
|                           | 6b   | Report any actions to blind assessment of the outcome to be predicted.                                                                                                                           |                                     |                               |
| Predictors                | 7a   | Clearly define all predictors used in developing or validating the multivariable prediction model, including how and when they were measured.                                                    |                                     |                               |
|                           | 7b   | Report any actions to blind assessment of predictors for the outcome and other predictors.                                                                                                       |                                     |                               |
| Sample size               | 8    | Explain how the study size was arrived at.                                                                                                                                                       |                                     |                               |

|                              |     |                                                                                                                                                                                                       |  |  |
|------------------------------|-----|-------------------------------------------------------------------------------------------------------------------------------------------------------------------------------------------------------|--|--|
| Missing data                 | 9   | Describe how missing data were handled (e.g., complete-case analysis, single imputation, multiple imputation) with details of any imputation method.                                                  |  |  |
| Statistical analysis methods | 10a | Describe how predictors were handled in the analyses.                                                                                                                                                 |  |  |
|                              | 10b | Specify type of model, all model-building procedures (including any predictor selection), and method for internal validation.                                                                         |  |  |
|                              | 10d | Specify all measures used to assess model performance and, if relevant, to compare multiple models.                                                                                                   |  |  |
| Risk groups                  | 11  | Provide details on how risk groups were created, if done.                                                                                                                                             |  |  |
| <b>Results</b>               |     |                                                                                                                                                                                                       |  |  |
| Participants                 | 13a | Describe the flow of participants through the study, including the number of participants with and without the outcome and, if applicable, a summary of the follow-up time. A diagram may be helpful. |  |  |
|                              | 13b | Describe the characteristics of the participants (basic demographics, clinical features, available predictors), including the number of participants with missing data for predictors and outcome.    |  |  |
| Model development            | 14a | Specify the number of participants and outcome events in each analysis.                                                                                                                               |  |  |
|                              | 14b | If done, report the unadjusted association between each candidate predictor and outcome.                                                                                                              |  |  |
| Model specification          | 15a | Present the full prediction model to allow predictions for individuals (i.e., all regression coefficients, and model intercept or baseline survival at a given time point).                           |  |  |
|                              | 15b | Explain how to use the prediction model.                                                                                                                                                              |  |  |
| Model performance            | 16  | Report performance measures (with CIs) for the prediction model.                                                                                                                                      |  |  |
| <b>Discussion</b>            |     |                                                                                                                                                                                                       |  |  |
| Limitations                  | 18  | Discuss any limitations of the study (such as nonrepresentative sample, few events per predictor, missing data).                                                                                      |  |  |
| Interpretation               | 19b | Give an overall interpretation of the results, considering objectives, limitations, and results from similar studies, and other relevant evidence.                                                    |  |  |
| Implications                 | 20  | Discuss the potential clinical use of the model and implications for future research.                                                                                                                 |  |  |
| <b>Other information</b>     |     |                                                                                                                                                                                                       |  |  |
| Supplementary information    | 21  | Provide information about the availability of supplementary resources, such as study protocol, Web calculator, and data sets.                                                                         |  |  |
| Funding                      | 22  | Give the source of funding and the role of the funders for the present study.                                                                                                                         |  |  |



1  
2  
3  
4  
5  
6  
7  
8  
9  
10  
11  
12  
13  
14  
15  
16  
17  
18  
19  
20  
21  
22  
23  
24  
25  
26  
27  
28  
29  
30  
31  
32  
33  
34  
35  
36  
37  
38  
39  
40  
41  
42  
43  
44  
45  
46

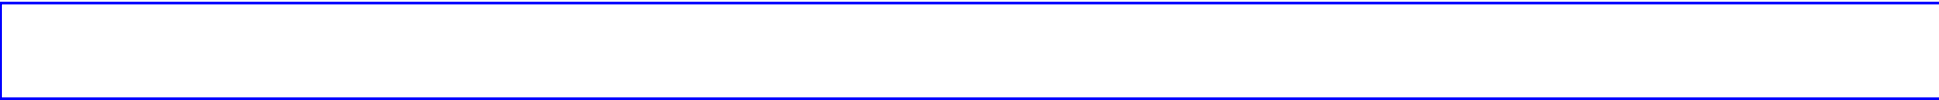

For peer review only

# BMJ Open

## A competing-risks nomogram for predicting cancer-specific death in upper-tract urothelial carcinoma: a population-based analysis

|                                 |                                                                                                                                                                                                                                                                                                                                                                                                                                                                                                                                                                                                                                                                                                                                                                                                                                                                                                                                                                                                                                                                                                                                                                                             |
|---------------------------------|---------------------------------------------------------------------------------------------------------------------------------------------------------------------------------------------------------------------------------------------------------------------------------------------------------------------------------------------------------------------------------------------------------------------------------------------------------------------------------------------------------------------------------------------------------------------------------------------------------------------------------------------------------------------------------------------------------------------------------------------------------------------------------------------------------------------------------------------------------------------------------------------------------------------------------------------------------------------------------------------------------------------------------------------------------------------------------------------------------------------------------------------------------------------------------------------|
| Journal:                        | <i>BMJ Open</i>                                                                                                                                                                                                                                                                                                                                                                                                                                                                                                                                                                                                                                                                                                                                                                                                                                                                                                                                                                                                                                                                                                                                                                             |
| Manuscript ID                   | bmjopen-2020-048243.R3                                                                                                                                                                                                                                                                                                                                                                                                                                                                                                                                                                                                                                                                                                                                                                                                                                                                                                                                                                                                                                                                                                                                                                      |
| Article Type:                   | Original research                                                                                                                                                                                                                                                                                                                                                                                                                                                                                                                                                                                                                                                                                                                                                                                                                                                                                                                                                                                                                                                                                                                                                                           |
| Date Submitted by the Author:   | 07-Jun-2021                                                                                                                                                                                                                                                                                                                                                                                                                                                                                                                                                                                                                                                                                                                                                                                                                                                                                                                                                                                                                                                                                                                                                                                 |
| Complete List of Authors:       | Li, Chengzhuo; Jinan University First Affiliated Hospital, Department of Clinical Research; Xian Jiaotong University, Department of Clinical Research<br>Han, Didi; Jinan University First Affiliated Hospital, Department of Clinical Research; Xi'an Jiaotong University, Department of Clinical Research<br>Huang, Qiao; Wuhan University Zhongnan Hospital Department of Chemotherapy and Radiation Therapy<br>Xu, Fengshuo; Jinan University First Affiliated Hospital, Department of Clinical Research; Xi'an Jiaotong University, Department of Clinical Research<br>Zheng, Shuai; Jinan University First Affiliated Hospital; Shaanxi University of Chinese Medicine<br>Li, Xiang; Xian Jiaotong University<br>Zhao, Fanfan; Jinan University First Affiliated Hospital, Department of Clinical Research; Xi'an Jiaotong University, Department of Clinical Research<br>Feng, Xiaojie; Jinan University First Affiliated Hospital, Department of Clinical Research; Xi'an Jiaotong University, Department of Clinical Research<br>Lyu, Jun; Jinan University First Affiliated Hospital, Department of Clinical Research; Xi'an Jiaotong University, Department of Clinical Research |
| <b>Primary Subject Heading</b>: | Urology                                                                                                                                                                                                                                                                                                                                                                                                                                                                                                                                                                                                                                                                                                                                                                                                                                                                                                                                                                                                                                                                                                                                                                                     |
| Secondary Subject Heading:      | Public health                                                                                                                                                                                                                                                                                                                                                                                                                                                                                                                                                                                                                                                                                                                                                                                                                                                                                                                                                                                                                                                                                                                                                                               |
| Keywords:                       | EPIDEMIOLOGY, UROLOGY, Urological tumours < UROLOGY                                                                                                                                                                                                                                                                                                                                                                                                                                                                                                                                                                                                                                                                                                                                                                                                                                                                                                                                                                                                                                                                                                                                         |
|                                 |                                                                                                                                                                                                                                                                                                                                                                                                                                                                                                                                                                                                                                                                                                                                                                                                                                                                                                                                                                                                                                                                                                                                                                                             |

SCHOLARONE™  
Manuscripts



I, the Submitting Author has the right to grant and does grant on behalf of all authors of the Work (as defined in the below author licence), an exclusive licence and/or a non-exclusive licence for contributions from authors who are: i) UK Crown employees; ii) where BMJ has agreed a CC-BY licence shall apply, and/or iii) in accordance with the terms applicable for US Federal Government officers or employees acting as part of their official duties; on a worldwide, perpetual, irrevocable, royalty-free basis to BMJ Publishing Group Ltd ("BMJ") its licensees and where the relevant Journal is co-owned by BMJ to the co-owners of the Journal, to publish the Work in this journal and any other BMJ products and to exploit all rights, as set out in our [licence](#).

The Submitting Author accepts and understands that any supply made under these terms is made by BMJ to the Submitting Author unless you are acting as an employee on behalf of your employer or a postgraduate student of an affiliated institution which is paying any applicable article publishing charge ("APC") for Open Access articles. Where the Submitting Author wishes to make the Work available on an Open Access basis (and intends to pay the relevant APC), the terms of reuse of such Open Access shall be governed by a Creative Commons licence – details of these licences and which [Creative Commons](#) licence will apply to this Work are set out in our licence referred to above.

Other than as permitted in any relevant BMJ Author's Self Archiving Policies, I confirm this Work has not been accepted for publication elsewhere, is not being considered for publication elsewhere and does not duplicate material already published. I confirm all authors consent to publication of this Work and authorise the granting of this licence.

1  
2  
3  
4 **A competing-risks nomogram for predicting cancer-specific death in**  
5  
6 **upper-tract urothelial carcinoma: a population-based analysis**  
7  
8

9 Running Head : Nomogram for UTUC cancer-specific death  
10

11 Chengzhuo Li<sup>1,2</sup>, Didi Han<sup>1,2</sup>, Qiao Huang<sup>3</sup>, Fengshuo Xu<sup>1,2</sup>, Shuai Zheng<sup>1,4</sup>, Xiang  
12  
13 Li<sup>5</sup>, Fanfan Zhao<sup>1,2</sup>, Xiaojie Feng<sup>1,2</sup>, and Jun Lyu<sup>1,2\*</sup>  
14  
15

16  
17 \*Correspondence: lyujun2020@jnu.edu.cn  
18

19  
20 <sup>1</sup>Department of Clinical Research, The First Affiliated Hospital of Jinan University,  
21  
22 Guangdong Province, 510630, China  
23

24  
25 <sup>2</sup>School of Public Health, Xi'an Jiaotong University Health Science Center, Shaanxi  
26  
27 Province, 710061, China  
28

29  
30 <sup>3</sup>Center for Evidence-Based and Translational Medicine, Zhongnan Hospital of  
31  
32 Wuhan University, Hubei Province, 430071, China  
33

34  
35 <sup>4</sup>School of Public Health, Shaanxi University of Chinese Medicine, Xi'an 712046,  
36  
37 Shaanxi Province, China  
38

39  
40 <sup>5</sup>School of Mechanical Engineering, Xian Jiaotong University, Shaanxi Province,  
41  
42 710049, China  
43  
44

45  
46  
47  
48 Correspondence to: Jun Lyu.  
49

50  
51 Department of Clinical Research, The First Affiliated Hospital of Jinan University,  
52  
53 613 west huangpu avenue, tianhe district, Guangzhou, Guangdong Province, 510630,  
54  
55 China.  
56  
57

58 **Telephone: +8613922274169; Email: lyujun2020@jnu.edu.cn.**  
59  
60

## Abstract

**Objectives:** This study aimed to use a competing-risks model to establish a nomogram to accurately analyze the prognostic factors for upper tract urothelial carcinoma (UTUC) cancer-specific death (CSD).

**Design:** Retrospective observational cohort study.

**Setting:** The program has yielded a database of all cancer patients in 18 defined geographic regions of the United States.

**Participants:** We selected UTUC patients from the latest edition of the Surveillance, Epidemiology, and End Results (SEER) database from 1975 to 2016. After excluding patients with unknown histological grade, tumor size, and lymph node status, finally 2576 patients were selected.

**Primary and secondary outcome measures:** We used the Fine-Gray proportional subdistribution hazards model for multivariate analysis and compared the results with cause-specific hazards model. We finally constructed a nomogram for the 3, 5, and 8 years CSD rates and tested these rates in a validation cohort.

**Results:** The proportional subdistribution hazards model showed that sex, tumor size, distant metastasis, surgery status, number of lymph nodes positive (LNP), and lymph nodes ratio (LNR) were independent prognostic factors for CSD. All significant factors associated with CSD were included in the nomogram. The 3-, 5-, and 8-years concordance indexes were 0.719, 0.702, and 0.692 in the training cohort, and 0.701, 0.675, and 0.668 in the validation cohort, respectively.

**Conclusions:** The competing-risks model showed that sex, tumor size, distant

1  
2  
3  
4 metastasis, surgery status, LNP and LNR were associated with CSD. The nomogram  
5  
6 predicts the probability of CSD in UTUC patients at 3, 5, and 8 years, which may help  
7  
8 clinicians to predict the survival probabilities in individual patients.  
9  
10

### 11 **Strengths and limitations of this study:**

- 12 •The study established the first competing risk nomogram for predicting the 3-, 5-,  
13  
14 and 8-year specific mortality probability for UTUC based on a large retrospective  
15  
16 sample, which can improve the ability of clinicians to predict the survival  
17  
18 probabilities in individual patients.  
19  
20
- 21 •The established model is not comprehensive enough, because the SEER database  
22  
23 does not include all prognostic factors for UTUC.  
24  
25
- 26 •The data available on the treatment status are not sufficiently detailed to distinguish  
27  
28 the impact of various treatment plans.  
29  
30
- 31 •The model requires prospective studies to confirm its reliability.  
32  
33  
34  
35  
36

37 **Keywords:** competing risk model, upper-tract urothelial carcinoma(UTUC),  
38  
39 nomogram, SEER, cancer-specific death  
40  
41

42 **Abbreviations:** UTUC: upper-tract urothelial carcinoma; CSD: cancer-specific death;  
43  
44 DOC: death due to other causes; SEER: Surveillance, Epidemiology, and End  
45  
46 Results; LNE: lymph nodes examined; LNP: lymph nodes positive; K-M:  
47  
48 Kaplan-Meier; CIF: cumulative incidence function; ICD-O-3: International  
49  
50 Classification of Diseases for Oncology-3; LNR: lymph nodes ratio; C-index:  
51  
52 concordance index; CS: cause-specific hazards model; SD: proportional  
53  
54 subdistribution hazards model  
55  
56  
57  
58  
59  
60

## Introduction

Urothelial carcinomas are the fourth most common type of tumor [1], which is located in the upper or lower urinary tract. Upper-tract urothelial carcinoma (UTUC), including the renal pelvis and ureter carcinoma, currently accounts for 5% of urothelial malignancies [2]. The annual incidence of UTUC is typically estimated at 1 or 2 per 100,000 inhabitants in Western countries [3]. However, the increasing morbidity and mortality associated with UTUC [4, 5] are growing the importance of this research.

A previous study showed that UTUC has unique prognostic factors, which are different from bladder cancer and other urinary tract cancers [6]. Most studies analyzing the prognostic factors for UTUC have adopted the Kaplan-Meier (K-M) method or Cox regression methods [7–9]. These methods only consider a single endpoint while determining survival parameters. However, in clinical research, in addition to events of interest, there are often competing events. Competing events for cancer deaths refer to death from other causes unrelated to primary cancer, such as other diseases, car collisions, and suicide. In traditional survival analysis methods, these events were considered censored, making the cumulative incidence of cancer deaths overestimated. Applying standard survival analysis to competing-risks data leads to false and biased results [10]. Although the use of all-cause death as the study endpoint does not cause a competing risk bias, such an analysis cannot reflect the influence of factors on the specific endpoint of cancer death. Therefore, the

1  
2  
3  
4 cumulative incidence function (CIF) of UTUC cancer-specific death (CSD) needs to  
5  
6 be calculated, and prognostic factors for UTUC analyzed using the Fine-Gray  
7  
8 proportional subdistribution hazards model [11].  
9  
10

11 A nomogram is based on a prognostic model and graphically represents the  
12  
13 predictive abilities of different prognostic factors as the lengths of line segments.  
14  
15 This format makes it easy for clinicians to make rapid and comprehensive decisions  
16  
17 and predict the probability of CSD, which has great clinical significance. Some  
18  
19 studies have constructed competing-risks nomograms for cancers such as sarcoma  
20  
21 and prostate cancer [12, 13], but there is a lack of studies related to the UTUC.  
22  
23  
24  
25

26  
27 The purpose of our research was to identify the prognostic factors of UTUC  
28  
29 based on the competing risks model and used them to construct a nomogram to  
30  
31 predict the survival rates of patients at the 3, 5, and 8 years.  
32  
33  
34

## 35 **Methods**

### 36 **Database and patients**

37  
38 The Surveillance, Epidemiology, and End Results (SEER) program has yielded a  
39  
40 database of all cancer patients in 18 defined geographic regions of the United States  
41  
42 collected by the National Cancer Institute. It is the largest cancer registry in the  
43  
44 United States, including information on approximately 28% of the United States  
45  
46 population. The SEER research data is publicly available; therefore, no informed  
47  
48 consent or institutional review board approval is required when analyzing the data.  
49  
50 We additionally requested chemotherapy data for inclusion in our research and  
51  
52 obtained a license for using SEER software [14, 15].  
53  
54  
55  
56  
57  
58  
59  
60



1  
2  
3  
4 We selected UTUC patients from the latest edition of the SEER database from  
5  
6 1975 to 2016. The primary sites were extracted using the SEER codes of  
7  
8 “C65.9-Renal pelvis” and “C66.9-Ureter.” Patients between 2004 and 2015 were  
9  
10 included in the study. We included all of the histological subtypes of UTUC,  
11  
12 according to the ICD-O-3 (third revision of the International Classification of  
13  
14 Diseases for Oncology). The following demographic indicators were selected: age at  
15  
16 diagnosis, sex, race, and marital status. The primary site, histological grade, tumor  
17  
18 size, laterality, distant metastasis, surgery status, radiotherapy status, chemotherapy  
19  
20 status, number of lymph nodes examined (LNE), lymph nodes positive (LNP), and  
21  
22 lymph nodes ratio (LNR; calculated as the number of LNP divided by LNE) were also  
23  
24 included as pathological characteristics. The tumor size was divided into three groups:  
25  
26 <2, 2–4, and  $\geq 4$  cm [1, 16]. The study outcomes included CSD and death due to other  
27  
28 causes (DOC). The survival time was reported in the available data in months.  
29  
30  
31  
32  
33  
34  
35  
36

### 37 **Exclusion criteria**

38  
39  
40 Our preliminary selection of the above methods initially identified 13,581  
41  
42 patients. Then, to ensure the study's accuracy, the exclusion criteria for the study data  
43  
44 are as follows: unknown histological grade, unknown tumor size, and unknown lymph  
45  
46 nodes status. The specific data selection process is shown in Figure 1. We finally  
47  
48 chose 2576 patients for inclusion in follow-up investigations.  
49  
50  
51  
52

53 Figure 1

### 54 **Statistical methods**

55  
56  
57 We randomly divided the 2576 eligible patients into 2 groups using R software  
58  
59  
60

1  
2  
3  
4 (version 3.5.3, The R Foundation for Statistical Computing, Vienna, Austria;  
5  
6 <http://www.r-project.org>): 70% (n=1803) in the training cohort and 30% (n=773) in  
7  
8 the validation cohort. We first described the basic composition of each factor in the  
9  
10 two patient cohorts using R software. The age, LNE, LNP and LNR were expressed  
11  
12 as median and interquartile-range values, while categorical variables were represented  
13  
14 as percentages. We evaluated differences in patient characteristics between two  
15  
16 groups using the Student's t-test and Chi-square test.  
17  
18  
19  
20  
21

22 We used the cumulative incidence function (CIF) to describe the probability of  
23  
24 each event and also plotted the corresponding CIF curves. Moreover, Gray's test was  
25  
26 used for univariate analysis to estimate the difference in CIF between groups.  
27  
28 Significant variables ( $P < 0.05$ ) were included in the multivariate regression model.  
29  
30 The Fine-Gray proportional sub-distribution hazards model was used for the  
31  
32 multivariate analysis and compared with the results of the cause-specific hazards  
33  
34 model. Applying the standard Cox regression method ignores the presence of  
35  
36 competing risks and hence overestimates the actual incidence of beneficial events,  
37  
38 leading to inappropriate risk stratification [17]. Several studies have confirmed that  
39  
40 different approaches can be used in competing-risks settings for multivariate survival  
41  
42 analysis. However, proportional subdistribution hazards model is the best method to  
43  
44 predict the survival probability [18-20].  
45  
46  
47  
48  
49  
50  
51  
52

53 Finally, the results of Fine-Gray proportional sub-distribution hazards model  
54  
55 were used to construct a nomogram of the 3, 5, and 8 years CSD rates. We used the  
56  
57 concordance index (C-index) and calibration plots to evaluate the differentiation  
58  
59  
60

1  
2  
3  
4 ability and consistency of the established model in training and validation cohorts.  
5

6 All statistical tests were conducted using R software (version 3.5.3). Probability  
7 values of  $P < 0.05$  were considered statistically significant, and all tests were  
8 two-sided. The SEER database can be accessed free of charge, and this study was  
9  
10  
11  
12  
13  
14  
15  
16  
17  
18  
19  
20  
21  
22  
23  
24  
25  
26  
27  
28  
29  
30  
31  
32  
33  
34  
35  
36  
37  
38  
39  
40  
41  
42  
43  
44  
45  
46  
47  
48  
49  
50  
51  
52  
53  
54  
55  
56  
57  
58  
59  
60  
exempted from obtaining informed consent.

### **Patients and public involvement**

This study was conducted without patient involvement. Patients were not invited to comment on the study design and were not consulted to develop patient-relevant outcomes or interpret the results. Moreover, patients were not allowed to contribute to the writing or editing of this document for readability or accuracy.

## **Results**

### **Patient characteristics**

The composition of each variable for the 2576 patients in the training and validation cohorts is presented in Table 1. The median age was 71 years in the training and validation cohorts, respectively. The majority of patients were male (60.6% and 57.4%), white (86.2% and 82.5%), and married (86.8% and 87.6%). The main UTUC sites were in the renal pelvis (63.9% and 62.7%, respectively, in the training and validation cohorts), with the rest in the ureter. The majority of patients were in the undifferentiated stage (58.1% and 55.6%), and most of the tumors in both cohorts were larger than 4 cm. Most patients in both cohorts had received surgery, whereas a few patients had received radiotherapy or chemotherapy. Only about 9% of patients had distant metastasis. The baseline characteristics of the training cohorts and

validation cohorts were similar.

Table 1

### Univariate analysis

We calculated the 3-, 5-, and 8-years cumulative incidence rates of CSD and DOC. Year, laterality, and marital status were not related to either outcome ( $P>0.05$ ), while age, sex, histological grade, chemotherapy status, and LNR were related to both outcomes ( $P<0.05$ ). Race, primary site, tumor size, surgery status, radiotherapy status, distant metastasis, LNE, and LNP were significantly related to CSD. The corresponding CIF curves are shown in Figure 2. The cumulative incidence of CSD and DOC are compared in Table 2.

Figure 2, Table 2

### Multivariate analysis

Table 3 shows the comparison of the proportional sub-distribution hazards model with the cancer-specific hazards model. The cancer-specific hazards model showed that sex, tumor size, distant metastasis, LNP and LNR were prognostic factors for UTUC ( $P<0.001$ ). Then, we constructed the Fine-Gray proportional sub-distribution hazards model, indicating that sex (hazard ratio [HR]=1.480 for female, 95% confidence interval [CI]=1.241–1.764), tumor size (HR=1.556 for 2–4 cm, 95% CI=1.092–2.216; HR=2.205 for  $\geq 4$  cm, 95% CI=1.575–3.087), surgery status (HR=2.205 for no/unknown surgery, 95% CI=1.292–3.761), distant metastasis (HR=2.414 for distant, 95% CI=1.842–3.163), LNP (HR=1.064, 95%

1  
2  
3  
4 CI=1.022-1.107), and LNR (HR=1.873, 95% CI=1.435-2.445) were prognostic  
5  
6 factors affecting UTUC, as shown in Table 3.  
7

8  
9 

|         |
|---------|
| Table 3 |
|---------|

### 10 11 **Construction and verification of the nomogram**

12  
13  
14 Figure 3 shows the nomogram constructed according to the results of the  
15 Fine-Gray proportional subdistribution hazards model for predicting the CSD  
16 probabilities at 3, 5, and 8 years. LNP had the most significant impact on the  
17 probability of CSD, followed by distant metastasis, tumor size, LNR, surgery, and sex  
18 (Figure 3).  
19  
20  
21  
22  
23  
24  
25

26  
27 We used both the training and validation cohorts to verify the nomogram after  
28 establishing it. The 3-, 5-, and 8-years C-indexes were 0.719, 0.702, and 0.692 for the  
29 training cohort, respectively, and 0.701, 0.675, and 0.668 for the validation cohort. All  
30 of these values exceeded 0.6, indicating that the model had good discrimination  
31 ability. We then tested the prediction accuracy of the model. As shown in Figure 4,  
32 the 3-, 5-, and 8-years calibration plots for both cohorts were very close to the  
33 standard straight line, demonstrating that the model was well-calibrated.  
34  
35  
36  
37  
38  
39  
40  
41  
42  
43  
44

45 

|              |
|--------------|
| Figures 3, 4 |
|--------------|

### 46 47 **Discussion**

48  
49  
50 The increasing incidence of UTUC [21] makes it necessary to further explore the  
51 prognostic factors for UTUC. The present study used a competing-risks model to  
52 accurately explore the prognostic factors for UTUC. It used these factors to construct  
53 a nomogram that provides clinicians with direct guidance while making relevant  
54  
55  
56  
57  
58  
59  
60

1  
2  
3  
4 decisions.

5  
6 The application of study criteria resulted in the inclusion of 2576 patients from  
7  
8 the SEER database, and 1542 of these patients died during the follow-up. However,  
9  
10 only 750 of the deaths were related to UTUC. These results indicate that the number  
11  
12 of DOC patients was almost the same as that for CSD. In this situation, if the  
13  
14 traditional K-M or Cox survival analysis had been adopted, the DOC patients will be  
15  
16 regarded as censored. This will lead to an overestimation of the cumulative incidence  
17  
18 of CSD, which cannot truly reflect the prognosis [22, 23]. We overcame this  
19  
20 shortcoming by using a competing risks model, which can adequately address the  
21  
22 situation where the available data are related to multiple potential outcomes [24]. This  
23  
24 method was first proposed by Fine and Gray and applied in previous studies [17,25–  
25  
26 26]. In the case of competing risks, there are usually two models. One is the  
27  
28 cause-specific hazards model (CS), the other is the proportional sub-distribution  
29  
30 hazards model (SD), also known as the Fine-Gary model. In the present study, two  
31  
32 models were analyzed and compared. CS is suitable for answering etiological  
33  
34 questions, and SD is suitable for establishing clinical prediction models and risk  
35  
36 scores. Therefore, we used the CIF and the proportional sub-distribution hazards  
37  
38 model to explore the impact of various factors on the prognosis of CSD.  
39  
40  
41  
42  
43  
44  
45  
46  
47  
48  
49

50 The univariate analysis results showed that age, sex, race, primary site,  
51  
52 histological grade, tumor size, surgery status, radiotherapy status, chemotherapy  
53  
54 status, distant metastasis, LNE, LNP, and LNR were influencing factors for CSD,  
55  
56 while age, sex, histological grade, chemotherapy status, and LNR were influencing  
57  
58  
59  
60

1  
2  
3  
4 factors for DOC. The cause-specific hazards model results showed that age, sex,  
5  
6 histological grade, tumor size, distant metastasis, LNP, and LNR were prognostic  
7  
8 factors for CSD. The proportional sub-distribution hazards model showed that sex,  
9  
10 tumor size, surgery, distant metastasis, LNP, and LNR are independent prognostic  
11  
12 factors for CSD.  
13  
14  
15

16  
17 Age is generally considered to be a prognostic factor for most cancers, and also  
18  
19 for UTUC [27, 28]. Our CS model showed that age was a predictor of CSD; however,  
20  
21 it was not statistically significant in the SD model. This may be because the effect of  
22  
23 age on DOC is higher than the CSD; namely, elderly patients are more likely to die of  
24  
25 other causes, which competitively leads to the fact that CSD incidence does not  
26  
27 increase significantly with age. Sex and race have always been controversial  
28  
29 prognostic factors. A previous study showed that race was a preoperative prognostic  
30  
31 factor for UTUC patients [29]. Moreover, another study found no statistically  
32  
33 significant differences in survival between males and females [30]. However, the  
34  
35 competing-risks model in our study showed that sex was a risk factor for UTUC,  
36  
37 while race was not. This may be because previous studies ignored the effect of  
38  
39 competing risks. However, since most of the patients included in the SEER database  
40  
41 are white; therefore, studies on different races need to be conducted.  
42  
43  
44  
45  
46  
47  
48  
49

50  
51 Tumor size is also considered to be related to cancer prognosis. One study found  
52  
53 5-year recurrence-free survival rates for UTUC patients with tumor sizes <3 cm and  
54  
55  $\geq 3$  cm of 46.9% and 25.8%, respectively [31]. The univariate and multivariate  
56  
57 analyses performed in the present study also indicated that tumor size was an  
58  
59  
60

1  
2  
3  
4 influencing factor for CSD. The prognosis was worse for tumors larger than 2 cm. In  
5  
6 addition, our research also found that distant metastasis was an important risk factor  
7  
8 for CSD. In terms of treatment methods, our study suggested that surgery status was a  
9  
10 significant prognostic factor, which was consistent with the findings of Yuval et al.  
11  
12 [32]. Surgery has long been considered the gold standard of UTUC treatment.  
13  
14 However, radiotherapy status and chemotherapy status were not influencing factors  
15  
16 for CSD in both competing risks models. This result conflicted with some previous  
17  
18 findings, [33–35] suggesting that traditional Cox regression analysis overestimated  
19  
20 the effects of radiotherapy and chemotherapy. Obviously, the relative lack of  
21  
22 information on the radiotherapy status and chemotherapy status in the SEER database  
23  
24 may also lead to inaccurate results, and thus further exploration of these indicators is  
25  
26 needed.  
27  
28  
29  
30  
31  
32  
33

34  
35 Some indicators related to lymph nodes (e.g., distant lymph node metastasis,  
36  
37 LNP, and LNE) are important clinical information for cancer prognosis, but whether  
38  
39 they are independent prognostic factors for UTUC has not been determined. One  
40  
41 study found that lymph node metastases were significantly associated with reduced  
42  
43 cancer-specific survival in univariate analysis [36]. It is worth noting that very few  
44  
45 studies have investigated LNP, LNE, and LNR. Our study is the first to use the SEER  
46  
47 database to analyze the prognostic impact of these indicators on UTUC, and the  
48  
49 results may be more accurate than those involving small samples. LNR is an emerging  
50  
51 indicator that has been regarded as a prognostic factor in rectal cancer and breast  
52  
53 cancer [37, 38]. Our results also suggested that LNR was an important prognostic  
54  
55  
56  
57  
58  
59  
60



1  
2  
3  
4 factor of UTUC. We found that LNE was an influencing factor for UTUC in the  
5  
6 univariate analysis but not in the multivariate analysis. Moreover, both LNR and LNP  
7  
8 entered the proportional sub-distribution hazards model, suggesting that after  
9  
10 adjusting for the effects of LNR and LNP, LNE was no longer an independent  
11  
12 prognostic indicator. LNP was a prognostic factor in all of the analyses, indicating  
13  
14 that it significantly influences the prognosis of UTUC.  
15  
16  
17  
18

19  
20 We utilized the results from the above-mentioned proportional sub-distribution  
21  
22 hazards model to construct a nomogram that graphically represents the degrees of  
23  
24 influence of various prognostic factors. This nomogram can be used to predict the 3-,  
25  
26 5-, and 8-years probabilities of CSD in UTUC patients. The predictive function of the  
27  
28 nomogram has been used for different types of cancer and has even been proposed as  
29  
30 a new standard. The nomogram is easy to use. In order to calculate the CSD  
31  
32 probability of a UTUC patient, find the patient's sex (Male or Female) on the sex row,  
33  
34 draw a vertical line on the dot row, and get the sex score value. Repeat the above  
35  
36 steps for tumor size, M stage, surgery, LNP, and LNR. Add the score values of each  
37  
38 variable, find the total point on the total point axis, and draw a straight downward line  
39  
40 to get the 3, 5, and 8 years CSD probability of the UTUC patient. For example, a  
41  
42 female (30 points), with a tumor size of 1.5cm (0 points), at M1 stage (68 points), had  
43  
44 performed surgery (0 points), LNP equal to 5 (15 points), and LNR equal to 0.8 (45  
45  
46 points), the total score is 158 points, which corresponds to 3, 5, and 8 years CSD  
47  
48 probability of 58%, 64%, and 69%, respectively.  
49  
50  
51  
52  
53  
54  
55  
56  
57

58 The C-indexes for the nomogram all exceeded 0.6, demonstrating that the model  
59  
60

1  
2  
3  
4 provided a good fit to the available data. The prediction calibration curves in Figure 4  
5  
6 were very close to the standard curve, indicating that the nomogram had good  
7  
8 predictive ability. The results for the validation cohort also showed that the model was  
9  
10 stable. Therefore, this model can help clinicians to quickly and easily determine the  
11  
12 prognosis of individual patients and provide guidance in their clinical  
13  
14 decision-making. However, the stability of the model needs further verification.  
15  
16  
17  
18

19  
20 Our study used the large sample size and high-quality data from SEER database  
21  
22 and competing risks model, which provided a guarantee for the accuracy of our study.  
23  
24 However, inevitably, our research had some limitations. First, the established model is  
25  
26 not comprehensive enough because the SEER database does not include all prognostic  
27  
28 factors for UTUC. Second, the data available on the treatment status are not  
29  
30 sufficiently detailed to distinguish the impact of various treatment plans. Third, as a  
31  
32 retrospective study, our results may be affected by confounding bias to some extent,  
33  
34 so the conclusion needs to be further verified in future prospective studies. Fourth, the  
35  
36 cause of death in SEER is that some deaths may have been misclassified according to  
37  
38 the death certificate report, which may also bring information bias to our study.  
39  
40  
41  
42  
43  
44

## 45 **Conclusions**

46  
47  
48 In summary, this study used a competing-risks model to determine the prognostic  
49  
50 factors for UTUC. The proportional sub-distribution hazards model showed that sex,  
51  
52 tumor size, surgery, distant metastasis, LNP, and LNR were associated with CSD,  
53  
54 while LNE was not. The constructed nomogram can predict the 3, 5, and 8 years CSD  
55  
56 probabilities of patients based on these relevant factors, which can support clinicians  
57  
58  
59  
60

1  
2  
3  
4 to make better decisions of the survival rates of individual patients.  
5  
6

## 7 **Acknowledgments**

8  
9  
10 The authors would like to thank two referees and the associate editor for their  
11  
12  
13 constructive advice.  
14

## 15 **Footnotes**

16  
17  
18 **Contributorship statement:** JL, CZL, and SZ designed the study; QH, DDH, and  
19  
20  
21 FSX collected and analyzed the data; CZL and XL drafted the initial manuscript;  
22  
23  
24 FFZ, and XJF reviewed and edited the article; All authors read and approved the  
25  
26  
27 final manuscript.  
28

29 **Funding:** The study was supported by The National Social Science Foundation of  
30  
31  
32 China (grant no. 16BGL183).  
33

34 **Competing interests:** The authors declare that they have no competing interests.  
35

36 **Data availability statement:** No additional data available  
37

38  
39 **Patient consent for publication:** Informed consent were not required in current study  
40  
41  
42 because SEER research data is publicly available and all patient data are de-identified.  
43

44 **Ethics statement:** All procedures performed in the present study were in accordance  
45  
46  
47 with the principles outlined in the 1964 Helsinki Declaration and its later  
48  
49  
50 amendments. Institutional review board approval and informed consent were not  
51  
52  
53 required in current study because SEER research data is publicly available and all  
54  
55  
56 patient data are de-identified.

57 **Licence statement:** Other than as permitted in any relevant BMJ Author's Self  
58  
59  
60 Archiving Policies, I confirm this Work has not been accepted for publication

1  
2  
3  
4 elsewhere, is not being considered for publication elsewhere and does not duplicate  
5  
6 material already published. I confirm all authors consent to publication of this Work  
7  
8  
9 and authorise the granting of this licence.  
10  
11  
12  
13  
14  
15  
16  
17  
18  
19  
20  
21  
22  
23  
24  
25  
26  
27  
28  
29  
30  
31  
32  
33  
34  
35  
36  
37  
38  
39  
40  
41  
42  
43  
44  
45  
46  
47  
48  
49  
50  
51  
52  
53  
54  
55  
56  
57  
58  
59  
60

For peer review only

## References

1. Roupret M, Babjuk M, Comperat E, Zigeuner R, Sylvester RJ, Burger M, Cowan NC, Gontero P, Van Rhijn BWG, Mostafid AH et al. European association of urology guidelines on upper urinary tract urothelial carcinoma: 2017 update. *Eur Urol.* 2018;73(1):111-22.
2. JJ M, LM E. - upper tract urothelial neoplasms: Incidence and survival during the last 2. D - 0376374. (- 0022-5347 (Print)):- 1523-5.
3. Rouprêt M, Babjuk M, Compérat E, Zigeuner R, Sylvester RJ, Burger M, Cowan NC, Böhle A, Van Rhijn BWG, Kaasinen E et al. European association of urology guidelines on upper urinary tract urothelial cell carcinoma: 2015 update. *European Urology.* 2015;68(5):868-79.
4. Siegel RL, Miller KD, Jemal A. Cancer statistics, 2019. *CA Cancer J Clin.* 2019;69(1):7-34.
5. Raman JD, Messer J, Sielatycki JA, Hollenbeak CS. Incidence and survival of patients with carcinoma of the ureter and renal pelvis in the USA, 1973-2005. *BJU Int.* 2011;107(7):1059-64.
6. Green DA, Rink M, Xylinas E, Matin SF, Stenzl A, Roupret M, Karakiewicz PI, Scherr DS, Shariat SF. Urothelial carcinoma of the bladder and the upper tract: Disparate twins. *Journal of Urology.* 2013;189(4):1214-21.
7. Lughezzani G, Jeldres C, Isbarn H, Shariat SF, Sun M, Pharand D, Widmer H, Arjane P, Graefen M, Montorsi F et al. A critical appraisal of the value of lymph node dissection at nephroureterectomy for upper tract urothelial carcinoma. *Urology.* 2010;75(1):118-24.
8. Novara G, Matsumoto K, Kassouf W, Walton TJ, Fritsche HM, Bastian PJ, Martinez-Salamanca JI, Seitz C, Lemberger RJ, Burger M et al. Prognostic role of lymphovascular invasion in patients with urothelial carcinoma of the upper urinary tract: An international validation study. *Eur Urol.* 2010;57(6):1064-71.
9. Remzi M, Haitel A, Margulis V, Karakiewicz P, Montorsi F, Kikuchi E, Zigeuner R, Weizer A, Bolenz C, Bensalah K et al. Tumour architecture is an independent predictor of outcomes after nephroureterectomy: A multi-institutional analysis of 1363 patients. *BJU Int.* 2009;103(3):307-11.
10. Kim HT. Cumulative incidence in competing risks data and competing risks regression analysis. *Clin Cancer Res.* 2007;13(2 Pt 1):559-65.
11. PC A, JP F. - practical recommendations for reporting fine-gray model analyses for competing. D - 8215016. (- 1097-0258 (Electronic)):- 4391-400.
12. Kattan MW, Heller G, Brennan MF. A competing-risks nomogram for sarcoma-specific death following local recurrence. *Stat Med.* 2003;22(22):3515-25.
13. Abdollah F, Sun M, Schmitges J, Tian Z, Jeldres C, Briganti A, Shariat SF, Perrotte P, Montorsi F, Karakiewicz PI. Cancer-specific and other-cause mortality after radical prostatectomy versus observation in patients with prostate cancer: Competing-risks analysis of a large north american population-based cohort. *Eur Urol.* 2011;60(5):920-30.
14. Surveillance Research Program, National Cancer Institute SEER\*Stat software (seer.cancer.gov/seerstat) version <SEER\*Stat 8.3.6>.
15. Yang J, Liu QQ, Geng H, Tian GX, Zeng XT, Lyu J. SEER database application and data

- 1  
2  
3  
4 extraction methods and processes. *Chinese Journal of Evidence-Based Cardiovascular*  
5 *Medicine*, 2018,10(07):781-784.
- 6 16. Pieras E, Frontera G, Ruiz X, Vicens A, Ozonas M, Pizá P. Concomitant carcinoma in situ  
7 and tumour size are prognostic factors for bladder recurrence after nephroureterectomy  
8 for upper tract transitional cell carcinoma. *BJU Int.* 2010;106(9):1319–1323.
- 9 17. Wolbers M, Koller MT, Witteman JC, Steyerberg EW. Prognostic models with  
10 competing risks: Methods and application to coronary risk prediction. *Epidemiology.*  
11 2009;20(4):555-61.
- 12 18. Noordzij M, Leffondre K, van Stralen KJ, Zoccali C, Dekker FW, Jager KJ. When do  
13 we need competing risks methods for survival analysis in nephrology? *Nephrology*  
14 *Dialysis Transplantation.* 2013;28(11):2670-7.
- 15 19. He, C, Zhang, Y, Cai, Z, Lin, X, Li, S. Overall survival and cancer-specific survival in  
16 patients with surgically resected pancreatic head adenocarcinoma: A competing risk  
17 nomogram analysis. *J Cancer*, 2018. 9(17): p. 3156-3167.20.
- 18 20. Yang, J, Pan, Z, He, Y, Zhao, F, Feng, X, Liu, Q, Lyu, J. Competing-risks model for  
19 predicting the prognosis of penile cancer based on the SEER database. *Cancer Med*,  
20 2019. 8(18): p. 7881-7889.
- 21 21. Soria F, Shariat SF, Lerner SP, Fritsche H-M, Rink M, Kassouf W, Spiess PE, Lotan Y,  
22 Ye D, Fernández MI et al. Epidemiology, diagnosis, preoperative evaluation and  
23 prognostic assessment of upper-tract urothelial carcinoma (utuc). *World Journal of*  
24 *Urology.* 2016;35(3):379-87.
- 25 22. Ludbrook J, Royle AG. Analysing clinical studies: Principles, practice and pitfalls of  
26 kaplan–meier plots. *ANZ Journal of Surgery.* 2008;78(3):204-10.
- 27 23. Putter H, Fiocco M, Geskus RB. Tutorial in biostatistics: Competing risks and multi-state  
28 models. *Statistics in Medicine.* 2007;26(11):2389-430.
- 29 24. Fine JP, Gray RJ. A proportional hazards model for the subdistribution of a competing  
30 risk. *Journal of the American Statistical Association.* 1999;94(446):496-509.
- 31 25. Kutikov A, Egleston BL, Canter D, Smaldone MC, Wong YN, Uzzo RG. Competing  
32 risks of death in patients with localized renal cell carcinoma: A comorbidity based model.  
33 *Journal Of Urology.* 2012;188(6):2077-83.
- 34 26. Bradshaw PT, Stevens J, Khankari N, Teitelbaum SL, Neugut AI, Gammon MD.  
35 Cardiovascular disease mortality among breast cancer survivors. *Epidemiology.*  
36 2016;27(1):6-13.
- 37 27. Margulis V, Shariat SF, Matin SF, Kamat AM, Zigeuner R, Kikuchi E, Lotan Y, Weizer  
38 A, Raman JD, Wood CG et al. Outcomes of radical nephroureterectomy: A series from  
39 the upper tract urothelial carcinoma collaboration. *Cancer.* 2009;115(6):1224-33.
- 40 28. Yap SA, Schupp CW, Chamie K, Evans CP, Koppie TM. Effect of age on transitional cell  
41 carcinoma of the upper urinary tract: Presentation, treatment, and outcomes. *Urology.*  
42 2011;78(1):87-92.
- 43 29. Leow JJ, Orsola A, Chang SL, Bellmunt J. A contemporary review of management and  
44 prognostic factors of upper tract urothelial carcinoma. *Cancer Treat Rev.*  
45 2015;41(4):310-9.
- 46 30. Lughezzani G, Sun M, Perrotte P, Shariat SF, Jeldres C, Budäus L, Latour M, Widmer H,  
47 Duclos A, Bénard F et al. Gender-related differences in patients with stage i to iii upper  
48  
49  
50  
51  
52  
53  
54  
55  
56  
57  
58  
59  
60

- tract urothelial carcinoma: Results from the surveillance, epidemiology, and end results database. *Urology*. 2010;75(2):321-7.
31. Espiritu PN, Sverrisson EF, Sexton WJ, Pow-Sang JM, Poch MA, Dhillon J, Spiess PE. Effect of tumor size on recurrence-free survival of upper tract urothelial carcinoma following surgical resection. *Urol Oncol*. 2014;32(5):619-24.
32. Freifeld, Y., et al., Therapeutic strategies for upper tract urothelial carcinoma. *Expert Rev Anticancer Ther*, 2018. 18(8): p. 765-774.33. T S, RE K, J B, M R, JJ L, SR L, MW V, MA P, N H, AS K et al. - effectiveness of adjuvant chemotherapy after radical nephroureterectomy for. D - 8309333. (- 1527-7755 (Electronic)):- 852-60.
34. Leow JJ, Martin-Doyle W, Fay AP, Choueiri TK, Chang SL, Bellmunt J. A systematic review and meta-analysis of adjuvant and neoadjuvant chemotherapy for upper tract urothelial carcinoma. *European Urology*. 2014;66(3):529-41.
35. Roupret M, Babjuk M, Comperat E, Zigeuner R, Sylvester R, Burger M, Cowan N, Bohle A, Van Rhijn BWG, Kaasinen E et al. European guidelines on upper tract urothelial carcinomas: 2013 update. *European Urology*. 2013;63(6):1059-71.
36. Bolenz C, Fernández MI, Trojan L, Herrmann E, Becker A, Weiss C, Alken P, Ströbel P, Michel MS. Lymphovascular invasion and pathologic tumor stage are significant outcome predictors for patients with upper tract urothelial carcinoma. *Urology*. 2008;72(2):364-9.
37. Jin C, Deng X, Li Y, He W, Yang X, Liu J. Lymph node ratio is an independent prognostic factor for rectal cancer after neoadjuvant therapy: A meta-analysis. *J Evid Based Med*. 2018;11(3):169-75.
38. Vinh-Hung V, Verkooijen HM, Fioretta G, Neyroud-Caspar I, Rapiti E, Vlastos G, Deglise C, Usel M, Lutz JM, Bouchardy C. Lymph node ratio as an alternative to pn staging in node-positive breast cancer. *J Clin Oncol*. 2009;27(7):1062-8.

Table 1 The basic characteristics of the patients in this study.

| Variables                 | Training Cohort      | Validation Cohort    | <i>p</i> |
|---------------------------|----------------------|----------------------|----------|
| Number of Patients, n (%) | 1803(70%)            | 773(30%)             |          |
| Age, Median (IQR)         | 71.00 (64.00, 78.00) | 71.00 (63.00, 78.00) | 0.710    |
| Sex, n (%)                |                      |                      | 0.150    |
| Female                    | 711 (39.4)           | 329 (42.6)           |          |
| Male                      | 1092 (60.6)          | 444 (57.4)           |          |
| Race, n (%)               |                      |                      | 0.045    |
| Black                     | 80 ( 4.4)            | 50 ( 6.5)            |          |
| Other                     | 169 ( 9.4)           | 83 (10.7)            |          |
| White                     | 1554 (86.2)          | 640 (82.8)           |          |
| Marital status, n (%)     |                      |                      | 0.656    |
| Married                   | 1565 (86.8)          | 677 (87.6)           |          |
| Others                    | 67 ( 3.7)            | 31 ( 4.0)            |          |
| Single                    | 171 ( 9.5)           | 65 ( 8.4)            |          |
| Year, n (%)               |                      |                      | 0.813    |
| 2004-2006                 | 346 (19.2)           | 159 (20.6)           |          |
| 2007-2009                 | 439 (24.3)           | 181 (23.4)           |          |
| 2010-2012                 | 479 (26.6)           | 198 (25.6)           |          |
| 2013-2015                 | 539 (29.9)           | 235 (30.4)           |          |
| Site, n (%)               |                      |                      | 0.609    |
| Renal pelvis              | 1152 (63.9)          | 485 (62.7)           |          |
| Ureter                    | 651 (36.1)           | 288 (37.3)           |          |
| Grade, n (%)              |                      |                      | 0.481    |
| Grade I                   | 47 ( 2.6)            | 16 ( 2.1)            |          |
| Grade II                  | 149 ( 8.3)           | 69 ( 8.9)            |          |
| Grade III                 | 559 (31.0)           | 258 (33.4)           |          |
| Grade IV                  | 1048 (58.1)          | 430 (55.6)           |          |
| Size, n (%)               |                      |                      | 0.188    |
| [2,4)                     | 559 (31.0)           | 268 (34.7)           |          |
| <2                        | 262 (14.5)           | 106 (13.7)           |          |
| >=4                       | 982 (54.5)           | 399 (51.6)           |          |
| Laterality, n (%)         |                      |                      | 0.551    |
| Left                      | 995 (55.2)           | 416 (53.8)           |          |
| Right                     | 808 (44.8)           | 357 (46.2)           |          |
| Surgery, n (%)            |                      |                      | 0.203    |
| NO/Unknown                | 9 ( 0.5)             | 8 ( 1.0)             |          |
| Yes                       | 1794 (99.5)          | 765 (99.0)           |          |
| Radiotherapy, n (%)       |                      |                      | 0.931    |
| NO/Unknown                | 1676 (93.0)          | 720 (93.1)           |          |
| Yes                       | 127 ( 7.0)           | 53 ( 6.9)            |          |
| Chemotherapy, n (%)       |                      |                      | 0.938    |



|                           |                   |                   |       |
|---------------------------|-------------------|-------------------|-------|
| NO/Unknown                | 1243 (68.9)       | 531 (68.7)        |       |
| Yes                       | 560 (31.1)        | 242 (31.3)        |       |
| Distant metastasis, n (%) |                   |                   | 0.053 |
| M0                        | 1652 (91.6)       | 689 (89.1)        |       |
| M1                        | 151 ( 8.4)        | 84 (10.9)         |       |
| LNE, Median (IQR)         | 3.00 (1.00, 7.00) | 3.00 (1.00, 7.00) | 0.627 |
| LNP, Median (IQR)         | 0.00 (0.00, 1.00) | 0.00 (0.00, 1.00) | 0.542 |
| LNR, Median (IQR)         | 0.00 (0.00, 0.50) | 0.00 (0.00, 0.33) | 0.546 |

Abbreviations: IQR, interquartile-range; LNE, lymph nodes examined; LNP, lymph nodes positive; LNR, lymph nodes ratio.

For peer review only

Table 2 The cumulative incidences of CSD and DOC among patients with UTUC.

| Variables      | Cancer-specific death (%) |                       |                       |        | Death due to other causes (%) |                       |                       |        |
|----------------|---------------------------|-----------------------|-----------------------|--------|-------------------------------|-----------------------|-----------------------|--------|
|                | 3-Year (95%CI)            | 5-Year (95%CI)        | 8-Year (95%CI)        | P      | 3-Year (95%CI)                | 5-Year (95%CI)        | 8-Year (95%CI)        | P      |
| Age            |                           |                       |                       | <0.001 |                               |                       |                       | <0.001 |
| Sex            |                           |                       |                       | <0.001 |                               |                       |                       | <0.001 |
| Male           | 22.903(22.843-22.964)     | 27.131(27.064-27.197) | 29.457(29.386-29.528) |        | 25.697(25.634-25.760)         | 33.645(33.573-33.717) | 40.755(40.673-40.837) |        |
| Female         | 33.320(33.236-33.405)     | 38.157(38.066-38.247) | 40.339(40.245-40.434) |        | 18.710(18.639-18.780)         | 24.144(24.063-24.225) | 29.031(28.937-29.125) |        |
| Race           |                           |                       |                       | 0.008  |                               |                       |                       | 0.057  |
| White          | 25.881(25.828-25.934)     | 29.921(29.864-29.979) | 31.856(31.796-31.916) |        | 23.502(23.451-23.554)         | 30.839(30.780-30.898) | 37.596(37.528-37.664) |        |
| Black          | 35.688(35.423-35.952)     | 44.479(44.194-44.763) | 48.470(48.178-48.762) |        | 22.782(22.555-23.009)         | 27.889(27.638-28.139) | 30.253(29.987-30.519) |        |
| Other          | 33.577(33.399-33.755)     | 39.945(39.752-40.138) | 43.895(43.688-44.102) |        | 17.728(17.586-17.869)         | 22.120(21.960-22.281) | 25.822(25.642-26.003) |        |
| Marital status |                           |                       |                       | 0.578  |                               |                       |                       | 0.888  |
| Married        | 26.658(26.605-26.711)     | 31.020(30.962-31.077) | 33.378(33.317-33.440) |        | 23.164(23.113-23.215)         | 30.048(29.990-30.106) | 36.490(36.423-36.557) |        |
| Single         | 28.974(28.808-29.140)     | 35.148(34.964-35.331) | 37.145(36.956-37.334) |        | 20.973(20.824-21.122)         | 28.420(28.246-28.593) | 33.095(32.902-33.287) |        |
| Others         | 30.406(30.132-30.681)     | 32.762(32.475-33.048) | 32.762(32.475-33.048) |        | 22.481(22.231-22.730)         | 30.490(30.186-30.794) | 35.083(34.731-35.436) |        |
| Year           |                           |                       |                       | 0.430  |                               |                       |                       | 0.535  |
| 2004-2006      | 27.535(27.424-27.646)     | 31.883(31.767-31.999) | 33.622(33.505-33.739) |        | 24.057(23.951-24.164)         | 32.174(32.058-32.290) | 38.551(38.430-38.672) |        |
| 2007-2009      | 29.665(29.564-29.765)     | 34.035(33.930-34.139) | 36.463(36.356-36.569) |        | 22.606(22.513-22.698)         | 28.351(28.252-28.451) | 34.151(34.045-34.256) |        |
| 2010-2012      | 26.033(25.940-26.126)     | 30.269(30.170-30.368) | —                     |        | 21.838(21.751-21.926)         | 28.813(28.715-28.910) | —                     |        |
| 2013-2015      | 25.678(25.572-25.784)     | —                     | —                     |        | 23.766(23.661-23.871)         | —                     | —                     |        |
| Site           |                           |                       |                       | <0.001 |                               |                       |                       | 0.161  |
| Renal pelvis   | 30.986(30.921-31.051)     | 36.259(36.189-36.329) | 38.503(38.430-38.577) |        | 22.942(22.883-23.001)         | 28.605(28.539-28.672) | 33.500(33.425-33.576) |        |
| Ureter         | 19.946(19.870-20.021)     | 23.033(22.951-23.114) | 25.368(25.279-25.456) |        | 22.948(22.868-23.028)         | 32.131(32.037-32.225) | 40.713(40.604-40.822) |        |
| Grade          |                           |                       |                       | <0.001 |                               |                       |                       | 0.043  |
| Well           | 13.707(13.463-13.950)     | 13.707(13.463-13.950) | 13.707(13.463-13.950) |        | 18.635(18.356-18.914)         | 21.710(21.406-22.015) | 40.163(39.717-40.609) |        |

|    |                    |                       |                       |                       |                       |                       |                       |   |        |
|----|--------------------|-----------------------|-----------------------|-----------------------|-----------------------|-----------------------|-----------------------|---|--------|
| 1  |                    |                       |                       |                       |                       |                       |                       |   |        |
| 2  |                    |                       |                       |                       |                       |                       |                       |   |        |
| 3  |                    |                       |                       |                       |                       |                       |                       |   |        |
| 4  |                    |                       |                       |                       |                       |                       |                       |   |        |
| 5  | Moderate           | 10.664(10.543-10.785) | 13.393(13.255-13.530) | 15.852(15.696-16.008) | 10.147(10.028-10.267) | 18.691(18.530-18.853) | 27.546(27.340-27.752) |   |        |
| 6  | Poor               | 30.407(30.315-30.498) | 35.156(35.059-35.253) | 37.336(37.236-37.437) | 24.420(24.335-24.506) | 30.727(30.633-30.822) | 36.164(36.060-36.269) |   |        |
| 7  | Undifferential     | 28.133(28.066-28.200) | 33.013(32.939-33.086) | 35.492(35.413-35.572) | 24.207(24.142-24.271) | 31.584(31.510-31.658) | 37.338(37.252-37.424) |   |        |
| 8  |                    |                       |                       |                       |                       |                       |                       |   |        |
| 9  | Size               |                       |                       |                       | <0.001                |                       |                       |   | 0.733  |
| 10 | <2                 | 11.702(11.603-11.801) | 15.012(14.896-15.129) | 18.912(18.770-19.054) | 23.698(23.568-23.828) | 30.965(30.815-31.114) | 41.203(41.019-41.386) |   |        |
| 11 | [2,4)              | 20.339(20.257-20.421) | 25.952(25.859-26.046) | 27.404(27.307-27.501) | 21.685(21.601-21.769) | 29.655(29.556-29.754) | 38.855(38.736-38.974) |   |        |
| 12 | ≥4                 | 34.800(34.728-34.872) | 38.868(38.792-38.944) | 41.162(41.083-41.242) | 23.457(23.393-23.521) | 29.773(29.701-29.845) | 33.440(33.361-33.519) |   |        |
| 13 |                    |                       |                       |                       |                       |                       |                       |   |        |
| 14 | Laterality         |                       |                       |                       | 0.944                 |                       |                       |   | 0.393  |
| 15 | Left               | 26.970(26.903-27.037) | 31.835(31.762-31.908) | 33.636(33.560-33.713) | 22.586(22.523-22.650) | 29.551(29.479-29.624) | 35.006(34.923-35.089) |   |        |
| 16 | Right              | 27.092(27.017-27.167) | 31.010(30.929-31.091) | 33.867(33.781-33.954) | 23.335(23.264-23.406) | 30.305(30.223-30.387) | 37.564(37.469-37.659) |   |        |
| 17 |                    |                       |                       |                       |                       |                       |                       |   |        |
| 18 | Surgery            |                       |                       |                       | 0.001                 |                       |                       |   | 0.980  |
| 19 | Yes                | 26.715(26.665-26.765) | 31.206(31.152-31.260) | 33.490(33.432-33.547) | 22.940(22.893-22.988) | 29.950(29.895-30.004) | 36.234(36.171-36.296) |   |        |
| 20 | NO/Unknown         | 77.778(76.910-78.646) | —                     | —                     | 22.222(21.522-22.923) | —                     | —                     |   |        |
| 21 |                    |                       |                       |                       |                       |                       |                       |   |        |
| 22 | Radiotherapy       |                       |                       |                       | <0.001                |                       |                       |   | 0.910  |
| 23 | Yes                | 44.203(43.994-44.413) | 50.407(50.191-50.623) | 51.767(51.548-51.986) | 25.971(25.788-26.155) | 32.016(31.816-32.217) | 34.632(34.422-34.842) |   |        |
| 24 | NO/Unknown         | 25.670(25.619-25.721) | 29.951(29.896-30.007) | 32.292(32.233-32.351) | 22.699(22.650-22.748) | 29.733(29.677-29.789) | 36.285(36.220-36.350) |   |        |
| 25 |                    |                       |                       |                       |                       |                       |                       |   |        |
| 26 | Chemotherapy       |                       |                       |                       | <0.001                |                       |                       |   | 0.003  |
| 27 | Yes                | 36.276(36.177-36.375) | 41.751(41.646-41.857) | 43.283(43.175-43.391) | 20.156(20.074-20.239) | 26.807(26.711-26.903) | 30.702(30.598-30.807) |   |        |
| 28 | NO/Unknown         | 22.979(22.922-23.035) | 27.032(26.970-27.094) | 29.614(29.547-29.681) | 24.177(24.119-24.235) | 31.278(31.212-31.344) | 38.534(38.457-38.611) |   |        |
| 29 |                    |                       |                       |                       |                       |                       |                       |   |        |
| 30 | Distant metastasis |                       |                       |                       | <0.001                |                       |                       |   | 0.641  |
| 31 | No                 | 23.438(23.388-23.488) | 28.067(28.012-28.122) | 30.550(30.491-30.609) | 22.674(22.624-22.723) | 29.966(29.909-30.024) | 36.800(36.734-36.866) |   |        |
| 32 | Yes                | 65.586(65.407-65.765) | 67.967(67.789-68.144) | 67.967(67.789-68.144) | 25.548(25.384-25.713) | 28.750(28.577-28.922) | 28.750(28.577-28.922) |   |        |
| 33 |                    |                       |                       |                       |                       |                       |                       |   |        |
| 34 | LNE                | —                     | —                     | —                     | <0.001                | —                     | —                     | — | 0.941  |
| 35 | LNP                | —                     | —                     | —                     | <0.001                | —                     | —                     | — | 0.448  |
| 36 | LNR                | —                     | —                     | —                     | <0.001                | —                     | —                     | — | <0.001 |
| 37 |                    |                       |                       |                       |                       |                       |                       |   |        |
| 38 |                    |                       |                       |                       |                       |                       |                       |   |        |
| 39 |                    |                       |                       |                       |                       |                       |                       |   |        |
| 40 |                    |                       |                       |                       |                       |                       |                       |   |        |
| 41 |                    |                       |                       |                       |                       |                       |                       |   |        |
| 42 |                    |                       |                       |                       |                       |                       |                       |   |        |
| 43 |                    |                       |                       |                       |                       |                       |                       |   |        |
| 44 |                    |                       |                       |                       |                       |                       |                       |   |        |
| 45 |                    |                       |                       |                       |                       |                       |                       |   |        |
| 46 |                    |                       |                       |                       |                       |                       |                       |   |        |

1  
2  
3  
4  
5  
6 Abbreviations: CSD, cancer-specific death; DOC, death due to other causes; UTUC, upper-tract urothelial carcinoma; CI, confidence interval;  
7 LNE, lymph nodes examined; LNP, lymph nodes positive; LNR, lymph nodes ratio.  
8  
9  
10  
11  
12  
13  
14  
15  
16  
17  
18  
19  
20  
21  
22  
23  
24  
25  
26  
27  
28  
29  
30  
31  
32  
33  
34  
35  
36  
37  
38  
39  
40  
41  
42  
43  
44  
45  
46

For peer review only

Table 3 Multivariate analysis by proportional subdistribution hazard model and cause-specific hazards model for CSD among patients with UTUC.

| Variables      | Proportional subdistribution hazards model |       |             |          | Cause-specific hazards model |       |             |          |
|----------------|--------------------------------------------|-------|-------------|----------|------------------------------|-------|-------------|----------|
|                | Coefficient                                | sdHR  | 95%CI       | <i>P</i> | Coefficient                  | csHR  | 95%CI       | <i>P</i> |
| Age            | -0.004                                     | 0.996 | 0.987-1.005 | 0.340    | 0.009                        | 1.009 | 1.000-1.018 | 0.039    |
| Sex            |                                            |       |             |          |                              |       |             |          |
| Male           | Reference                                  |       |             |          | Reference                    |       |             |          |
| Female         | 0.392                                      | 1.480 | 1.241-1.764 | <0.001   | 0.301                        | 1.351 | 1.134-1.611 | <0.001   |
| Race           |                                            |       |             |          |                              |       |             |          |
| White          | Reference                                  |       |             |          | Reference                    |       |             |          |
| Black          | 0.242                                      | 1.274 | 0.873-1.858 | 0.210    | 0.348                        | 1.416 | 0.990-2.027 | 0.057    |
| Other          | 0.201                                      | 1.223 | 0.930-1.607 | 0.150    | 0.164                        | 1.178 | 0.899-1.544 | 0.235    |
| Site           |                                            |       |             |          |                              |       |             |          |
| Renal pelvis   | Reference                                  |       |             |          | Reference                    |       |             |          |
| Ureter         | -0.110                                     | 0.895 | 0.734-1.092 | 0.280    | -0.106                       | 0.899 | 0.732-1.105 | 0.313    |
| Grade          |                                            |       |             |          |                              |       |             |          |
| Well           | Reference                                  |       |             |          | Reference                    |       |             |          |
| Moderate       | -0.034                                     | 0.966 | 0.398-2.343 | 0.940    | 0.009                        | 1.009 | 0.407-2.502 | 0.985    |
| Poor           | 0.763                                      | 2.145 | 0.971-4.739 | 0.059    | 0.908                        | 2.479 | 1.097-5.601 | 0.029    |
| Undifferential | 0.658                                      | 1.931 | 0.878-4.245 | 0.100    | 0.772                        | 2.165 | 0.961-4.875 | 0.062    |
| Size           |                                            |       |             |          |                              |       |             |          |
| <2             | Reference                                  |       |             |          | Reference                    |       |             |          |
| [2,4)          | 0.442                                      | 1.556 | 1.092-2.216 | 0.014    | 0.414                        | 1.513 | 1.043-2.196 | 0.029    |
| ≥4             | 0.791                                      | 2.205 | 1.575-3.087 | <0.001   | 0.881                        | 2.414 | 1.691-3.447 | <0.001   |
| Surgery        |                                            |       |             |          |                              |       |             |          |
| Yes            | Reference                                  |       |             |          | Reference                    |       |             |          |
| NO/Unknown     | 0.791                                      | 2.205 | 1.292-3.761 | 0.004    | 0.752                        | 2.120 | 0.990-4.539 | 0.053    |
| Radiotherapy   |                                            |       |             |          |                              |       |             |          |

|    |              |           |       |             |        |           |      |            |       |
|----|--------------|-----------|-------|-------------|--------|-----------|------|------------|-------|
| 1  |              |           |       |             |        |           |      |            |       |
| 2  |              |           |       |             |        |           |      |            |       |
| 3  |              |           |       |             |        |           |      |            |       |
| 4  | Yes          | Reference |       |             |        | Reference |      |            |       |
| 5  | NO/Unknown   | -0.219    | 0.803 | 0.594-1.087 | 0.160  | -0.240    | 0.78 | 0.595-1.04 | 0.092 |
| 6  |              |           |       |             |        |           | 7    | 0          |       |
| 7  |              |           |       |             |        |           |      |            |       |
| 8  | Chemotherapy |           |       |             |        |           |      |            |       |
| 9  | Yes          | Reference |       |             |        | Reference |      |            |       |
| 10 | NO/Unknown   | 0.025     | 1.025 | 0.829-1.269 | 0.820  | 0.171     | 1.18 | 0.972-1.45 | 0.093 |
| 11 |              |           |       |             |        |           | 7    | 0          |       |
| 12 |              |           |       |             |        |           |      |            |       |
| 13 | Distant      |           |       |             |        |           |      |            |       |
| 14 | metastasis   |           |       |             |        |           |      |            |       |
| 15 | No           | Reference |       |             |        | Reference |      |            |       |
| 16 | Yes          | 0.881     | 2.414 | 1.842-3.163 | <0.001 | 1.252     | 3.49 | 2.741-4.46 | <0.00 |
| 17 |              |           |       |             |        |           | 7    | 0          | 1     |
| 18 | LNE          | -0.012    | 0.988 | 0.971-1.006 | 0.200  | -0.013    | 0.98 | 0.972-1.00 | 0.091 |
| 19 |              |           |       |             |        |           | 7    | 2          |       |
| 20 | LNP          | 0.062     | 1.064 | 1.022-1.107 | 0.002  | 0.069     | 1.07 | 1.032-1.11 | <0.00 |
| 21 |              |           |       |             |        |           | 2    | 3          | 1     |
| 22 | LNR          | 0.627     | 1.873 | 1.435-2.445 | <0.001 | 0.934     | 2.54 | 1.965-3.29 | <0.00 |
| 23 |              |           |       |             |        |           | 4    | 4          | 1     |
| 24 |              |           |       |             |        |           |      |            |       |
| 25 |              |           |       |             |        |           |      |            |       |
| 26 |              |           |       |             |        |           |      |            |       |
| 27 |              |           |       |             |        |           |      |            |       |

Abbreviations: CSD, cancer-specific death; UTUC, upper-tract urothelial carcinoma; sdHR, subdistribution hazard ratio; csHR, Cause-specific hazard ratio; LNE, lymph nodes examined; LNP, lymph nodes positive; LNR, lymph nodes ratio.

## Figure legends

**Figure 1.** Data selection flowchart.

**Figure 2.** The CIF curves of CSD and DOC among UTUC patients.

Abbreviations: CIF, cumulative incidence function; CSD, cancer-specific death;

DOC: death due to other causes; UTUC, upper-tract urothelial carcinoma.

**Figure 3.** Nomogram based on the competing risk analysis to predict CSD probabilities at 3, 5, and 8 years for UTUC patients.

Abbreviations: CSD, cancer-specific death; UTUC, upper-tract urothelial carcinoma;

LNE: lymph nodes examined; LNP: lymph nodes positive.

**Figure 4.** Calibration curves. Calibration curves for 3, 5, and 8 years of the training (A, B, C) and validation (D, E, F) cohorts.



Figure 1. Data selection flowchart.

210x159mm (120 x 120 DPI)



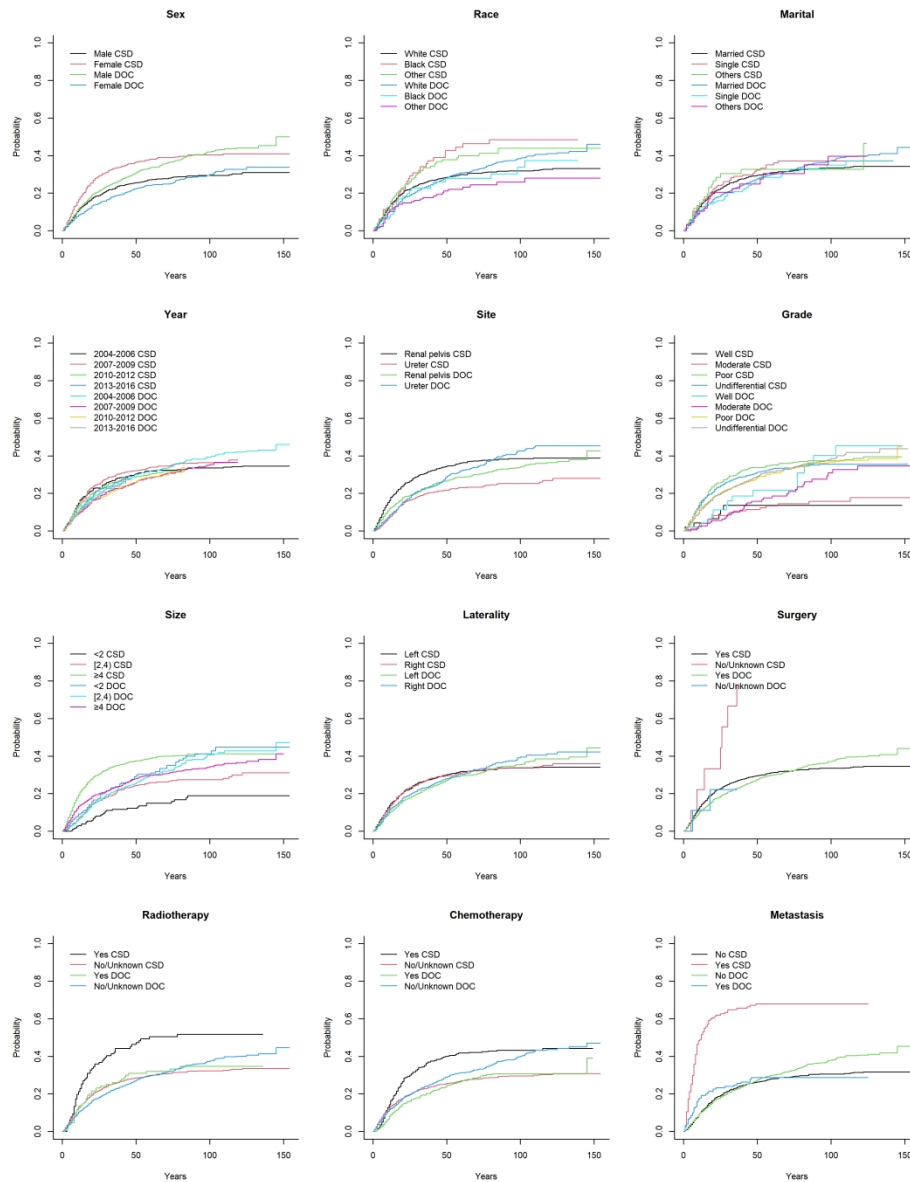

Figure 2. The CIF curves of CSD and DOC among UTUC patients. Abbreviations: CIF, cumulative incidence function; CSD, cancer-specific death; DOC: death due to other causes; UTUC, upper-tract urothelial carcinoma.

296x381mm (300 x 300 DPI)



Figure 3. Nomogram based on the competing risk analysis to predict CSD probabilities at 3, 5, and 8 years for UTUC patients.

Abbreviations: CSD, cancer-specific death; UTUC, upper-tract urothelial carcinoma; LNE: lymph nodes examined; LNP: lymph nodes positive.

254x211mm (300 x 300 DPI)

1  
2  
3  
4  
5  
6  
7  
8  
9  
10  
11  
12  
13  
14  
15  
16  
17  
18  
19  
20  
21  
22  
23  
24  
25  
26  
27  
28  
29  
30  
31  
32  
33  
34  
35  
36  
37  
38  
39  
40  
41  
42  
43  
44  
45  
46  
47  
48  
49  
50  
51  
52  
53  
54  
55  
56  
57  
58  
59  
60



Figure 4. Calibration curves. Calibration curves for 3, 5, and 8 years of the training (A, B, C) and validation (D, E, F) cohorts.

296x211mm (300 x 300 DPI)

## TRIPOD Checklist: Prediction Model Development

| Section                   | Item | Checklist description                                                                                                                                                                            | Reported on Page Number/Line Number | Reported on Section/Paragraph |
|---------------------------|------|--------------------------------------------------------------------------------------------------------------------------------------------------------------------------------------------------|-------------------------------------|-------------------------------|
| <b>Title and abstract</b> |      |                                                                                                                                                                                                  |                                     |                               |
| Title                     | 1    | Identify the study as developing and/or validating a multivariable prediction model, the target population, and the outcome to be predicted.                                                     |                                     |                               |
| Abstract                  | 2    | Provide a summary of objectives, study design, setting, participants, sample size, predictors, outcome, statistical analysis, results, and conclusions.                                          |                                     |                               |
| <b>Introduction</b>       |      |                                                                                                                                                                                                  |                                     |                               |
| Background and objectives | 3a   | Explain the medical context (including whether diagnostic or prognostic) and rationale for developing or validating the multivariable prediction model, including references to existing models. |                                     |                               |
|                           | 3b   | Specify the objectives, including whether the study describes the development or validation of the model or both.                                                                                |                                     |                               |
| <b>Methods</b>            |      |                                                                                                                                                                                                  |                                     |                               |
| Source of data            | 4a   | Describe the study design or source of data (e.g., randomized trial, cohort, or registry data), separately for the development and validation data sets, if applicable.                          |                                     |                               |
|                           | 4b   | Specify the key study dates, including start of accrual; end of accrual; and, if applicable, end of follow-up.                                                                                   |                                     |                               |
| Participants              | 5a   | Specify key elements of the study setting (e.g., primary care, secondary care, general population) including number and location of centres.                                                     |                                     |                               |
|                           | 5b   | Describe eligibility criteria for participants.                                                                                                                                                  |                                     |                               |
|                           | 5c   | Give details of treatments received, if relevant.                                                                                                                                                |                                     |                               |
| Outcome                   | 6a   | Clearly define the outcome that is predicted by the prediction model, including how and when assessed.                                                                                           |                                     |                               |
|                           | 6b   | Report any actions to blind assessment of the outcome to be predicted.                                                                                                                           |                                     |                               |
| Predictors                | 7a   | Clearly define all predictors used in developing or validating the multivariable prediction model, including how and when they were measured.                                                    |                                     |                               |
|                           | 7b   | Report any actions to blind assessment of predictors for the outcome and other predictors.                                                                                                       |                                     |                               |
| Sample size               | 8    | Explain how the study size was arrived at.                                                                                                                                                       |                                     |                               |

|                              |     |                                                                                                                                                                                                       |  |  |
|------------------------------|-----|-------------------------------------------------------------------------------------------------------------------------------------------------------------------------------------------------------|--|--|
| Missing data                 | 9   | Describe how missing data were handled (e.g., complete-case analysis, single imputation, multiple imputation) with details of any imputation method.                                                  |  |  |
| Statistical analysis methods | 10a | Describe how predictors were handled in the analyses.                                                                                                                                                 |  |  |
|                              | 10b | Specify type of model, all model-building procedures (including any predictor selection), and method for internal validation.                                                                         |  |  |
|                              | 10d | Specify all measures used to assess model performance and, if relevant, to compare multiple models.                                                                                                   |  |  |
| Risk groups                  | 11  | Provide details on how risk groups were created, if done.                                                                                                                                             |  |  |
| <b>Results</b>               |     |                                                                                                                                                                                                       |  |  |
| Participants                 | 13a | Describe the flow of participants through the study, including the number of participants with and without the outcome and, if applicable, a summary of the follow-up time. A diagram may be helpful. |  |  |
|                              | 13b | Describe the characteristics of the participants (basic demographics, clinical features, available predictors), including the number of participants with missing data for predictors and outcome.    |  |  |
| Model development            | 14a | Specify the number of participants and outcome events in each analysis.                                                                                                                               |  |  |
|                              | 14b | If done, report the unadjusted association between each candidate predictor and outcome.                                                                                                              |  |  |
| Model specification          | 15a | Present the full prediction model to allow predictions for individuals (i.e., all regression coefficients, and model intercept or baseline survival at a given time point).                           |  |  |
|                              | 15b | Explain how to use the prediction model.                                                                                                                                                              |  |  |
| Model performance            | 16  | Report performance measures (with CIs) for the prediction model.                                                                                                                                      |  |  |
| <b>Discussion</b>            |     |                                                                                                                                                                                                       |  |  |
| Limitations                  | 18  | Discuss any limitations of the study (such as nonrepresentative sample, few events per predictor, missing data).                                                                                      |  |  |
| Interpretation               | 19b | Give an overall interpretation of the results, considering objectives, limitations, and results from similar studies, and other relevant evidence.                                                    |  |  |
| Implications                 | 20  | Discuss the potential clinical use of the model and implications for future research.                                                                                                                 |  |  |
| <b>Other information</b>     |     |                                                                                                                                                                                                       |  |  |
| Supplementary information    | 21  | Provide information about the availability of supplementary resources, such as study protocol, Web calculator, and data sets.                                                                         |  |  |
| Funding                      | 22  | Give the source of funding and the role of the funders for the present study.                                                                                                                         |  |  |

1  
2  
3  
4  
5  
6  
7  
8  
9  
10  
11  
12  
13  
14  
15  
16  
17  
18  
19  
20  
21  
22  
23  
24  
25  
26  
27  
28  
29  
30  
31  
32  
33  
34  
35  
36  
37  
38  
39  
40  
41  
42  
43  
44  
45  
46



For peer review only
